# Supplementary material
Source: Royal Society of Chemistry journal article supplement (doi:10.1039/d6ja00086j)
Supplement: d6ja00086j1.pdf [file d6ja00086j1.pdf]

**Table S1. EPMA data for wolframite.**

| Mount_Sample_Grain-Analysis | WO3(wt.%) | FeO   | MnO    | TiO2 | UO2 | Nb2O5 | SnO2  | Sb2O5 | Total   | N | XFe =<br>Fe/(Fe+Mn)<br>mol% | Comments |
|-----------------------------|-----------|-------|--------|------|-----|-------|-------|-------|---------|---|-----------------------------|----------|
| <b>Session-240815</b>       |           |       |        |      |     |       |       |       |         |   |                             |          |
| A6954_24MHP12B_1-1r         | 75.224    | 4.78  | 19.59  | 0    | 0   | 0.114 | 0     | 0.032 | 99.74   |   | 0.194                       |          |
| A6954_24MHP12B_1-2c         | 74.868    | 4.693 | 19.542 | 0    | 0   | 0.114 | 0.003 | 0     | 99.22   |   | 0.192                       |          |
| A6954_24MHP12B_2            | 75.569    | 3.539 | 20.631 | 0    | 0   | 0.11  | 0     | 0     | 99.849  |   | 0.145                       |          |
| A6954_24MHP12B_4-1r         | 75.357    | 3.355 | 20.859 | 0    | 0   | 0.185 | 0.002 | 0     | 99.758  |   | 0.137                       |          |
| A6954_24MHP12B_4-2c         | 75.434    | 3.61  | 20.578 | 0    | 0   | 0.291 | 0.007 | 0.016 | 99.936  |   | 0.148                       |          |
| A6954_24MHP12B_5c           | 75.044    | 4.314 | 20.032 | 0    | 0   | 0.114 | 0     | 0     | 99.504  |   | 0.175                       |          |
| A6954_24MHP12B_6c           | 74.759    | 4.623 | 19.522 | 0    | 0   | 0.287 | 0.006 | 0.002 | 99.199  |   | 0.190                       |          |
| A6954_24MHP12B_7c           | 74.847    | 4.06  | 20.214 | 0    | 0   | 0.072 | 0.014 | 0     | 99.207  |   | 0.165                       |          |
| A6954_24MHP12B_9            | 75.471    | 4.456 | 20.182 | 0    | 0   | 0.173 | 0.022 | 0     | 100.304 |   | 0.179                       |          |
| A6954_24MHP12B_10           | 75.156    | 3.503 | 20.773 | 0    | 0   | 0.194 | 0.014 | 0     | 99.64   |   | 0.143                       |          |
| A6954_24MHP12B_11           | 74.953    | 3.919 | 20.361 | 0    | 0   | 0.164 | 0     | 0     | 99.397  |   | 0.160                       |          |
| A6954_24MHP12B_19-1r        | 75.183    | 3.575 | 20.723 | 0    | 0   | 0.219 | 0     | 0     | 99.7    |   | 0.146                       |          |
| A6954_24MHP12B_19-2c        | 74.781    | 4.965 | 19.272 | 0    | 0   | 0.152 | 0     | 0     | 99.17   |   | 0.203                       |          |
| A6954_24MHP12B_20           | 74.386    | 4.577 | 19.771 | 0    | 0   | 0.253 | 0     | 0.005 | 98.992  |   | 0.186                       |          |
| A6954_24MHP12B_22-2r        | 75.125    | 4.205 | 20.034 | 0    | 0   | 0.093 | 0     | 0     | 99.457  |   | 0.172                       |          |
| A6954_24MHP12B_23r          | 74.941    | 3.141 | 21.061 | 0    | 0   | 0.127 | 0.035 | 0     | 99.305  |   | 0.128                       |          |
| A6954_24MHP12B_24-1r        | 74.278    | 3.424 | 20.909 | 0    | 0   | 0.139 | 0     | 0.044 | 98.794  |   | 0.139                       |          |
| A6954_24MHP12B_24-2c        | 75.077    | 3.394 | 20.852 | 0    | 0   | 0.206 | 0     | 0     | 99.529  |   | 0.138                       |          |
| A6954_24MHP12B_25r          | 74.966    | 3.849 | 20.427 | 0    | 0   | 0.109 | 0     | 0.007 | 99.358  |   | 0.157                       |          |
| A6954_24MHP12B_27-1r        | 74.616    | 4.551 | 19.933 | 0    | 0   | 0.034 | 0     | 0     | 99.134  |   | 0.184                       |          |
| A6954_24MHP12B_27-2c        | 74.351    | 3.071 | 21.276 | 0    | 0   | 0.281 | 0     | 0.014 | 98.993  |   | 0.125                       |          |
| BF163_24MHP12B_W1           | 75.067    | 4.675 | 19.593 | 0    | 0   | 0.096 | 0     | 0     | 99.431  |   | 0.191                       |          |
| BF163_24MHP12B_W2           | 75.305    | 3.647 | 20.659 | 0    | 0   | 0.071 | 0     | 0     | 99.682  |   | 0.148                       |          |
| BF163_24MHP12B_W3           | 75.303    | 3.895 | 20.662 | 0    | 0   | 0.138 | 0     | 0     | 99.998  |   | 0.157                       |          |
| BF163_24MHP12B_W4           | 75.183    | 3.802 | 20.34  | 0    | 0   | 0.142 | 0.001 | 0     | 99.468  |   | 0.156                       |          |
| BF164_24MHP12B_WO11         | 75.58     | 3.443 | 20.807 | 0    | 0   | 0.297 | 0     | 0     | 100.127 |   | 0.140                       |          |
| BF164_24MHP12B_WO12         | 75.167    | 5.094 | 19.245 | 0    | 0   | 0.075 | 0.036 | 0     | 99.617  |   | 0.207                       |          |

|                                    |                  |                   |                   |              |              |                  |              |              |                   |                         |
|------------------------------------|------------------|-------------------|-------------------|--------------|--------------|------------------|--------------|--------------|-------------------|-------------------------|
| BF164_24MHP12B_WOI3                | 75.963           | 5.024             | 19.254            | 0            | 0            | 0.172            | 0.02         | 0.004        | 100.437           | 0.205                   |
| BF164_24MHP12B_WOI4                | 75.488           | 3.613             | 20.932            | 0            | 0            | 0.163            | 0            | 0            | 100.196           | 0.146                   |
| S3382_24MHP12B_w1                  | 75.075           | 4.731             | 19.442            | 0            | 0            | 0.142            | 0            | 0            | 99.39             | 0.194                   |
| S3382_24MHP12B_w2                  | 75.211           | 5.158             | 19.208            | 0            | 0            | 0.162            | 0            | 0            | 99.739            | 0.210                   |
| S3382_24MHP12B_w3                  | 75.291           | 3.835             | 20.471            | 0            | 0            | 0.154            | 0            | 0            | 99.751            | 0.156                   |
| S3382_24MHP12B_w4                  | 75.426           | 3.214             | 20.918            | 0            | 0            | 0.194            | 0.025        | 0.002        | 99.779            | 0.132                   |
| S3382_24MHP12B_w5                  | 75.442           | 5.435             | 19.004            | 0            | 0            | 0.149            | 0            | 0            | 100.03            | 0.220                   |
| S3382_24MHP12B_w6                  | 75.701           | 5.448             | 18.806            | 0            | 0            | 0.121            | 0            | 0            | 100.076           | 0.222                   |
| S3382_24MHP12B_w7                  | 75.259           | 4.588             | 19.798            | 0            | 0            | 0.149            | 0.005        | 0.019        | 99.818            | 0.186                   |
| S3382_24MHP12B_w8                  | 75.248           | 5.05              | 19.419            | 0            | 0            | 0.206            | 0            | 0            | 99.923            | 0.204                   |
| S3382_24MHP12B_w9                  | 76.067           | 2.986             | 21.431            | 0            | 0            | 0.089            | 0            | 0            | 100.573           | 0.121                   |
| S3382_24MHP12B_w10                 | 75.719           | 4.766             | 19.846            | 0            | 0            | 0.177            | 0            | 0            | 100.508           | 0.192                   |
| S3382_24MHP12B_w11                 | 75.535           | 3.715             | 20.482            | 0            | 0            | 0.258            | 0            | 0            | 99.99             | 0.152                   |
| S3382_24MHP12B_w12                 | 75.14            | 3.668             | 20.652            | 0            | 0            | 0.245            | 0            | 0            | 99.705            | 0.149                   |
| <del>S3382_24MHP12B_w13</del>      | <del>75.37</del> | <del>11.816</del> | <del>12.629</del> | <del>0</del> | <del>0</del> | <del>0.133</del> | <del>0</del> | <del>0</del> | <del>99.948</del> | 0.480 outlier; rejected |
| S3382_24MHP12B_w14                 | 75.169           | 3.737             | 20.56             | 0            | 0            | 0.06             | 0.018        | 0            | 99.544            | 0.152                   |
| S3382_24MHP12B_w15                 | 75.805           | 4.373             | 19.815            | 0            | 0            | 0.197            | 0            | 0.011        | 100.201           | 0.179                   |
| S3382_24MHP12B_w16                 | 75.807           | 5.292             | 19.019            | 0            | 0            | 0.157            | 0            | 0.004        | 100.279           | 0.216                   |
| S3382_24MHP12B_w17                 | 73.923           | 4.369             | 20.117            | 0            | 0            | 0.184            | 0            | 0            | 98.593            | 0.177                   |
| S3382_24MHP12B_w18                 | 75.245           | 3.734             | 20.638            | 0            | 0            | 0.124            | 0            | 0.014        | 99.755            | 0.152                   |
| S3382_24MHP12B_w19                 | 75.663           | 3.807             | 20.222            | 0            | 0            | 0.04             | 0.019        | 0            | 99.751            | 0.157                   |
| S3382_24MHP12B_w21                 | 75.094           | 7.207             | 16.787            | 0            | 0            | 0.105            | 0            | 0            | 99.193            | 0.298                   |
| S3382_24MHP12B_w22                 | 75.934           | 4.582             | 19.854            | 0            | 0            | 0.137            | 0            | 0            | 100.507           | 0.186                   |
| 24MHP12B (average, n=49 out of 50) | 75.21            | 4.21              | 20.09             |              |              | 0.16             |              |              |                   | 0.17                    |
| %RSD                               | 0.58             | 18.98             | 4.03              |              |              | 41.65            |              |              |                   | 19.11                   |
| A6954_23DHT-24J_w1-1r              | 75.084           | 20.614            | 3.621             | 0            | 0            | 0.038            | 0.004        | 0            | 99.361            | 0.849                   |
| A6954_23DHT-24J_1-2c               | 74.946           | 21.255            | 2.616             | 0            | 0.114        | 0                | 0.004        | 0            | 98.935            | 0.889                   |
| A6954_23DHT-24J_3r                 | 74.575           | 21.576            | 2.456             | 0            | 0            | 0.013            | 0.011        | 0            | 98.631            | 0.897                   |
| A6954_23DHT-24J_4r                 | 75.19            | 21.562            | 2.487             | 0.014        | 0.027        | 0                | 0            | 0.002        | 99.282            | 0.895                   |
| A6954_23DHT-24J_7-1r               | 75.04            | 21.509            | 2.459             | 0            | 0            | 0.042            | 0.02         | 0            | 99.07             | 0.896                   |
| A6954_23DHT-24J_7-2c               | 74.911           | 21.374            | 2.47              | 0            | 0.038        | 0                | 0            | 0            | 98.793            | 0.895                   |
| A6954_23DHT-24J_8-1r               | 75.184           | 21.589            | 2.632             | 0            | 0            | 0                | 0            | 0.004        | 99.409            | 0.890                   |
| A6954_23DHT-24J_8-2c               | 75.028           | 21.439            | 2.643             | 0            | 0            | 0.059            | 0.021        | 0.014        | 99.204            | 0.889                   |

Table S1

|                          |        |        |        |       |       |        |       |       |        |       |
|--------------------------|--------|--------|--------|-------|-------|--------|-------|-------|--------|-------|
| A6954_23DHT-24J_9-1r     | 75.629 | 21.46  | 2.63   | 0.023 | 0     | 0      | 0     | 0.019 | 99.761 | 0.890 |
| A6954_23DHT-24J_12-1r    | 74.971 | 21.615 | 2.304  | 0     | 0     | 0      | 0.012 | 0.01  | 98.912 | 0.903 |
| A6954_23DHT-24J_12-2c    | 75.663 | 21.48  | 2.645  | 0     | 0.014 | 0.129  | 0     | 0.004 | 99.935 | 0.889 |
| A6954_23DHT-24J_15-1r    | 75.379 | 21.622 | 2.382  | 0     | 0     | 0.083  | 0     | 0     | 99.466 | 0.900 |
| A6954_23DHT-24J_16-1r    | 75.287 | 19.737 | 4.418  | 0     | 0     | 0.054  | 0.021 | 0     | 99.517 | 0.815 |
| A6954_23DHT-24J_21       | 75.184 | 21.338 | 2.354  | 0.011 | 0.056 | 0.104  | 0.016 | 0.021 | 99.084 | 0.899 |
| A6954_23DHT-24J_24-1r    | 74.493 | 21.494 | 2.518  | 0     | 0     | 0.075  | 0     | 0     | 98.58  | 0.894 |
| A6954_23DHT-24J_25-1r    | 75.647 | 21.234 | 2.792  | 0     | 0     | 0.054  | 0.004 | 0.037 | 99.768 | 0.882 |
| A6954_23DHT-24J_26-1r    | 75.127 | 22.477 | 1.741  | 0.019 | 0.034 | 0      | 0     | 0     | 99.398 | 0.927 |
| A6954_23DHT-24J_26-2c    | 75.048 | 22.709 | 1.193  | 0.206 | 0     | 0.066  | 0.023 | 0     | 99.245 | 0.949 |
| A6954_23DHT-24J_28-1r    | 75.336 | 21.257 | 2.587  | 0     | 0     | 0.133  | 0.007 | 0     | 99.32  | 0.890 |
| A6954_23DHT-24J_30-1c    | 75.363 | 21.128 | 2.61   | 0     | 0     | 0      | 0.006 | 0.065 | 99.172 | 0.889 |
| BF163_23DHT24J_W1        | 74.957 | 21.898 | 2.2    | 0     | 0     | 0.034  | 0     | 0     | 99.089 | 0.908 |
| BF163_23DHT24J_W2        | 74.887 | 21.378 | 2.603  | 0     | 0     | 0      | 0     | 0.007 | 98.875 | 0.890 |
| BF163_23DHT24J_W3        | 74.607 | 21.367 | 2.506  | 0     | 0.044 | 0      | 0.01  | 0     | 98.534 | 0.894 |
| BF163_23DHT24J_W4        | 75.025 | 21.676 | 2.453  | 0     | 0.046 | 0      | 0     | 0     | 99.2   | 0.897 |
| 23DHT24J (average, n=24) | 75.11  | 21.45  | 2.56   |       |       | 0.04   |       |       |        | 0.89  |
| %RSD                     | 0.41   | 2.55   | 22.38  |       |       | 117.80 |       |       |        | 2.66  |
| BF163_24MHP43_w1         | 75.344 | 14.21  | 9.804  | 0     | 0     | 0.068  | 0     | 0.02  | 99.446 | 0.589 |
| BF163_24MHP43_w2         | 75.105 | 16.082 | 7.686  | 0     | 0     | 0      | 0     | 0     | 98.873 | 0.674 |
| BF163_24MHP43_w3         | 75.279 | 13.187 | 10.252 | 0     | 0     | 0.013  | 0     | 0     | 98.731 | 0.559 |
| BF163_24MHP43_w4         | 74.926 | 15.274 | 8.805  | 0     | 0     | 0.059  | 0.003 | 0     | 99.067 | 0.631 |
| BF163_24MHP43_w5         | 75.892 | 13.299 | 10.497 | 0     | 0     | 0.047  | 0.007 | 0     | 99.742 | 0.556 |
| BF163_24MHP43_w6         | 75.006 | 14.619 | 9.415  | 0     | 0     | 0.076  | 0.02  | 0.012 | 99.148 | 0.605 |
| BF163_24MHP43_w7         | 75.584 | 16.651 | 7.162  | 0     | 0     | 0      | 0     | 0     | 99.397 | 0.697 |
| BF163_24MHP43_w9         | 75.412 | 15.437 | 8.552  | 0     | 0     | 0.119  | 0.012 | 0     | 99.532 | 0.641 |
| BF163_24MHP43_w10        | 75.116 | 14.904 | 8.912  | 0     | 0.014 | 0      | 0.005 | 0     | 98.951 | 0.623 |
| BF163_24MHP43_w11        | 75.196 | 12.929 | 10.682 | 0     | 0     | 0.051  | 0.018 | 0     | 98.876 | 0.544 |
| BF163_24MHP43_w12        | 75.351 | 14.932 | 8.815  | 0     | 0     | 0      | 0     | 0     | 99.098 | 0.626 |
| BF163_24MHP43_w13        | 76.167 | 13.024 | 10.529 | 0     | 0     | 0.03   | 0     | 0     | 99.75  | 0.550 |
| BF163_24MHP43_w14        | 74.932 | 14.042 | 9.983  | 0     | 0     | 0.047  | 0     | 0     | 99.004 | 0.581 |
| BF163_24MHP43_w22        | 75.715 | 13.719 | 9.786  | 0     | 0     | 0.199  | 0     | 0.019 | 99.438 | 0.581 |
| BF163_24MHP43_w23        | 75.258 | 16.153 | 7.979  | 0     | 0     | 0.106  | 0     | 0.015 | 99.511 | 0.667 |
| BF163_24MHP43_w24        | 75.427 | 15.122 | 8.529  | 0     | 0.008 | 0.178  | 0.02  | 0     | 99.284 | 0.636 |

|                         |        |        |        |       |       |        |       |       |         |       |
|-------------------------|--------|--------|--------|-------|-------|--------|-------|-------|---------|-------|
| BF163_24MHP43_w26       | 74.953 | 15.406 | 8.596  | 0     | 0.031 | 0.059  | 0.023 | 0     | 99.068  | 0.639 |
| BF163_24MHP43_w27-1     | 75.39  | 13.963 | 9.833  | 0     | 0     | 0.072  | 0     | 0     | 99.258  | 0.584 |
| BF163_24MHP43_w27-2     | 74.632 | 12.785 | 10.841 | 0     | 0     | 0.034  | 0     | 0.006 | 98.298  | 0.538 |
| BF163_24MHP43_w29-1     | 74.548 | 16.87  | 6.717  | 0     | 0     | 0.072  | 0.01  | 0.013 | 98.23   | 0.713 |
| BF163_24MHP43_w29-2     | 75.667 | 15.658 | 8.565  | 0     | 0     | 0.004  | 0.003 | 0.051 | 99.948  | 0.644 |
| BF163_24MHP43_w30       | 75.328 | 12.813 | 10.944 | 0     | 0     | 0      | 0.009 | 0     | 99.094  | 0.536 |
| BF163_24MHP43_w31       | 75.599 | 14.843 | 8.846  | 0     | 0     | 0.055  | 0     | 0     | 99.343  | 0.624 |
| BF164_24MHP43_WOI1      | 76.602 | 15.982 | 7.98   | 0     | 0     | 0.093  | 0     | 0     | 100.657 | 0.664 |
| BF164_24MHP43_WOI2      | 75.693 | 12.79  | 10.902 | 0     | 0     | 0.089  | 0.016 | 0     | 99.49   | 0.537 |
| BF164_24MHP43_WOI3      | 74.784 | 13.579 | 10.008 | 0     | 0     | 0.038  | 0.013 | 0     | 98.422  | 0.573 |
| BF164_24MHP43_WOI4      | 75.098 | 16.004 | 7.681  | 0     | 0     | 0.025  | 0.054 | 0     | 98.862  | 0.673 |
| BF164_24MHP43_WOI5      | 74.944 | 17.35  | 6.707  | 0     | 0     | 0.017  | 0     | 0.008 | 99.026  | 0.719 |
| BF164_24MHP43_WOI7      | 75.292 | 14.389 | 9.076  | 0.011 | 0     | 0      | 0.003 | 0     | 98.771  | 0.610 |
| BF164_24MHP43_WOI8      | 75.541 | 12.369 | 11.493 | 0     | 0     | 0.063  | 0.028 | 0     | 99.494  | 0.515 |
| BF164_24MHP43_WOI9      | 74.663 | 14.841 | 8.606  | 0     | 0     | 0.034  | 0     | 0     | 98.144  | 0.630 |
| BF164_24MHP43_WOI10     | 75.233 | 11.456 | 12.196 | 0     | 0     | 0.11   | 0     | 0     | 98.995  | 0.481 |
| BF164_24MHP43_WOI12     | 74.426 | 13.732 | 9.838  | 0     | 0     | 0.013  | 0.022 | 0     | 98.031  | 0.580 |
| BF164_24MHP43_WOI13     | 75.44  | 14.447 | 9.679  | 0     | 0     | 0      | 0.018 | 0     | 99.584  | 0.596 |
| BF164_24MHP43_WOI14     | 75.342 | 13.652 | 10.136 | 0     | 0     | 0.051  | 0.019 | 0     | 99.2    | 0.571 |
| BF164_24MHP43_WOI16     | 75.37  | 14.172 | 9.884  | 0     | 0     | 0.03   | 0     | 0     | 99.456  | 0.586 |
| BF164_24MHP43_WOI25     | 75.359 | 15.508 | 8.578  | 0     | 0     | 0      | 0.014 | 0     | 99.459  | 0.641 |
| BF164_24MHP43_WOI26     | 75.863 | 14.573 | 9.014  | 0     | 0     | 0.008  | 0.013 | 0.002 | 99.473  | 0.615 |
| BF164_24MHP43_WOI30     | 74.887 | 15.962 | 8.143  | 0     | 0     | 0      | 0.012 | 0     | 99.004  | 0.659 |
| BF164_24MHP43_WOI31     | 74.728 | 14.097 | 9.706  | 0     | 0     | 0.11   | 0     | 0     | 98.641  | 0.589 |
| BF164_24MHP43_WOI32     | 75.094 | 14.923 | 9.182  | 0     | 0     | 0      | 0     | 0     | 99.199  | 0.616 |
| BF164_24MHP43_WOI33     | 74.207 | 15.341 | 8.571  | 0     | 0.011 | 0      | 0     | 0     | 98.13   | 0.639 |
| BF164_24MHP43_WOI36bb   | 75.64  | 13.141 | 10.839 | 0     | 0     | 0.084  | 0     | 0     | 99.704  | 0.545 |
| 24MHP43 (average, n=43) | 75.26  | 14.52  | 9.30   |       |       | 0.05   |       |       |         | 0.61  |
| %RSD                    | 0.61   | 9.05   | 13.38  |       |       | 100.93 |       |       |         | 8.81  |

**Session-241021**

Comment WO3 FeO MnO TiO2 UO2 Nb2O5 SnO2 Sb2O5 Total

|                                |                   |                  |                   |              |              |                  |                  |                  |                   |                         |
|--------------------------------|-------------------|------------------|-------------------|--------------|--------------|------------------|------------------|------------------|-------------------|-------------------------|
| BF183_24MHP12B_wrm1-1          | 74.663            | 5.058            | 19.269            | 0            | 0            | 0.14             | 0                | 0                | 99.13             | 0.206                   |
| BF183_24MHP12B_wrm1-2          | 75.35             | 5.262            | 19.256            | 0            | 0            | 0.189            | 0                | 0.02             | 100.077           | 0.212                   |
| BF183_24MHP12B_wrm2            | 75.64             | 4.813            | 19.585            | 0            | 0            | 0.201            | 0.011            | 0.034            | 100.284           | 0.195                   |
| BF183_24MHP12B_wrm3            | 75.036            | 4.494            | 19.933            | 0            | 0            | 0.238            | 0.001            | 0                | 99.702            | 0.182                   |
| BF183_24MHP12B_wrm4            | 74.932            | 4.053            | 20.429            | 0            | 0            | 0.176            | 0.018            | 0.037            | 99.645            | 0.164                   |
| BF183_24MHP12B_wrm5            | 75.294            | 4.608            | 19.702            | 0            | 0            | 0.244            | 0                | 0                | 99.848            | 0.188                   |
| BF183_24MHP12B_wrm6            | 75.16             | 3.693            | 20.692            | 0            | 0            | 0.122            | 0                | 0                | 99.667            | 0.150                   |
| BF183_24MHP12B_wrm7            | 75.521            | 4.44             | 19.827            | 0            | 0            | 0.236            | 0                | 0                | 100.024           | 0.181                   |
| BF183_24MHP12B_wrm8            | 75.351            | 3.459            | 20.63             | 0            | 0            | 0.135            | 0.005            | 0.003            | 99.583            | 0.142                   |
| BF183_24MHP12B_wrm9            | 75.129            | 4.596            | 19.978            | 0            | 0            | 0.08             | 0                | 0.014            | 99.797            | 0.185                   |
| BF184_24MHP12B_wrm1-1          | 74.665            | 4.268            | 19.901            | 0            | 0            | 0.142            | 0                | 0                | 98.976            | 0.175                   |
| BF184_24MHP12B_wrm2            | 75.486            | 4.927            | 19.32             | 0            | 0            | 0.105            | 0                | 0.011            | 99.849            | 0.201                   |
| BF184_24MHP12B_wrm6            | 75.647            | 3.408            | 20.954            | 0            | 0            | 0.147            | 0.005            | 0.001            | 100.162           | 0.138                   |
| BF184_24MHP12B_wrm7            | 75.846            | 4.309            | 20.245            | 0            | 0            | 0.138            | 0.005            | 0                | 100.543           | 0.174                   |
| BF184_24MHP12B_wrm8            | 75.105            | 3.86             | 20.539            | 0            | 0            | 0.197            | 0                | 0                | 99.701            | 0.157                   |
| BF184_24MHP12B_wrm10           | 75.465            | 5.109            | 18.66             | 0            | 0            | 0.046            | 0.041            | 0                | 99.321            | 0.213                   |
| BF184_24MHP12B_wrm12           | 74.589            | 3.406            | 20.904            | 0            | 0            | 0.325            | 0                | 0.023            | 99.247            | 0.139                   |
| BF184_24MHP12B_wrm15           | 75.173            | 3.061            | 21.025            | 0            | 0            | 0.029            | 0.022            | 0.008            | 99.318            | 0.126                   |
| BF184_24MHP12B_wrm16           | 75.549            | 3.565            | 20.654            | 0            | 0            | 0.166            | 0                | 0                | 99.934            | 0.146                   |
| BF184_24MHP12B_wrm20           | 75.542            | 4.699            | 19.498            | 0            | 0            | 0.141            | 0                | 0                | 99.88             | 0.192                   |
| BF184_24MHP12B_wrm23           | 75.62             | 4.357            | 19.88             | 0            | 0            | 0.166            | 0                | 0.028            | 100.051           | 0.178                   |
| BF184_24MHP12B_wrm26           | 75.55             | 4.813            | 19.524            | 0            | 0            | 0                | 0                | 0                | 99.887            | 0.196                   |
| BF184_24MHP12B_wrm35           | 75.501            | 4.356            | 19.829            | 0            | 0            | 0.177            | 0                | 0.039            | 99.902            | 0.178                   |
| BF184_24MHP12B_wrm38           | 75.799            | 4.637            | 19.764            | 0            | 0            | 0.181            | 0                | 0.04             | 100.421           | 0.188                   |
| BF184_24MHP12B_wrm39           | 75.37             | 4.583            | 19.873            | 0            | 0            | 0.201            | 0                | 0                | 100.027           | 0.185                   |
| BF184_24MHP12B_wrm42           | 75.274            | 4.611            | 19.842            | 0            | 0            | 0.094            | 0                | 0                | 99.821            | 0.187                   |
| BF184_24MHP12B_wrm45           | 75.146            | 4.194            | 20.106            | 0            | 0            | 0.196            | 0                | 0                | 99.642            | 0.171                   |
| <del>BF186_24MHP12B_wrm1</del> | <del>75.262</del> | <del>4.966</del> | <del>12.247</del> | <del>0</del> | <del>0</del> | <del>0.143</del> | <del>0.001</del> | <del>0.013</del> | <del>99.632</del> | 0.491 outlier; rejected |
| BF186_24MHP12B_wrm2            | 75.44             | 4.503            | 19.853            | 0            | 0            | 0.097            | 0                | 0                | 99.893            | 0.183                   |
| BF186_24MHP12B_wrm3            | 74.474            | 4.575            | 19.602            | 0            | 0            | 0.197            | 0                | 0                | 98.848            | 0.187                   |
| BF186_24MHP12B_wrm4            | 75.085            | 3.746            | 20.705            | 0            | 0            | 0.12             | 0                | 0.009            | 99.665            | 0.152                   |
| BF186_24MHP12B_wrm5            | 75.794            | 3.825            | 20.417            | 0            | 0            | 0.301            | 0.04             | 0                | 100.377           | 0.156                   |
| BF186_24MHP12B_wrm6            | 75.233            | 3.718            | 20.77             | 0            | 0            | 0.136            | 0                | 0                | 99.857            | 0.150                   |

|                                    |                   |                   |                   |              |              |                  |                  |                  |                    |       |                   |
|------------------------------------|-------------------|-------------------|-------------------|--------------|--------------|------------------|------------------|------------------|--------------------|-------|-------------------|
| BF188_24MHP12B_1SW_wrm1            | 75.18             | 4.708             | 19.787            | 0            | 0            | 0.21             | 0                | 0                | 99.885             | 0.190 |                   |
| BF188_24MHP12B_1_wrm2              | 75.061            | 4.299             | 19.889            | 0            | 0            | 0.202            | 0                | 0.023            | 99.474             | 0.176 |                   |
| BF188_24MHP12B_1_wrm3              | 75.561            | 3.464             | 20.828            | 0            | 0            | 0.139            | 0                | 0                | 99.992             | 0.141 |                   |
| BF188_24MHP12B_1_wrm4              | 76.037            | 4.651             | 19.614            | 0            | 0            | 0.088            | 0                | 0                | 100.39             | 0.190 |                   |
| BF188_24MHP12B_1_wrm5              | 75.214            | 4.299             | 20.017            | 0            | 0            | 0.118            | 0                | 0.026            | 99.674             | 0.175 |                   |
| BF188_24MHP12B_1_wrm6              | 75.624            | 4.396             | 20.016            | 0            | 0            | 0.214            | 0.022            | 0.019            | 100.291            | 0.178 |                   |
| BF188_24MHP12B_1_wrm7              | 75.658            | 3.397             | 20.823            | 0.001        | 0            | 0.168            | 0                | 0.006            | 100.053            | 0.139 |                   |
| BF188_24MHP12B_2C_wrm1             | 75.343            | 4.828             | 19.659            | 0            | 0            | 0.101            | 0                | 0.021            | 99.952             | 0.195 |                   |
| BF188_24MHP12B_2C_wrm2             | 75.119            | 4.455             | 19.817            | 0            | 0            | 0.256            | 0                | 0                | 99.647             | 0.182 |                   |
| <del>BF188_24MHP12B_2C_wrm3</del>  | <del>74.422</del> | <del>11.348</del> | <del>12.982</del> | <del>0</del> | <del>0</del> | <del>0.198</del> | <del>0.008</del> | <del>0</del>     | <del>98.958</del>  | 0.463 | outlier; rejected |
| BF188_24MHP12B_2C_wrm4             | 75.071            | 3.699             | 20.582            | 0            | 0            | 0.172            | 0.026            | 0                | 99.55              | 0.151 |                   |
| BF188_24MHP12B_2C_wrm5             | 75.505            | 3.905             | 20.635            | 0            | 0            | 0.151            | 0                | 0                | 100.196            | 0.157 |                   |
| BF188_24MHP12B_2C_wrm6             | 75.672            | 5.292             | 19.116            | 0            | 0            | 0.235            | 0                | 0                | 100.315            | 0.215 |                   |
| BF188_24MHP12B_2C_wrm7             | 75.807            | 3.811             | 20.699            | 0            | 0            | 0.109            | 0                | 0                | 100.426            | 0.154 |                   |
| BF188_24MHP12B_2C_wrm8             | 75.599            | 4.359             | 19.922            | 0            | 0            | 0.235            | 0.036            | 0                | 100.151            | 0.178 |                   |
| BF188_24MHP12B_2C_wrm9             | 75.601            | 3.59              | 20.601            | 0            | 0            | 0.202            | 0.005            | 0.006            | 100.005            | 0.147 |                   |
| BF189_24MHP12B_1c_wrm1             | 75.885            | 3.696             | 20.675            | 0            | 0            | 0.198            | 0                | 0                | 100.454            | 0.150 |                   |
| BF189_24MHP12B_1c_wrm2             | 75.584            | 3.304             | 20.94             | 0            | 0            | 0.172            | 0                | 0.009            | 100.009            | 0.135 |                   |
| BF189_24MHP12B_1c_wrm3             | 75.902            | 3.297             | 21.061            | 0            | 0            | 0.151            | 0                | 0                | 100.411            | 0.134 |                   |
| BF189_24MHP12B_1c_wrm4             | 75.574            | 3.631             | 20.665            | 0            | 0            | 0.109            | 0                | 0.025            | 100.004            | 0.148 |                   |
| BF189_24MHP12B_1c_wrm5             | 75.769            | 4.344             | 20.086            | 0            | 0            | 0.097            | 0                | 0.001            | 100.297            | 0.176 |                   |
| BF189_24MHP12B_1c_wrm6             | 76.024            | 2.514             | 21.897            | 0            | 0            | 0                | 0                | 0                | 100.435            | 0.102 |                   |
| BF189_24MHP12B_1c_wrm7             | 74.67             | 4.365             | 19.968            | 0            | 0            | 0.176            | 0                | 0                | 99.179             | 0.178 |                   |
| BF189_24MHP12B_1c_wrm8             | 75.737            | 4.803             | 19.547            | 0            | 0            | 0.264            | 0.007            | 0                | 100.358            | 0.195 |                   |
| BF189_24MHP12B_1c_wrm9             | 74.849            | 4.26              | 20.131            | 0            | 0            | 0.155            | 0                | 0                | 99.395             | 0.173 |                   |
| BF189_24MHP12B_2se_wrm1            | 75.558            | 3.658             | 20.716            | 0            | 0            | 0.218            | 0                | 0.014            | 100.164            | 0.148 |                   |
| BF189_24MHP12B_2se_wrm2            | 75.205            | 3.664             | 20.764            | 0            | 0            | 0.034            | 0                | 0.012            | 99.679             | 0.148 |                   |
| BF189_24MHP12B_2se_wrm3            | 75.298            | 2.804             | 21.306            | 0            | 0            | 0.155            | 0                | 0                | 99.563             | 0.115 |                   |
| BF189_24MHP12B_2se_wrm4            | 75.107            | 4.983             | 19.442            | 0            | 0            | 0.197            | 0                | 0                | 99.729             | 0.202 |                   |
| <del>BF189_24MHP12B_2se_wrm5</del> | <del>76.242</del> | <del>7.518</del>  | <del>16.923</del> | <del>0</del> | <del>0</del> | <del>0.198</del> | <del>0.005</del> | <del>0</del>     | <del>100.886</del> | 0.305 | outlier; rejected |
| BF189_24MHP12B_2se_wrm6            | 75.762            | 4.32              | 19.72             | 0            | 0            | 0.172            | 0.005            | 0                | 99.979             | 0.178 |                   |
| BF189_24MHP12B_2se_wrm7            | 75.681            | 5.831             | 18.519            | 0            | 0            | 0.029            | 0                | 0.013            | 100.073            | 0.237 |                   |
| BF189_24MHP12B_2se_wrm8            | 74.911            | 3.743             | 20.953            | 0            | 0            | 0.105            | 0                | 0.042            | 99.754             | 0.150 |                   |
| BF189_24MHP12B_2se_wrm9            | 74.698            | 5                 | 19.166            | 0            | 0            | 0.134            | 0                | 0.027            | 99.025             | 0.205 |                   |
| <del>BF191_24MHP12B_wrm1</del>     | <del>75.868</del> | <del>12.118</del> | <del>12.057</del> | <del>0</del> | <del>0</del> | <del>0.144</del> | <del>0</del>     | <del>0.014</del> | <del>100.201</del> | 0.498 | outlier; rejected |

|                                    |                   |                  |                   |              |              |                  |              |              |                   |                         |
|------------------------------------|-------------------|------------------|-------------------|--------------|--------------|------------------|--------------|--------------|-------------------|-------------------------|
| BF191_24MHP12B_wrm3                | 75.42             | 3.64             | 20.632            | 0            | 0            | 0.156            | 0            | 0.057        | 99.905            | 0.148                   |
| BF191_24MHP12B_wrm9                | 76.159            | 4.421            | 19.989            | 0            | 0            | 0.244            | 0.019        | 0.013        | 100.845           | 0.179                   |
| BF191_24MHP12B_wrm10               | 75.393            | 4.546            | 19.573            | 0            | 0            | 0.084            | 0.001        | 0            | 99.597            | 0.187                   |
| BF191_24MHP12B_wrm12               | 75.688            | 3.959            | 20.408            | 0            | 0            | 0.105            | 0.036        | 0            | 100.196           | 0.161                   |
| <del>BF191_24MHP12B_wrm13</del>    | <del>75.398</del> | <del>8.836</del> | <del>15.272</del> | <del>0</del> | <del>0</del> | <del>0.143</del> | <del>0</del> | <del>0</del> | <del>99.649</del> | 0.364 outlier; rejected |
| BF197_24MHP12B_wrm1                | 75.362            | 4.813            | 19.673            | 0            | 0            | 0.088            | 0            | 0            | 99.936            | 0.195                   |
| BF197_24MHP12B_wrm2                | 76.29             | 4.445            | 20.027            | 0            | 0            | 0.156            | 0            | 0            | 100.918           | 0.180                   |
| BF197_24MHP12B_wrm3                | 77.136            | 3.563            | 21.301            | 0            | 0            | 0.311            | 0.003        | 0            | 102.314           | 0.142                   |
| BF197_24MHP12B_wrm4                | 76.676            | 3.611            | 21.176            | 0            | 0            | 0.118            | 0            | 0.008        | 101.589           | 0.144                   |
| BF197_24MHP12B_wrm5                | 75.929            | 3.546            | 20.739            | 0            | 0            | 0.071            | 0            | 0.004        | 100.289           | 0.144                   |
| BF197_24MHP12B_wrm6                | 75.221            | 4.406            | 19.794            | 0            | 0            | 0.234            | 0            | 0.025        | 99.68             | 0.180                   |
| BF197_24MHP12B_wrm7                | 75.094            | 2.821            | 21.775            | 0.006        | 0            | 0.142            | 0.009        | 0            | 99.847            | 0.113                   |
| BF197_24MHP12B_wrm8                | 74.543            | 4.217            | 19.848            | 0            | 0            | 0.125            | 0            | 0            | 98.733            | 0.173                   |
| BF197_24MHP12B_wrm9                | 76.069            | 3.281            | 21.135            | 0            | 0            | 0.171            | 0.021        | 0            | 100.677           | 0.133                   |
| 24MHP12B (average, n=77 out of 82) | 75.44             | 4.15             | 20.19             |              |              | 0.16             |              |              |                   | 0.17                    |
| %RSD                               | 0.61              | 15.41            | 3.33              |              |              | 43.06            |              |              |                   | 15.51                   |
| BF183_23DHT24J_wrm1                | 74.189            | 21.573           | 2.572             | 0.032        | 0.086        | 0.004            | 0            | 0.008        | 98.464            | 0.892                   |
| BF183_23DHT24J_wrm2                | 76.127            | 20.806           | 3.154             | 0            | 0            | 0.004            | 0            | 0            | 100.091           | 0.867                   |
| BF183_23DHT24J_wrm3                | 74.945            | 21.228           | 2.952             | 0            | 0            | 0.128            | 0            | 0            | 99.253            | 0.877                   |
| BF183_23DHT24J_wrm4                | 75.097            | 21.55            | 2.515             | 0            | 0            | 0                | 0            | 0            | 99.162            | 0.894                   |
| BF183_23DHT24J_wrm5                | 74.843            | 21.291           | 2.704             | 0            | 0            | 0.034            | 0.031        | 0            | 98.903            | 0.886                   |
| BF183_23DHT24J_wrm6                | 75.303            | 21.287           | 2.646             | 0            | 0.011        | 0.072            | 0            | 0            | 99.319            | 0.888                   |
| BF183_23DHT24J_wrm7                | 75.15             | 21.28            | 2.62              | 0            | 0.007        | 0                | 0.014        | 0            | 99.071            | 0.889                   |
| BF183_23DHT24J_wrm8                | 75.301            | 21.48            | 2.681             | 0            | 0            | 0                | 0            | 0.014        | 99.476            | 0.888                   |
| BF183_23DHT24J_wrm9                | 75.577            | 21.429           | 2.673             | 0.037        | 0.022        | 0.03             | 0            | 0.029        | 99.797            | 0.888                   |
| BF183_23DHT24J_wrm10               | 75.048            | 21.11            | 2.836             | 0            | 0.003        | 0                | 0            | 0            | 98.997            | 0.880                   |
| BF183_23DHT24J_wrm11               | 75.67             | 21.155           | 2.744             | 0.05         | 0.072        | 0.064            | 0            | 0            | 99.755            | 0.884                   |
| BF184_23DHT24J_wrm1-1              | 75.52             | 21.009           | 3.162             | 0            | 0            | 0                | 0.003        | 0            | 99.694            | 0.868                   |
| BF184_23DHT24J_wrm3                | 75.202            | 21.389           | 2.87              | 0            | 0.014        | 0                | 0            | 0            | 99.475            | 0.880                   |
| BF184_23DHT24J_wrm4                | 74.676            | 21.101           | 2.927             | 0            | 0.02         | 0                | 0.022        | 0            | 98.746            | 0.877                   |
| BF184_23DHT24J_wrm7                | 75.102            | 21.736           | 2.25              | 0            | 0            | 0                | 0            | 0            | 99.088            | 0.905                   |
| BF184_23DHT24J_wrm9                | 75.069            | 21.376           | 2.521             | 0.034        | 0.016        | 0                | 0            | 0            | 99.016            | 0.893                   |
| BF184_23DHT24J_wrm10               | 75.581            | 21.251           | 3.038             | 0            | 0.042        | 0                | 0            | 0.005        | 99.917            | 0.874                   |

|                          |        |        |        |       |       |        |       |       |         |       |
|--------------------------|--------|--------|--------|-------|-------|--------|-------|-------|---------|-------|
| BF184_23DHT24J_wrm11     | 75.717 | 21.527 | 2.509  | 0.022 | 0     | 0      | 0     | 0     | 99.775  | 0.894 |
| BF184_23DHT24J_wrm12     | 75.895 | 21.349 | 2.652  | 0     | 0.045 | 0.086  | 0     | 0     | 100.027 | 0.888 |
| BF184_23DHT24J_wrm13     | 74.77  | 21.526 | 2.557  | 0     | 0.093 | 0      | 0     | 0     | 98.946  | 0.893 |
| BF184_23DHT24J_wrm14     | 75.869 | 21.334 | 2.686  | 0     | 0.009 | 0.151  | 0     | 0.015 | 100.064 | 0.887 |
| BF184_23DHT24J_wrm15     | 75.26  | 20.719 | 3.223  | 0     | 0     | 0.069  | 0     | 0     | 99.271  | 0.864 |
| BF184_23DHT24J_wrm17     | 75.965 | 21.454 | 2.511  | 0     | 0     | 0      | 0     | 0     | 99.93   | 0.894 |
| BF184_23DHT24J_wrm18     | 75.547 | 21.511 | 2.532  | 0.05  | 0     | 0.037  | 0     | 0     | 99.677  | 0.893 |
| BF184_23DHT24J_wrm19     | 75.31  | 21.09  | 3.042  | 0     | 0     | 0.073  | 0     | 0     | 99.515  | 0.873 |
| BF186_23DHT24J_wrm1      | 75.489 | 21.51  | 2.502  | 0     | 0     | 0      | 0.02  | 0     | 99.521  | 0.895 |
| BF186_23DHT24J_wrm2      | 75.905 | 21.46  | 2.682  | 0     | 0     | 0      | 0     | 0     | 100.047 | 0.888 |
| BF186_23DHT24J_wrm3      | 74.912 | 21.297 | 2.698  | 0.012 | 0     | 0.048  | 0.001 | 0     | 98.968  | 0.886 |
| BF186_23DHT24J_wrm4      | 75.051 | 21.176 | 2.837  | 0     | 0     | 0      | 0.015 | 0.001 | 99.08   | 0.881 |
| BF186_23DHT24J_wrm5      | 75.61  | 21.55  | 2.397  | 0     | 0     | 0      | 0.008 | 0     | 99.565  | 0.899 |
| BF186_23DHT24J_wrm6      | 75.215 | 21.543 | 2.592  | 0     | 0     | 0.06   | 0.016 | 0     | 99.426  | 0.891 |
| BF186_23DHT24J_wrm7      | 75.583 | 21.76  | 2.354  | 0     | 0     | 0.048  | 0     | 0.006 | 99.751  | 0.901 |
| BF186_23DHT24J_wrm8      | 74.308 | 21.06  | 2.772  | 0     | 0     | 0.04   | 0     | 0     | 98.18   | 0.882 |
| BF186_23DHT24J_wrm9      | 75.089 | 21.6   | 2.426  | 0     | 0     | 0      | 0     | 0     | 99.115  | 0.898 |
| BF188_23DHT24J_1SW_wrm1  | 75.807 | 21.501 | 2.613  | 0     | 0     | 0      | 0.023 | 0     | 99.944  | 0.890 |
| BF188_23DHT24J_1_wrm2    | 75.69  | 21.193 | 2.948  | 0.021 | 0     | 0.026  | 0.003 | 0     | 99.881  | 0.877 |
| BF189_23DHT24J_1c_wrm1   | 76.012 | 21.862 | 2.415  | 0     | 0.076 | 0.055  | 0     | 0     | 100.42  | 0.899 |
| BF189_23DHT24J_1c_wrm2   | 75.27  | 21.374 | 2.927  | 0.017 | 0     | 0.051  | 0.016 | 0     | 99.655  | 0.878 |
| BF189_23DHT24J_2se_wrm1  | 75.169 | 21.396 | 2.611  | 0     | 0     | 0.064  | 0     | 0     | 99.24   | 0.890 |
| BF189_23DHT24J_2se_wrm2  | 75.336 | 21.65  | 2.383  | 0     | 0     | 0      | 0     | 0     | 99.369  | 0.900 |
| BF191_23DHT24J_wrm1      | 75.347 | 21.325 | 2.641  | 0     | 0.067 | 0      | 0.001 | 0     | 99.381  | 0.889 |
| BF191_23DHT24J_wrm2-1    | 75.195 | 21.224 | 2.504  | 0     | 0     | 0      | 0.009 | 0     | 98.932  | 0.893 |
| BF191_23DHT24J_wrm2-2    | 75.782 | 21.444 | 2.576  | 0     | 0.055 | 0.096  | 0.056 | 0.021 | 100.03  | 0.892 |
| BF191_23DHT24J_wrm3-1    | 75.432 | 19.893 | 4.169  | 0     | 0     | 0.096  | 0     | 0.014 | 99.604  | 0.825 |
| BF191_23DHT24J_wrm3-2    | 76.121 | 21.417 | 2.781  | 0     | 0     | 0.1    | 0.032 | 0.015 | 100.466 | 0.884 |
| BF197_23DHT24J_wrm1-1    | 75.993 | 21.016 | 2.722  | 0     | 0.01  | 0      | 0.005 | 0.004 | 99.75   | 0.884 |
| BF197_23DHT24J_wrm1-2    | 76.008 | 21.247 | 2.77   | 0     | 0     | 0      | 0.016 | 0     | 100.041 | 0.883 |
| BF197_23DHT24J_wrm2      | 75.419 | 21.416 | 2.441  | 0     | 0     | 0      | 0.028 | 0.011 | 99.315  | 0.897 |
| 23DHT24J (average, n=48) | 75.38  | 21.32  | 2.72   |       |       | 0.03   |       |       |         | 0.886 |
| %RSD                     | 0.59   | 1.46   | 11.35  |       |       | 133.60 |       |       |         | 1.45  |
| BF184_24MHP212A1_wrm1-1  | 75.344 | 5.215  | 19.059 | 0     | 0     | 0.219  | 0     | 0     | 99.837  | 0.213 |

Table S1

|                          |        |       |        |       |   |       |       |       |         |       |
|--------------------------|--------|-------|--------|-------|---|-------|-------|-------|---------|-------|
| BF184_24MHP212A1_wrm1-2  | 75.529 | 5.453 | 19.159 | 0     | 0 | 0.228 | 0     | 0     | 100.369 | 0.219 |
| BF184_24MHP212A1_wrm1-3  | 75.452 | 5.196 | 19.245 | 0     | 0 | 0.248 | 0.029 | 0     | 100.17  | 0.210 |
| BF184_24MHP212A1_wrm2-1  | 74.885 | 5.082 | 19.43  | 0     | 0 | 0.228 | 0     | 0     | 99.625  | 0.205 |
| BF184_24MHP212A1_wrm2-2  | 75.229 | 5.211 | 19.17  | 0     | 0 | 0.179 | 0     | 0     | 99.789  | 0.212 |
| BF184_24MHP212A1_wrm2-3  | 74.482 | 5.23  | 19.345 | 0     | 0 | 0.284 | 0     | 0     | 99.341  | 0.211 |
| BF184_24MHP212A1_wrm3-1  | 75.053 | 6.8   | 17.436 | 0     | 0 | 0.195 | 0     | 0     | 99.484  | 0.278 |
| BF184_24MHP212A1_wrm3-2  | 75.246 | 6.062 | 18.146 | 0     | 0 | 0.134 | 0     | 0.024 | 99.612  | 0.248 |
| BF184_24MHP212A1_wrm4-1  | 75.304 | 5.065 | 19.242 | 0     | 0 | 0.317 | 0     | 0     | 99.928  | 0.206 |
| BF184_24MHP212A1_wrm4-2  | 74.681 | 5.145 | 19.374 | 0     | 0 | 0.413 | 0     | 0     | 99.613  | 0.208 |
| BF184_24MHP212A1_wrm4-3  | 75.287 | 5.185 | 19.382 | 0     | 0 | 0.255 | 0     | 0     | 100.109 | 0.209 |
| BF184_24MHP212A1_wrm5-1  | 75.818 | 6.707 | 17.634 | 0     | 0 | 0.305 | 0.001 | 0     | 100.465 | 0.273 |
| BF184_24MHP212A1_wrm5-2  | 75.493 | 5.798 | 18.522 | 0     | 0 | 0.239 | 0.027 | 0     | 100.079 | 0.236 |
| BF184_24MHP212A1_wrm5-3  | 74.734 | 6.175 | 18.165 | 0     | 0 | 0.542 | 0.013 | 0     | 99.629  | 0.251 |
| BF184_24MHP212A1_wrm5-4  | 75.292 | 5.971 | 18.482 | 0     | 0 | 0.223 | 0     | 0     | 99.968  | 0.242 |
| BF184_24MHP212A1_wrm5-5  | 74.804 | 5.997 | 18.361 | 0     | 0 | 0.336 | 0.033 | 0     | 99.531  | 0.244 |
| BF184_24MHP212A1_wrm6-1  | 75.009 | 6.865 | 17.623 | 0     | 0 | 0.239 | 0.012 | 0     | 99.748  | 0.278 |
| BF184_24MHP212A1_wrm6-2  | 75.304 | 5.749 | 18.634 | 0     | 0 | 0.324 | 0     | 0.007 | 100.018 | 0.233 |
| BF184_24MHP212A1_wrm6-3  | 75.374 | 5.822 | 18.745 | 0     | 0 | 0.388 | 0     | 0     | 100.329 | 0.235 |
| BF184_24MHP212A1_wrm6-4  | 75.198 | 6.295 | 18.108 | 0     | 0 | 0.292 | 0.001 | 0.011 | 99.905  | 0.256 |
| BF184_24MHP212A1_wrm6-5  | 74.582 | 6.061 | 18.459 | 0     | 0 | 0.303 | 0     | 0     | 99.405  | 0.245 |
| 24MHP212 (average, n=21) | 75.15  | 5.77  | 18.65  |       |   |       |       |       |         | 0.234 |
| %RSD                     | 0.46   | 10.18 | 3.41   |       |   |       |       |       |         | 10.38 |
| BF184_WHF1_wrm1-1        | 74.829 | 0.406 | 23.755 | 0.206 | 0 | 0.146 | 0     | 0     | 99.342  | 0.017 |
| BF184_WHF1_wrm1-2        | 75.5   | 0.469 | 23.804 | 0.027 | 0 | 0.108 | 0.017 | 0     | 99.925  | 0.019 |
| BF184_WHF1_wrm1-3        | 74.675 | 0.33  | 23.774 | 0.186 | 0 | 0.056 | 0     | 0.001 | 99.022  | 0.014 |
| BF184_WHF1_wrm2-1        | 75.763 | 0.431 | 23.895 | 0     | 0 | 0.24  | 0.013 | 0.02  | 100.362 | 0.017 |
| BF184_WHF1_wrm2-2        | 76.03  | 1.432 | 22.947 | 0     | 0 | 0.052 | 0     | 0     | 100.461 | 0.058 |
| BF184_WHF1_wrm2-3        | 75.247 | 0.582 | 23.667 | 0     | 0 | 0.116 | 0.001 | 0.001 | 99.614  | 0.024 |
| BF184_WHF1_wrm3-1        | 75.502 | 0.309 | 23.436 | 0     | 0 | 0.14  | 0     | 0     | 99.387  | 0.013 |
| BF184_WHF1_wrm3-2        | 75.9   | 0.81  | 22.064 | 0     | 0 | 0.152 | 0.037 | 0     | 98.963  | 0.035 |
| BF184_WHF1_wrm4-1        | 75.514 | 1.807 | 22.448 | 0     | 0 | 0.06  | 0     | 0.021 | 99.85   | 0.074 |
| BF184_WHF1_wrm4-2        | 75.135 | 0.07  | 24.211 | 0     | 0 | 0.259 | 0.009 | 0     | 99.684  | 0.003 |
| BF184_WHF1_wrm4-3        | 76.319 | 1.392 | 22.63  | 0     | 0 | 0.044 | 0     | 0.016 | 100.401 | 0.057 |
| BF184_WHF1_wrm5-1        | 75.51  | 2.418 | 21.707 | 0     | 0 | 0.048 | 0     | 0     | 99.683  | 0.099 |

Table S1

|                       |        |        |        |       |   |       |       |       |         |        |
|-----------------------|--------|--------|--------|-------|---|-------|-------|-------|---------|--------|
| BF184_WHF1_wrm5-2     | 75.331 | 3.832  | 20.33  | 0     | 0 | 0.048 | 0     | 0.001 | 99.542  | 0.157  |
| BF184_WHF1_wrm5-3     | 74.429 | 0.164  | 23.861 | 0.156 | 0 | 0.115 | 0     | 0.037 | 98.762  | 0.007  |
| BF184_WHF1_wrm6-1     | 75.157 | 3.365  | 21.041 | 0.084 | 0 | 0.108 | 0.012 | 0     | 99.767  | 0.136  |
| BF184_WHF1_wrm6-2     | 75.743 | 3.438  | 20.876 | 0.09  | 0 | 0.219 | 0.019 | 0     | 100.385 | 0.140  |
| BF184_WHF1_wrm6-3     | 75.42  | 2.657  | 21.858 | 0     | 0 | 0.171 | 0     | 0     | 100.106 | 0.107  |
| BF184_WHF1_wrm7-1     | 75.156 | 0.093  | 24.138 | 0     | 0 | 0.152 | 0.028 | 0     | 99.567  | 0.004  |
| BF184_WHF1_wrm7-2     | 75.604 | 0.072  | 24.144 | 0     | 0 | 0.291 | 0.008 | 0     | 100.119 | 0.003  |
| BF184_WHF1_wrm7-3     | 75.782 | 1.012  | 20.711 | 0     | 0 | 0.137 | 0.013 | 0     | 97.655  | 0.046  |
| BF184_WHF1_wrm8-1     | 75.546 | 0.045  | 24.414 | 0.167 | 0 | 0.092 | 0     | 0     | 100.264 | 0.002  |
| BF184_WHF1_wrm8-2     | 74.663 | 0.082  | 24.381 | 0.067 | 0 | 0.123 | 0     | 0     | 99.316  | 0.003  |
| WHF1 (average, n=22)  | 75.40  | 1.15   | 22.91  |       |   | 0.13  |       |       |         | 0.047  |
| %RSD                  | 0.62   | 107.59 | 5.78   |       |   | 54.28 |       |       |         | 106.72 |
| BF184_WHF11_wrm1-1    | 75.132 | 18.08  | 6.261  | 0     | 0 | 0     | 0.015 | 0     | 99.488  | 0.740  |
| BF184_WHF11_wrm2-1    | 75.606 | 16.063 | 8.274  | 0     | 0 | 0     | 0.006 | 0     | 99.949  | 0.657  |
| BF184_WHF11_wrm2-2    | 75.432 | 16.297 | 8.01   | 0.003 | 0 | 0.135 | 0.022 | 0.007 | 99.906  | 0.668  |
| BF184_WHF11_wrm2-3    | 75.351 | 15.895 | 8.214  | 0     | 0 | 0.064 | 0.013 | 0     | 99.537  | 0.656  |
| BF184_WHF11_wrm3-1    | 75.071 | 16.476 | 7.834  | 0     | 0 | 0.02  | 0.027 | 0     | 99.428  | 0.675  |
| BF184_WHF11_wrm3-2    | 75.725 | 16.304 | 7.935  | 0     | 0 | 0.024 | 0.02  | 0     | 100.008 | 0.670  |
| BF184_WHF11_wrm3-3    | 75.499 | 16.047 | 8.13   | 0     | 0 | 0.08  | 0.017 | 0.016 | 99.789  | 0.661  |
| BF184_WHF11_wrm4-1    | 75.569 | 16.169 | 8.198  | 0     | 0 | 0     | 0     | 0.028 | 99.964  | 0.661  |
| BF184_WHF11_wrm4-2    | 75.247 | 16.773 | 7.593  | 0     | 0 | 0.052 | 0     | 0     | 99.665  | 0.686  |
| BF184_WHF11_wrm4-3    | 75.764 | 15.943 | 8.417  | 0     | 0 | 0     | 0     | 0.04  | 100.164 | 0.652  |
| BF184_WHF11_wrm5-1    | 75.091 | 15.222 | 9.221  | 0     | 0 | 0.219 | 0     | 0.002 | 99.755  | 0.620  |
| BF184_WHF11_wrm5-2    | 75.32  | 15.955 | 8.423  | 0     | 0 | 0.099 | 0     | 0     | 99.797  | 0.652  |
| BF184_WHF11_wrm5-3    | 75.084 | 17.3   | 6.795  | 0     | 0 | 0.151 | 0.003 | 0     | 99.333  | 0.715  |
| BF184_WHF11_wrm6-1    | 74.626 | 15.8   | 8.696  | 0     | 0 | 0.183 | 0.013 | 0     | 99.318  | 0.642  |
| BF184_WHF11_wrm6-2    | 74.879 | 16.599 | 7.706  | 0     | 0 | 0.056 | 0     | 0     | 99.24   | 0.680  |
| BF184_WHF11_wrm7-1    | 75.671 | 16.026 | 8.515  | 0     | 0 | 0.095 | 0.021 | 0     | 100.328 | 0.650  |
| BF184_WHF11_wrm7-2    | 75.547 | 16.581 | 7.827  | 0     | 0 | 0     | 0     | 0.01  | 99.965  | 0.677  |
| BF184_WHF11_wrm7-3    | 75.485 | 16.66  | 7.745  | 0     | 0 | 0.147 | 0     | 0     | 100.037 | 0.680  |
| BF184_WHF11_wrm8-1    | 75.621 | 16.498 | 7.968  | 0     | 0 | 0.06  | 0     | 0     | 100.147 | 0.672  |
| BF184_WHF11_wrm8-2    | 76.051 | 16.672 | 7.675  | 0     | 0 | 0.012 | 0     | 0     | 100.41  | 0.682  |
| WHF11 (average, n=20) | 75.39  | 16.37  | 7.97   |       |   | 0.07  |       |       |         | 0.670  |

Table S1

| %RSD                  | 0.45   | 3.67   | 7.99   |       |   | 96.53  |       |       |         | 3.84  |
|-----------------------|--------|--------|--------|-------|---|--------|-------|-------|---------|-------|
| BF184_WHF12_wrm1-1    | 74.816 | 16.603 | 7.703  | 0     | 0 | 0.008  | 0     | 0.01  | 99.14   | 0.680 |
| BF184_WHF12_wrm1-2    | 75.205 | 16.711 | 7.819  | 0     | 0 | 0.008  | 0     | 0     | 99.743  | 0.678 |
| BF184_WHF12_wrm2-1    | 75.403 | 15.659 | 8.857  | 0     | 0 | 0      | 0     | 0     | 99.919  | 0.636 |
| BF184_WHF12_wrm2-2    | 75.884 | 15.5   | 8.739  | 0     | 0 | 0.056  | 0.008 | 0     | 100.187 | 0.637 |
| BF184_WHF12_wrm3-1    | 76.091 | 16.301 | 7.964  | 0     | 0 | 0.099  | 0.022 | 0     | 100.477 | 0.669 |
| BF184_WHF12_wrm3-2    | 75.31  | 16.595 | 7.666  | 0     | 0 | 0      | 0     | 0     | 99.571  | 0.681 |
| BF184_WHF12_wrm4-1    | 75.552 | 17.174 | 7.287  | 0     | 0 | 0.083  | 0     | 0.049 | 100.145 | 0.699 |
| BF184_WHF12_wrm4-2    | 75.577 | 16.411 | 7.791  | 0     | 0 | 0      | 0.021 | 0     | 99.8    | 0.675 |
| BF184_WHF12_wrm5-1    | 74.868 | 16.891 | 7.644  | 0     | 0 | 0.016  | 0.019 | 0     | 99.438  | 0.686 |
| BF184_WHF12_wrm5-2    | 74.375 | 16.604 | 7.728  | 0     | 0 | 0      | 0.004 | 0     | 98.711  | 0.680 |
| BF184_WHF12_wrm6-1    | 75.607 | 16.469 | 8.03   | 0     | 0 | 0      | 0     | 0.018 | 100.124 | 0.669 |
| BF184_WHF12_wrm6-2    | 74.924 | 17.111 | 7.329  | 0     | 0 | 0.186  | 0     | 0     | 99.55   | 0.697 |
| BF184_WHF12_wrm6-3    | 75.929 | 16.658 | 7.718  | 0     | 0 | 0.024  | 0     | 0     | 100.329 | 0.681 |
| BF184_WHF12_wrm7-1    | 75.783 | 16.857 | 7.449  | 0     | 0 | 0.163  | 0     | 0     | 100.252 | 0.691 |
| BF184_WHF12_wrm7-2    | 75.357 | 17.112 | 7.289  | 0     | 0 | 0.052  | 0     | 0     | 99.81   | 0.699 |
| BF184_WHF12_wrm7-3    | 75.674 | 16.365 | 7.931  | 0     | 0 | 0      | 0.031 | 0     | 100.001 | 0.671 |
| WHF12 (average, n=16) | 75.40  | 16.56  | 7.81   |       |   | 0.04   |       |       |         | 0.677 |
| %RSD                  | 0.62   | 2.83   | 5.75   |       |   | 138.72 |       |       |         | 2.75  |
| BF184_WHF2_wrm1-1     | 75.006 | 0.045  | 24.196 | 0.084 | 0 | 0.071  | 0     | 0     | 99.402  | 0.002 |
| BF184_WHF2_wrm1-2     | 75.909 | 0.038  | 24.29  | 0     | 0 | 0.144  | 0.016 | 0     | 100.397 | 0.002 |
| BF184_WHF2_wrm1-3     | 75.924 | 0.036  | 24.474 | 0.054 | 0 | 0.044  | 0     | 0     | 100.532 | 0.001 |
| BF184_WHF2_wrm2-1     | 74.982 | 0.075  | 24.22  | 0     | 0 | 0      | 0.02  | 0.02  | 99.317  | 0.003 |
| BF184_WHF2_wrm2-2     | 75.633 | 0.05   | 24.443 | 0     | 0 | 0.207  | 0     | 0     | 100.333 | 0.002 |
| BF184_WHF2_wrm2-3     | 75.274 | 0.037  | 24.183 | 0.141 | 0 | 0.139  | 0.002 | 0     | 99.776  | 0.002 |
| BF184_WHF2_wrm3-1     | 75.432 | 0.075  | 24.426 | 0     | 0 | 0.263  | 0     | 0     | 100.196 | 0.003 |
| BF184_WHF2_wrm3-2     | 75.438 | 0.044  | 24.303 | 0     | 0 | 0.203  | 0.024 | 0     | 100.012 | 0.002 |
| BF184_WHF2_wrm3-3     | 74.885 | 0.027  | 23.907 | 0     | 0 | 0.243  | 0     | 0     | 99.062  | 0.001 |
| BF184_WHF2_wrm4-1     | 75.162 | 0.033  | 24.44  | 0     | 0 | 0.099  | 0.004 | 0     | 99.738  | 0.001 |
| BF184_WHF2_wrm4-2     | 75.325 | 0.036  | 24.151 | 0     | 0 | 0.207  | 0.011 | 0     | 99.73   | 0.001 |
| BF184_WHF2_wrm4-3     | 75.882 | 0.041  | 24.197 | 0.011 | 0 | 0.147  | 0.011 | 0     | 100.289 | 0.002 |
| BF184_WHF2_wrm5-1     | 74.792 | 0.036  | 24.231 | 0     | 0 | 0.286  | 0.001 | 0.032 | 99.378  | 0.001 |
| BF184_WHF2_wrm5-2     | 75.467 | 0.014  | 24.378 | 0     | 0 | 0.191  | 0     | 0     | 100.05  | 0.001 |

Table S1

|                       |        |        |        |       |       |       |       |       |         |       |
|-----------------------|--------|--------|--------|-------|-------|-------|-------|-------|---------|-------|
| BF184_WHF2_wrm5-3     | 75.278 | 0.077  | 24.095 | 0.015 | 0     | 0.103 | 0     | 0     | 99.568  | 0.003 |
| BF184_WHF2_wrm6-1     | 75.121 | 0.048  | 24.211 | 0     | 0     | 0.143 | 0     | 0.007 | 99.53   | 0.002 |
| BF184_WHF2_wrm6-2     | 75.663 | 0.069  | 24.18  | 0     | 0     | 0.079 | 0     | 0.008 | 99.999  | 0.003 |
| BF184_WHF2_wrm6-3     | 75.516 | 0.053  | 24.241 | 0.1   | 0     | 0.198 | 0     | 0     | 100.108 | 0.002 |
| BF184_WHF2_wrm7-1     | 75.028 | 0.016  | 24.376 | 0.027 | 0     | 0.079 | 0     | 0     | 99.526  | 0.001 |
| BF184_WHF2_wrm7-2     | 75.715 | 0.014  | 24.33  | 0.108 | 0     | 0.246 | 0     | 0.015 | 100.428 | 0.001 |
| BF184_WHF2_wrm7-3     | 75.296 | 0.063  | 24.223 | 0     | 0     | 0.127 | 0     | 0.015 | 99.724  | 0.003 |
| WHF2 (average, n=21)  | 75.37  | 0.04   | 24.26  |       |       | 0.15  |       |       |         | 0.002 |
| %RSD                  | 0.45   | 43.61  | 0.56   |       |       | 50.07 |       |       |         | 43.60 |
| BF184_WHF3_wrm1-1     | 75.108 | 21.426 | 3.022  | 0     | 0.02  | 0.025 | 0.007 | 0     | 99.608  | 0.875 |
| BF184_WHF3_wrm1-2     | 74.264 | 19.495 | 4.738  | 0     | 0.01  | 0.32  | 0     | 0     | 98.827  | 0.802 |
| BF184_WHF3_wrm2-1     | 75.039 | 22.065 | 2.602  | 0     | 0     | 0.147 | 0     | 0     | 99.853  | 0.893 |
| BF184_WHF3_wrm3-1     | 75.164 | 19.593 | 4.654  | 0     | 0     | 0.092 | 0.026 | 0.013 | 99.542  | 0.806 |
| BF184_WHF3_wrm3-2     | 75.503 | 20.864 | 3.306  | 0     | 0     | 0.148 | 0.016 | 0.029 | 99.866  | 0.862 |
| BF184_WHF3_wrm3-3     | 75.258 | 19.588 | 4.883  | 0     | 0     | 0.144 | 0     | 0     | 99.873  | 0.798 |
| BF184_WHF3_wrm4-1     | 75.529 | 21.129 | 3.326  | 0     | 0     | 0.072 | 0.023 | 0     | 100.079 | 0.862 |
| BF184_WHF3_wrm4-2     | 75.379 | 20.824 | 3.635  | 0     | 0.03  | 0.172 | 0.012 | 0     | 100.052 | 0.850 |
| BF184_WHF3_wrm5-1     | 74.868 | 20.693 | 3.623  | 0     | 0     | 0.068 | 0.004 | 0     | 99.256  | 0.849 |
| BF184_WHF3_wrm5-2     | 74.725 | 20.364 | 4.13   | 0     | 0.051 | 0.223 | 0.03  | 0     | 99.523  | 0.830 |
| BF184_WHF3_wrm5-3     | 75.309 | 20.87  | 3.382  | 0     | 0     | 0.255 | 0     | 0     | 99.816  | 0.859 |
| BF184_WHF3_wrm6-1     | 75.9   | 20.735 | 3.327  | 0.041 | 0     | 0.144 | 0     | 0     | 100.147 | 0.860 |
| BF184_WHF3_wrm6-2     | 75.228 | 20.984 | 3.289  | 0     | 0     | 0.287 | 0     | 0     | 99.788  | 0.863 |
| BF184_WHF3_wrm6-3     | 75.429 | 20.515 | 3.372  | 0     | 0.012 | 0.188 | 0.008 | 0     | 99.524  | 0.857 |
| BF184_WHF3_wrm7-1     | 75.77  | 20.727 | 3.497  | 0     | 0     | 0.28  | 0     | 0     | 100.274 | 0.854 |
| BF184_WHF3_wrm7-2     | 75.58  | 20.991 | 3.416  | 0     | 0     | 0.168 | 0.029 | 0.005 | 100.189 | 0.859 |
| BF184_WHF3_wrm7-3     | 75.772 | 20.397 | 4.16   | 0     | 0     | 0.08  | 0     | 0     | 100.409 | 0.829 |
| WHF3 (average, n=17)  | 75.28  | 20.66  | 3.67   |       |       | 0.17  |       |       |         | 0.85  |
| %RSD                  | 0.55   | 3.19   | 17.21  |       |       | 51.43 |       |       |         | 3.08  |
| BF191_24MHP889_wrm1-1 | 75.097 | 14.99  | 9.099  | 0     | 0     | 0.042 | 0     | 0.012 | 99.24   | 0.619 |
| BF191_24MHP889_wrm1-2 | 75.308 | 14.363 | 9.476  | 0     | 0     | 0     | 0.033 | 0     | 99.18   | 0.599 |
| BF191_24MHP889_wrm2-1 | 75.592 | 16.469 | 7.508  | 0     | 0     | 0     | 0     | 0.02  | 99.589  | 0.684 |
| BF191_24MHP889_wrm2-2 | 75.848 | 14.682 | 9.31   | 0     | 0     | 0.042 | 0     | 0     | 99.882  | 0.609 |

|                          |        |        |        |       |   |        |       |       |         |       |
|--------------------------|--------|--------|--------|-------|---|--------|-------|-------|---------|-------|
| BF191_24MHP889_wrm3-1    | 75.658 | 14.561 | 9.745  | 0     | 0 | 0.025  | 0     | 0     | 99.989  | 0.596 |
| BF191_24MHP889_wrm3-2    | 75.623 | 12.549 | 11.312 | 0     | 0 | 0.008  | 0.058 | 0     | 99.55   | 0.523 |
| BF191_24MHP889_wrm4-1    | 76.161 | 11.253 | 12.871 | 0     | 0 | 0.008  | 0     | 0     | 100.293 | 0.463 |
| BF191_24MHP889_wrm4-2    | 75.353 | 13.421 | 10.718 | 0     | 0 | 0.034  | 0.011 | 0.001 | 99.538  | 0.553 |
| BF191_24MHP889_wrm5-1    | 75.568 | 14.16  | 10.209 | 0     | 0 | 0.055  | 0     | 0     | 99.992  | 0.578 |
| BF191_24MHP889_wrm5-2    | 75.626 | 9.826  | 14.299 | 0.013 | 0 | 0.025  | 0     | 0.004 | 99.793  | 0.404 |
| BF191_24MHP889_wrm5B-1   | 75.308 | 15.277 | 8.924  | 0     | 0 | 0.064  | 0     | 0     | 99.573  | 0.628 |
| BF191_24MHP889_wrm6-1    | 75.217 | 12.355 | 11.404 | 0     | 0 | 0.038  | 0.002 | 0     | 99.016  | 0.517 |
| BF191_24MHP889_wrm6-2    | 75.932 | 12.241 | 11.957 | 0     | 0 | 0.147  | 0     | 0     | 100.277 | 0.503 |
| BF191_24MHP889_wrm7-1    | 75.499 | 11.925 | 12.103 | 0     | 0 | 0.101  | 0     | 0     | 99.628  | 0.493 |
| BF191_24MHP889_wrm7-2    | 77.897 | 13.218 | 11.54  | 0     | 0 | 0.055  | 0.028 | 0     | 102.738 | 0.531 |
| BF191_24MHP889_wrm8-1    | 75.14  | 16.162 | 7.885  | 0     | 0 | 0.05   | 0     | 0     | 99.237  | 0.669 |
| BF191_24MHP889_wrm8-2    | 73.849 | 14.38  | 9.588  | 0     | 0 | 0      | 0     | 0.002 | 97.819  | 0.597 |
| BF191_24MHP889_wrm8-3    | 75.388 | 11.254 | 12.766 | 0     | 0 | 0.013  | 0     | 0     | 99.421  | 0.465 |
| BF191_24MHP889_wrm9-1    | 75.769 | 14.726 | 9.228  | 0     | 0 | 0      | 0     | 0     | 99.723  | 0.612 |
| 24MHP889 (average, n=19) | 75.57  | 13.57  | 10.52  |       |   | 0.04   |       |       |         | 0.56  |
| %RSD                     | 0.97   | 13.13  | 17.10  |       |   | 101.79 |       |       |         | 13.28 |

**GYIG-EMP-27**  
**Session-260304 (JEOL8230)**

| Comment | WO3 | FeO | MnO | TiO2 | UO2 | Nb2O5 | SnO2 | Sb2O5 | Total |
|---------|-----|-----|-----|------|-----|-------|------|-------|-------|
|---------|-----|-----|-----|------|-----|-------|------|-------|-------|

|                                    |                   |                   |                   |              |                  |                  |              |              |                    |                         |
|------------------------------------|-------------------|-------------------|-------------------|--------------|------------------|------------------|--------------|--------------|--------------------|-------------------------|
| BF184_24MHP12B_1.1                 | 75.986            | 4.294             | 19.828            | 0            | 0                | 0.342            | 0.003        | 0            | 100.453            | 0.176                   |
| BF184_24MHP12B_2.1                 | 75.999            | 5.355             | 19.006            | 0            | 0                | 0.204            | 0            | 0            | 100.564            | 0.218                   |
| BF184_24MHP12B_6.1                 | 76.026            | 3.463             | 20.972            | 0            | 0                | 0.211            | 0.007        | 0            | 100.679            | 0.140                   |
| BF184_24MHP12B_7.1                 | 75.847            | 4.264             | 20.122            | 0            | 0.025            | 0.116            | 0            | 0            | 100.374            | 0.173                   |
| BF184_24MHP12B_8.1                 | 75.492            | 3.245             | 21.175            | 0            | 0.006            | 0.377            | 0.004        | 0            | 100.299            | 0.131                   |
| BF210_24MHP12B_1.1                 | 75.987            | 4.97              | 19.094            | 0            | 0.074            | 0.129            | 0            | 0            | 100.254            | 0.204                   |
| <del>BF210_24MHP12B_2.1</del>      | <del>75.962</del> | <del>10.319</del> | <del>13.897</del> | <del>0</del> | <del>0.017</del> | <del>0.267</del> | <del>0</del> | <del>0</del> | <del>100.462</del> | 0.423 outlier; rejected |
| BF210_24MHP12B_3.1                 | 75.69             | 3.465             | 20.832            | 0            | 0.042            | 0.108            | 0.024        | 0.009        | 100.17             | 0.141                   |
| BF210_24MHP12B_4.1                 | 75.911            | 3.769             | 20.654            | 0            | 0.019            | 0.151            | 0            | 0            | 100.504            | 0.153                   |
| BF210_24MHP12B_5.1                 | 76.551            | 4.576             | 19.681            | 0            | 0                | 0.04             | 0            | 0            | 100.848            | 0.187                   |
| BF210_24MHP12B_6.1                 | 75.708            | 4.553             | 19.649            | 0            | 0                | 0.277            | 0.009        | 0            | 100.196            | 0.186                   |
| BF210_24MHP12B_7.1                 | 75.518            | 4.444             | 19.828            | 0            | 0.018            | 0.164            | 0.032        | 0            | 100.004            | 0.181                   |
| BF210_24MHP12B_8.1                 | 75.586            | 4.327             | 20.26             | 0            | 0.096            | 0.382            | 0.009        | 0            | 100.66             | 0.174                   |
| BF210_24MHP12B_9.1                 | 75.549            | 4.118             | 20.299            | 0            | 0                | 0.102            | 0            | 0            | 100.068            | 0.167                   |
| <del>BF210_24MHP12B_10.1</del>     | <del>76.283</del> | <del>10.741</del> | <del>13.553</del> | <del>0</del> | <del>0.016</del> | <del>0.249</del> | <del>0</del> | <del>0</del> | <del>100.842</del> | 0.439 outlier; rejected |
| BF211_24MHP12B_1.1                 | 76.055            | 3.716             | 20.695            | 0            | 0.024            | 0.214            | 0.022        | 0.015        | 100.741            | 0.151                   |
| BF211_24MHP12B_2.1                 | 76.124            | 3.486             | 21.164            | 0            | 0.028            | 0.225            | 0.011        | 0            | 101.038            | 0.140                   |
| BF211_24MHP12B_3.1                 | 75.506            | 4.194             | 20.034            | 0            | 0                | 0.24             | 0            | 0            | 99.974             | 0.171                   |
| BF211_24MHP12B_4.1                 | 76.443            | 2.605             | 21.877            | 0            | 0                | 0.149            | 0            | 0            | 101.074            | 0.105                   |
| BF211_24MHP12B_5.1                 | 75.607            | 4.402             | 20.051            | 0            | 0.041            | 0.254            | 0            | 0            | 100.355            | 0.178                   |
| BF288_24MHP12B_1.1                 | 75.95             | 3.589             | 21.106            | 0            | 0                | 0.318            | 0.012        | 0            | 100.975            | 0.144                   |
| BF288_24MHP12B_2.1                 | 75.553            | 3.72              | 20.734            | 0            | 0                | 0.211            | 0            | 0            | 100.218            | 0.150                   |
| BF288_24MHP12B_3.1                 | 75.495            | 5.493             | 18.824            | 0            | 0.012            | 0.161            | 0            | 0.004        | 99.989             | 0.224                   |
| BF288_24MHP12B_4.1                 | 75.714            | 2.68              | 21.631            | 0            | 0                | 0.165            | 0            | 0            | 100.19             | 0.109                   |
| BF288_24MHP12B_5.1                 | 75.819            | 5.056             | 19.331            | 0            | 0.066            | 0.279            | 0.031        | 0            | 100.582            | 0.205                   |
| 24MHP12B (average, n=23 out of 25) | 75.83             | 4.08              | 20.30             |              |                  | 0.21             |              |              |                    | 0.166                   |
| %RSD                               | 0.39              | 18.69             | 4.11              |              |                  | 43.05            |              |              |                    | 18.98                   |
| BF184_23DHT-24J_1.1                | 75.655            | 21.105            | 2.738             | 0            | 0.061            | 0.033            | 0.023        | 0            | 99.615             | 0.884                   |
| BF184_23DHT-24J_3.1                | 75.751            | 21.163            | 2.925             | 0            | 0.056            | 0                | 0            | 0            | 99.895             | 0.877                   |
| BF184_23DHT-24J_4.1                | 75.81             | 21.445            | 2.481             | 0            | 0.047            | 0                | 0.048        | 0            | 99.831             | 0.895                   |
| BF184_23DHT-24J_7.1                | 75.761            | 21.756            | 2.36              | 0            | 0                | 0.07             | 0            | 0.026        | 99.973             | 0.901                   |
| BF184_23DHT-24J_9.1                | 75.96             | 21.209            | 2.583             | 0.03         | 0                | 0                | 0            | 0            | 99.782             | 0.890                   |
| BF184_23DHT-24J_10.1               | 75.755            | 20.992            | 3.038             | 0            | 0.031            | 0.081            | 0            | 0            | 99.897             | 0.872                   |

Table S1

|                      |        |        |       |       |       |       |       |       |         |       |
|----------------------|--------|--------|-------|-------|-------|-------|-------|-------|---------|-------|
| BF184_23DHT-24J_11.1 | 75.591 | 21.581 | 2.451 | 0     | 0     | 0     | 0     | 0     | 99.623  | 0.897 |
| BF184_23DHT-24J_12.1 | 75.795 | 21.12  | 2.582 | 0     | 0     | 0     | 0     | 0     | 99.497  | 0.890 |
| BF184_23DHT-24J_13.1 | 75.425 | 21.066 | 2.545 | 0     | 0.032 | 0.004 | 0     | 0     | 99.072  | 0.891 |
| BF184_23DHT-24J_14.1 | 75.844 | 21.028 | 2.692 | 0     | 0     | 0.018 | 0.007 | 0     | 99.589  | 0.885 |
| BF184_23DHT-24J_15.1 | 76.299 | 20.995 | 3.038 | 0     | 0     | 0.026 | 0     | 0     | 100.358 | 0.872 |
| BF184_23DHT-24J_17.1 | 75.989 | 20.963 | 2.723 | 0     | 0.035 | 0     | 0     | 0     | 99.71   | 0.884 |
| BF184_23DHT-24J_18.1 | 75.49  | 21.352 | 2.458 | 0     | 0.018 | 0     | 0     | 0     | 99.318  | 0.896 |
| BF210_23DHT-24J_1.1  | 75.046 | 20.08  | 3.896 | 0     | 0.024 | 0.073 | 0.024 | 0     | 99.143  | 0.836 |
| BF210_23DHT-24J_2.1  | 76.139 | 20.925 | 2.899 | 0     | 0     | 0     | 0     | 0     | 99.963  | 0.877 |
| BF210_23DHT-24J_3.1  | 75.941 | 21.461 | 2.458 | 0.023 | 0.006 | 0.018 | 0     | 0     | 99.907  | 0.896 |
| BF210_23DHT-24J_4.1  | 75.272 | 20.74  | 3.389 | 0     | 0.023 | 0.243 | 0.019 | 0     | 99.686  | 0.858 |
| BF210_23DHT-24J_5.1  | 76.14  | 21.2   | 2.551 | 0     | 0     | 0     | 0.045 | 0     | 99.936  | 0.891 |
| BF210_23DHT-24J_8.1  | 75.519 | 20.933 | 3.209 | 0     | 0     | 0.04  | 0.023 | 0     | 99.724  | 0.866 |
| BF210_23DHT-24J_9.1  | 75.822 | 21.377 | 2.581 | 0     | 0     | 0     | 0     | 0     | 99.78   | 0.891 |
| BF210_23DHT-24J_10.1 | 75.433 | 21.209 | 2.146 | 0     | 0.005 | 0.059 | 0.002 | 0     | 98.854  | 0.907 |
| BF210_23DHT-24J_11.1 | 75.861 | 21.505 | 2.549 | 0.012 | 0.039 | 0     | 0     | 0.018 | 99.984  | 0.893 |
| BF210_23DHT-24J_12.1 | 76.039 | 21.237 | 2.881 | 0     | 0     | 0.018 | 0.01  | 0.01  | 100.195 | 0.879 |
| BF211_24MHP-24J_1.1  | 76.173 | 21.489 | 2.4   | 0     | 0.024 | 0.04  | 0     | 0     | 100.126 | 0.898 |
| BF211_24MHP-24J_2.1  | 76.341 | 21.746 | 2.384 | 0     | 0.033 | 0.066 | 0.015 | 0     | 100.585 | 0.900 |
| BF211_24MHP-24J_3.1  | 75.978 | 21.378 | 2.625 | 0     | 0.037 | 0     | 0     | 0     | 100.018 | 0.889 |
| BF211_24MHP-24J_5.1  | 76.457 | 21.686 | 2.617 | 0     | 0.063 | 0.007 | 0     | 0     | 100.83  | 0.891 |
| BF211_24MHP-24J_5.2  | 76.135 | 21.493 | 2.422 | 0.017 | 0.066 | 0     | 0     | 0.039 | 100.172 | 0.898 |
| BF211_24MHP-24J_6.1  | 76.266 | 21.512 | 2.51  | 0     | 0     | 0.011 | 0     | 0.027 | 100.326 | 0.894 |
| BF211_24MHP-24J_7.1  | 76.329 | 21.19  | 2.471 | 0     | 0.025 | 0     | 0.034 | 0     | 100.049 | 0.894 |
| BF211_24MHP-24J_7.2  | 76.225 | 21.281 | 2.556 | 0     | 0.074 | 0     | 0     | 0     | 100.136 | 0.892 |
| BF211_24MHP-24J_8.1  | 76.086 | 20.816 | 3.17  | 0     | 0.004 | 0.209 | 0.006 | 0     | 100.291 | 0.866 |
| BF211_24MHP-24J_9.1  | 75.889 | 21.411 | 2.511 | 0     | 0     | 0.066 | 0     | 0     | 99.877  | 0.894 |
| BF211_24MHP-24J_9.2  | 75.919 | 21.43  | 2.698 | 0     | 0     | 0     | 0     | 0.016 | 100.063 | 0.887 |
| BF211_24MHP-24J_10.1 | 76.274 | 21.589 | 2.472 | 0     | 0.017 | 0.018 | 0.016 | 0     | 100.386 | 0.896 |
| BF211_24MHP-24J_11.1 | 76.283 | 21.728 | 2.523 | 0     | 0.006 | 0     | 0.019 | 0     | 100.559 | 0.895 |
| BF211_24MHP-24J_12.1 | 74.841 | 21.239 | 2.766 | 0     | 0     | 0     | 0     | 0     | 98.846  | 0.883 |
| BF211_24MHP-24J_13.1 | 76.275 | 21.624 | 2.292 | 0     | 0     | 0     | 0     | 0     | 100.191 | 0.903 |
| BF288_23DHT-24J_1.1  | 76.501 | 21.558 | 2.457 | 0     | 0     | 0     | 0     | 0     | 100.516 | 0.897 |
| BF288_23DHT-24J_2.1  | 75.313 | 21.263 | 2.562 | 0.018 | 0     | 0     | 0     | 0     | 99.156  | 0.891 |
| BF288_23DHT-24J_3.1  | 75.639 | 21.663 | 2.301 | 0.046 | 0     | 0.087 | 0     | 0     | 99.736  | 0.903 |

|                          |        |        |        |       |       |        |       |       |         |       |
|--------------------------|--------|--------|--------|-------|-------|--------|-------|-------|---------|-------|
| BF288_23DHT-24J_4.1      | 75.814 | 21.502 | 2.736  | 0     | 0     | 0      | 0     | 0     | 100.052 | 0.886 |
| BF288_23DHT-24J_4.2      | 76.282 | 21.053 | 2.844  | 0     | 0     | 0      | 0     | 0     | 100.179 | 0.880 |
| BF288_23DHT-24J_5.1      | 75.884 | 21.506 | 2.54   | 0     | 0.017 | 0.072  | 0.005 | 0     | 100.024 | 0.893 |
| BF288_23DHT-24J_5.2      | 75.566 | 21.26  | 2.4    | 0     | 0.052 | 0      | 0     | 0.026 | 99.304  | 0.897 |
| BF288_23DHT-24J_6.1      | 74.99  | 21.125 | 2.655  | 0.014 | 0.009 | 0      | 0     | 0.001 | 98.794  | 0.887 |
| 23DHT24J (average, n=24) | 75.87  | 21.28  | 2.65   |       |       | 0.03   |       |       |         | 0.89  |
| %RSD                     | 0.52   | 1.49   | 11.86  |       |       | 185.87 |       |       |         | 1.47  |
| BF184_24MHP212A1_1.1     | 75.753 | 5.129  | 19.209 | 0     | 0     | 0.24   | 0     | 0     | 100.331 | 0.209 |
| BF184_24MHP212A1_1.2     | 76.101 | 5.277  | 19.177 | 0     | 0     | 0.157  | 0     | 0     | 100.712 | 0.214 |
| BF184_24MHP212A1_1.3     | 75.281 | 5.279  | 19.012 | 0     | 0     | 0.27   | 0.003 | 0     | 99.845  | 0.215 |
| BF184_24MHP212A1_2.1     | 75.214 | 5.142  | 19.127 | 0.009 | 0     | 0.317  | 0     | 0     | 99.809  | 0.210 |
| BF184_24MHP212A1_2.2     | 75.384 | 5.085  | 18.791 | 0     | 0.036 | 0.284  | 0     | 0     | 99.58   | 0.211 |
| BF184_24MHP212A1_2.3     | 74.658 | 5.07   | 19.381 | 0     | 0.001 | 0.323  | 0.003 | 0     | 99.436  | 0.205 |
| BF184_24MHP212A1_3.1     | 75.607 | 6.791  | 17.438 | 0     | 0     | 0.375  | 0.023 | 0     | 100.234 | 0.278 |
| BF184_24MHP212A1_3.2     | 75.383 | 6.105  | 18.147 | 0     | 0     | 0.368  | 0.013 | 0     | 100.016 | 0.249 |
| BF184_24MHP212A1_4.1     | 74.895 | 5.114  | 19.032 | 0     | 0     | 0.389  | 0     | 0     | 99.43   | 0.210 |
| BF184_24MHP212A1_4.2     | 75.422 | 5.269  | 19.095 | 0     | 0     | 0.422  | 0     | 0     | 100.208 | 0.214 |
| BF184_24MHP212A1_5.1     | 74.924 | 5.713  | 18.489 | 0     | 0.028 | 0.396  | 0     | 0     | 99.55   | 0.234 |
| BF184_24MHP212A1_5.2     | 75.436 | 5.748  | 18.644 | 0     | 0     | 0.422  | 0.026 | 0     | 100.276 | 0.233 |
| BF184_24MHP212A1_6.1     | 75.317 | 6.576  | 17.785 | 0     | 0     | 0.273  | 0.001 | 0     | 99.952  | 0.267 |
| BF184_24MHP212A1_6.2     | 75.508 | 5.866  | 18.294 | 0     | 0     | 0.248  | 0     | 0     | 99.916  | 0.240 |
| BF210_24MHP212A_1.1      | 75.827 | 5.226  | 19.165 | 0     | 0.023 | 0.323  | 0     | 0     | 100.564 | 0.212 |
| BF210_24MHP212A_2.1      | 75.564 | 4.75   | 19.684 | 0     | 0     | 0.173  | 0     | 0     | 100.171 | 0.192 |
| BF210_24MHP212A_2.2      | 75.687 | 4.707  | 19.84  | 0     | 0.034 | 0.19   | 0     | 0     | 100.458 | 0.190 |
| BF210_24MHP212A_3.1      | 75.842 | 5.984  | 18.384 | 0     | 0     | 0.352  | 0     | 0     | 100.562 | 0.243 |
| BF210_24MHP212A_4.1      | 75.516 | 5.597  | 18.474 | 0     | 0.001 | 0.374  | 0.01  | 0     | 99.972  | 0.230 |
| BF210_24MHP212A_5.1      | 75.817 | 5.763  | 18.585 | 0     | 0.029 | 0.28   | 0     | 0     | 100.474 | 0.234 |
| BF210_24MHP212A_5.2      | 75.485 | 5.739  | 18.542 | 0     | 0.025 | 0.273  | 0     | 0     | 100.064 | 0.234 |
| BF210_24MHP212A_6.1      | 75.784 | 4.882  | 19.586 | 0     | 0.055 | 0.302  | 0     | 0     | 100.609 | 0.198 |
| BF210_24MHP212A_7.1      | 75.769 | 5.027  | 19.529 | 0     | 0     | 0.312  | 0     | 0     | 100.637 | 0.203 |
| BF210_24MHP212A_7.2      | 75.837 | 4.585  | 19.54  | 0     | 0     | 0.331  | 0     | 0     | 100.293 | 0.188 |
| BF210_24MHP212A_8.1      | 75.878 | 6.04   | 18.421 | 0     | 0     | 0.155  | 0.005 | 0.002 | 100.501 | 0.245 |
| BF210_24MHP212A_8.2      | 74.843 | 6.119  | 17.815 | 0     | 0     | 0.212  | 0     | 0     | 98.989  | 0.253 |
| BF210_24MHP212A_9.1      | 75.414 | 6.023  | 18.519 | 0     | 0.004 | 0.19   | 0.012 | 0     | 100.162 | 0.243 |

Table S1

|                      |        |       |        |       |       |       |       |       |         |       |
|----------------------|--------|-------|--------|-------|-------|-------|-------|-------|---------|-------|
| BF210_24MHP212A_9.2  | 75.763 | 5.482 | 18.931 | 0     | 0     | 0.248 | 0     | 0     | 100.424 | 0.222 |
| BF210_24MHP212A_9.3  | 75.498 | 6.275 | 17.98  | 0     | 0     | 0.284 | 0     | 0.014 | 100.051 | 0.256 |
| BF210_24MHP212B_1.1  | 75.353 | 5.326 | 18.907 | 0     | 0.046 | 0.417 | 0     | 0     | 100.049 | 0.218 |
| BF210_24MHP212B_1.2  | 75.806 | 5.06  | 19.359 | 0     | 0     | 0.446 | 0.003 | 0.011 | 100.685 | 0.205 |
| BF210_24MHP212B_2.1  | 75.391 | 5.306 | 19.059 | 0     | 0.002 | 0.169 | 0     | 0     | 99.927  | 0.216 |
| BF210_24MHP212B_2.2  | 74.729 | 5.185 | 19.1   | 0     | 0     | 0.374 | 0.006 | 0     | 99.394  | 0.211 |
| BF210_24MHP212B_3.1  | 76.025 | 5.697 | 18.646 | 0     | 0.004 | 0.334 | 0     | 0     | 100.706 | 0.232 |
| BF210_24MHP212B_4.1  | 75.407 | 5.233 | 18.991 | 0     | 0.019 | 0.291 | 0     | 0     | 99.941  | 0.214 |
| BF210_24MHP212B_4.2  | 75.699 | 5.205 | 19.131 | 0     | 0.027 | 0.273 | 0     | 0     | 100.335 | 0.212 |
| BF210_24MHP212B_5.1  | 76.185 | 9.662 | 14.468 | 0     | 0.001 | 0.382 | 0     | 0     | 100.698 | 0.397 |
| BF210_24MHP212B_6.1  | 75.124 | 5.806 | 18.726 | 0     | 0     | 0.251 | 0     | 0     | 99.907  | 0.234 |
| BF210_24MHP212B_7.1  | 75.554 | 5.437 | 18.812 | 0     | 0.008 | 0.241 | 0.007 | 0     | 100.059 | 0.222 |
| BF210_24MHP212B_8.1  | 76.162 | 5.346 | 19.032 | 0     | 0     | 0.216 | 0     | 0     | 100.756 | 0.217 |
| BF210_24MHP212B_9.1  | 75.727 | 5.529 | 18.99  | 0     | 0     | 0.338 | 0     | 0     | 100.584 | 0.223 |
| BF210_24MHP212B_10.1 | 75.967 | 5.18  | 19.652 | 0     | 0.023 | 0.398 | 0.013 | 0     | 101.233 | 0.207 |
| BF210_24MHP212B_11.1 | 75.516 | 5.748 | 18.617 | 0     | 0     | 0.323 | 0     | 0     | 100.204 | 0.234 |
| BF210_24MHP212B_12.1 | 75.725 | 6.364 | 17.875 | 0     | 0.032 | 0.345 | 0     | 0     | 100.341 | 0.260 |
| BF211_24MHP212BX_1.1 | 75.66  | 4.698 | 19.847 | 0     | 0     | 0.287 | 0     | 0     | 100.492 | 0.189 |
| BF211_24MHP212BX_1.2 | 75.341 | 5.21  | 19.322 | 0     | 0     | 0.222 | 0     | 0     | 100.095 | 0.210 |
| BF211_24MHP212BX_2.1 | 76.097 | 5.693 | 18.382 | 0     | 0.019 | 0.422 | 0     | 0     | 100.613 | 0.234 |
| BF211_24MHP212BX_3.1 | 75.846 | 5.711 | 18.822 | 0     | 0     | 0.276 | 0     | 0     | 100.655 | 0.231 |
| BF211_24MHP212BX_3.2 | 75.749 | 4.665 | 20.076 | 0     | 0     | 0.243 | 0     | 0     | 100.733 | 0.187 |
| BF211_24MHP212BX_4.1 | 75.722 | 5.938 | 18.619 | 0     | 0.04  | 0.247 | 0     | 0     | 100.566 | 0.239 |
| BF211_24MHP212BX_4.2 | 74.972 | 5.777 | 18.74  | 0     | 0     | 0.349 | 0     | 0     | 99.838  | 0.233 |
| BF211_24MHP212BX_5.1 | 76.055 | 5.329 | 19.061 | 0     | 0     | 0.498 | 0.003 | 0     | 100.946 | 0.216 |
| BF211_24MHP212BX_6.1 | 75.686 | 5.92  | 18.566 | 0     | 0     | 0.294 | 0     | 0     | 100.466 | 0.239 |
| BF211_24MHP212BX_6.2 | 76.16  | 5.375 | 19.059 | 0.002 | 0.018 | 0.298 | 0     | 0.033 | 100.945 | 0.218 |
| BF211_24MHP212CA_1.1 | 75.626 | 4.737 | 19.733 | 0     | 0     | 0.272 | 0     | 0     | 100.368 | 0.192 |
| BF211_24MHP212CA_2.1 | 75.983 | 5.143 | 19.418 | 0     | 0.034 | 0.305 | 0     | 0     | 100.883 | 0.207 |
| BF211_24MHP212CA_3.1 | 75.575 | 5.034 | 19.445 | 0     | 0     | 0.24  | 0     | 0     | 100.294 | 0.204 |
| BF211_24MHP212CA_3.2 | 75.171 | 5.122 | 19.205 | 0     | 0     | 0.262 | 0.032 | 0     | 99.792  | 0.208 |
| BF211_24MHP212CA_4.1 | 75.736 | 5.096 | 19.536 | 0     | 0     | 0.312 | 0     | 0     | 100.68  | 0.205 |
| BF211_24MHP212CA_4.2 | 76.025 | 5.152 | 19.431 | 0     | 0.073 | 0.367 | 0.012 | 0     | 101.06  | 0.207 |
| BF211_24MHP212CA_5.1 | 75.541 | 9.194 | 15.132 | 0     | 0     | 0.27  | 0     | 0     | 100.137 | 0.375 |
| BF211_24MHP212CA_5.2 | 75.653 | 9.548 | 14.586 | 0     | 0     | 0.405 | 0.012 | 0     | 100.204 | 0.393 |

Table S1

|                                  |                   |                   |                   |              |              |                  |              |              |                   |                         |
|----------------------------------|-------------------|-------------------|-------------------|--------------|--------------|------------------|--------------|--------------|-------------------|-------------------------|
| BF211_24MHP212CA_6.1             | 75.76             | 5.391             | 18.882            | 0            | 0.015        | 0.291            | 0            | 0            | 100.339           | 0.220                   |
| BF211_24MHP212CA_6.2             | 75.535            | 5.365             | 19.102            | 0            | 0            | 0.483            | 0.018        | 0            | 100.503           | 0.217                   |
| BF288_24MHP212BX_2.1             | 75.113            | 5.696             | 18.782            | 0            | 0            | 0.425            | 0            | 0            | 100.016           | 0.230                   |
| BF288_24MHP212BX_3.1             | 74.572            | 4.585             | 19.519            | 0            | 0            | 0.261            | 0            | 0            | 98.937            | 0.188                   |
| BF288_24MHP212BX_4.1             | 75.866            | 5.211             | 19.101            | 0            | 0            | 0.468            | 0.036        | 0            | 100.682           | 0.212                   |
| BF288_24MHP212BX_5.1             | 75.54             | 5.641             | 19.045            | 0            | 0            | 0.272            | 0            | 0            | 100.498           | 0.226                   |
| BF288_24MHP212BX_6.1             | 75.385            | 4.699             | 19.641            | 0            | 0            | 0.425            | 0.009        | 0            | 100.159           | 0.191                   |
| BF288_24MHP212BX_7.1             | 75.483            | 5.719             | 18.544            | 0            | 0            | 0.39             | 0            | 0            | 100.136           | 0.233                   |
| BF288_24MHP212BX_8.1             | 75.113            | 5.45              | 19.078            | 0            | 0.007        | 0.414            | 0.03         | 0            | 100.092           | 0.220                   |
| BF288_24MHP212BX_9.1             | 75.418            | 5.653             | 18.447            | 0            | 0.021        | 0.308            | 0.001        | 0            | 99.848            | 0.232                   |
| BF288_24MHP212BX_10.1            | 75.131            | 5.438             | 18.625            | 0            | 0.044        | 0.297            | 0            | 0            | 99.535            | 0.224                   |
| <del>BF288_24MHP212BX_11.1</del> | <del>75.296</del> | <del>11.007</del> | <del>12.993</del> | <del>0</del> | <del>0</del> | <del>0.463</del> | <del>0</del> | <del>0</del> | <del>99.759</del> | 0.455 outlier; rejected |
| BF288_24MHP212BX_12.1            | 75.166            | 5.026             | 18.994            | 0            | 0            | 0.486            | 0            | 0            | 99.672            | 0.207                   |
| of 75)                           | 75.55             | 5.59              | 18.77             |              |              | 0.32             |              |              |                   | 0.227                   |
| %RSD                             | 0.48              | 16.57             | 5.25              |              |              | 25.86            |              |              |                   | 16.91                   |
| BF184_WHF1_1.1                   | 74.69             | 0.424             | 23.786            | 0.272        | 0.013        | 0.152            | 0            | 0            | 99.337            | 0.017                   |
| BF184_WHF1_1.2                   | 75.974            | 0.536             | 23.479            | 0.062        | 0            | 0.055            | 0            | 0            | 100.106           | 0.022                   |
| BF184_WHF1_2.1                   | 75.787            | 0.421             | 23.874            | 0            | 0            | 0.218            | 0            | 0            | 100.3             | 0.017                   |
| BF184_WHF1_2.2                   | 76.655            | 1.336             | 23.128            | 0            | 0            | 0.258            | 0.044        | 0            | 101.421           | 0.054                   |
| BF184_WHF1_2.3                   | 75.452            | 0.808             | 22.896            | 0            | 0            | 0.036            | 0            | 0            | 99.192            | 0.034                   |
| BF184_WHF1_3.1                   | 75.154            | 0.671             | 23.196            | 0            | 0.022        | 0.218            | 0            | 0.011        | 99.272            | 0.028                   |
| BF184_WHF1_4.1                   | 76.136            | 0.132             | 24.067            | 0            | 0.042        | 0.145            | 0            | 0            | 100.522           | 0.005                   |
| BF184_WHF1_5.2                   | 75.259            | 3.149             | 21.08             | 0.091        | 0.039        | 0.24             | 0            | 0            | 99.858            | 0.129                   |
| BF184_WHF1_5.3                   | 75.251            | 0.173             | 24.256            | 0.07         | 0            | 0.25             | 0            | 0            | 100               | 0.007                   |
| BF184_WHF1_6.1                   | 75.445            | 3.51              | 20.729            | 0.046        | 0.006        | 0.146            | 0            | 0            | 99.882            | 0.143                   |
| BF184_WHF1_6.2                   | 75.295            | 3.417             | 20.735            | 0.051        | 0            | 0.131            | 0            | 0            | 99.629            | 0.140                   |
| BF184_WHF1_7.1                   | 75.358            | 0.084             | 24.193            | 0            | 0            | 0.145            | 0            | 0.009        | 99.789            | 0.003                   |
| BF184_WHF1_8.1                   | 75.049            | 0.09              | 24.21             | 0.17         | 0.012        | 0.149            | 0            | 0            | 99.68             | 0.004                   |
| BF184_WHF1_8.2                   | 75.405            | 0.036             | 24.11             | 0.138        | 0.01         | 0.109            | 0            | 0            | 99.808            | 0.001                   |
| WHF1 (average, n=14)             | 75.49             | 1.06              | 23.12             |              |              | 0.16             |              |              |                   | 0.043                   |
| %RSD                             | 0.66              | 122.86            | 5.66              |              |              | 42.76            |              |              |                   | 122.75                  |
| BF184_WHF11_1.1                  | 75.603            | 18.186            | 6.222             | 0            | 0            | 0                | 0            | 0            | 100.011           | 0.743                   |

|                       |        |        |        |       |       |        |       |       |         |       |
|-----------------------|--------|--------|--------|-------|-------|--------|-------|-------|---------|-------|
| BF184_WHF11_2.1       | 75.528 | 16.456 | 7.893  | 0     | 0     | 0.029  | 0     | 0     | 99.906  | 0.673 |
| BF184_WHF11_2.2       | 76.846 | 16.008 | 7.812  | 0     | 0.024 | 0      | 0.014 | 0     | 100.704 | 0.669 |
| BF184_WHF11_3.1       | 76.193 | 16.19  | 7.943  | 0     | 0     | 0      | 0     | 0     | 100.326 | 0.668 |
| BF184_WHF11_3.2       | 75.564 | 16.249 | 8.009  | 0     | 0     | 0.026  | 0     | 0     | 99.848  | 0.667 |
| BF184_WHF11_4.1       | 75.356 | 16.119 | 8.318  | 0     | 0     | 0.059  | 0.04  | 0     | 99.892  | 0.657 |
| BF184_WHF11_4.2       | 75.671 | 16.577 | 7.639  | 0     | 0.008 | 0.172  | 0     | 0.005 | 100.072 | 0.682 |
| BF184_WHF11_5.1       | 75.598 | 15.556 | 8.54   | 0     | 0     | 0.051  | 0     | 0     | 99.745  | 0.643 |
| BF184_WHF11_5.2       | 75.618 | 15.764 | 8.386  | 0     | 0.032 | 0.084  | 0.028 | 0     | 99.912  | 0.650 |
| BF184_WHF11_6.1       | 74.3   | 15.144 | 9.364  | 0     | 0.036 | 0.066  | 0.008 | 0.005 | 98.923  | 0.615 |
| BF184_WHF11_6.2       | 75.677 | 16.83  | 7.412  | 0     | 0.011 | 0      | 0.001 | 0     | 99.931  | 0.692 |
| BF184_WHF11_7.1       | 75.304 | 15.649 | 8.5    | 0     | 0     | 0      | 0.021 | 0     | 99.474  | 0.645 |
| BF184_WHF11_7.2       | 76.02  | 16.241 | 7.87   | 0     | 0.001 | 0.062  | 0.02  | 0     | 100.214 | 0.671 |
| BF184_WHF11_8.1       | 76.299 | 15.696 | 8.128  | 0     | 0.032 | 0.048  | 0     | 0     | 100.203 | 0.656 |
| WHF11 (average, n=14) | 75.68  | 16.19  | 8.00   |       |       | 0.04   |       |       |         | 0.67  |
| %RSD                  | 0.76   | 4.49   | 8.75   |       |       | 111.30 |       |       |         | 4.35  |
| BF184_WHF12_1.1       | 75.492 | 16.5   | 7.732  | 0     | 0     | 0.084  | 0     | 0.017 | 99.825  | 0.678 |
| BF184_WHF12_1.2       | 75.529 | 16.725 | 7.822  | 0     | 0.023 | 0.044  | 0     | 0     | 100.143 | 0.679 |
| BF184_WHF12_2.1       | 75.45  | 15.633 | 8.81   | 0     | 0.03  | 0.048  | 0     | 0     | 99.971  | 0.637 |
| BF184_WHF12_2.2       | 75.017 | 15.344 | 8.556  | 0     | 0     | 0.077  | 0.032 | 0     | 99.026  | 0.639 |
| BF184_WHF12_3.1       | 75.697 | 16.431 | 7.695  | 0     | 0     | 0.066  | 0     | 0.013 | 99.902  | 0.678 |
| BF184_WHF12_3.2       | 75.89  | 16.533 | 7.745  | 0     | 0     | 0.081  | 0     | 0.009 | 100.258 | 0.678 |
| BF184_WHF12_4.1       | 75.913 | 16.877 | 7.189  | 0     | 0.044 | 0.07   | 0     | 0     | 100.093 | 0.699 |
| BF184_WHF12_4.2       | 75.526 | 16.433 | 7.863  | 0.031 | 0.059 | 0      | 0     | 0.009 | 99.921  | 0.674 |
| BF184_WHF12_5.1       | 75.617 | 16.521 | 7.712  | 0     | 0.038 | 0.102  | 0.013 | 0.007 | 100.01  | 0.679 |
| BF184_WHF12_5.2       | 75.715 | 16.456 | 7.889  | 0     | 0     | 0.099  | 0     | 0     | 100.159 | 0.673 |
| BF184_WHF12_6.1       | 75.847 | 16.253 | 8.026  | 0     | 0     | 0      | 0     | 0     | 100.126 | 0.667 |
| BF184_WHF12_6.3       | 76.92  | 16.28  | 7.516  | 0     | 0     | 0      | 0     | 0     | 100.716 | 0.681 |
| BF184_WHF12_7.1       | 75.383 | 16.552 | 7.699  | 0     | 0.013 | 0      | 0     | 0.003 | 99.65   | 0.680 |
| WHF12 (average, n=13) | 75.69  | 16.35  | 7.87   |       |       | 0.05   |       |       |         | 0.67  |
| %RSD                  | 0.58   | 2.56   | 5.31   |       |       | 76.30  |       |       |         | 2.51  |
| BF184_WHF2_1.1        | 75.478 | 0.069  | 24.474 | 0     | 0.078 | 0.257  | 0     | 0     | 100.356 | 0.003 |
| BF184_WHF2_1.2        | 75.592 | 0.018  | 24.193 | 0     | 0     | 0.145  | 0     | 0     | 99.948  | 0.001 |

Table S1

|                      |        |        |        |       |       |       |       |       |         |       |
|----------------------|--------|--------|--------|-------|-------|-------|-------|-------|---------|-------|
| BF184_WHF2_1.3       | 75.524 | 0.05   | 24.36  | 0     | 0     | 0.265 | 0     | 0     | 100.199 | 0.002 |
| BF184_WHF2_2.1       | 75.625 | 0.045  | 24.27  | 0.073 | 0.013 | 0.301 | 0     | 0     | 100.327 | 0.002 |
| BF184_WHF2_2.2       | 75.441 | 0.054  | 24.096 | 0     | 0     | 0.229 | 0.022 | 0     | 99.842  | 0.002 |
| BF184_WHF2_2.3       | 75.34  | 0.067  | 24.366 | 0.122 | 0.037 | 0.149 | 0     | 0     | 100.081 | 0.003 |
| BF184_WHF2_3.1       | 75.056 | 0.026  | 24.12  | 0.08  | 0.026 | 0.218 | 0     | 0     | 99.526  | 0.001 |
| BF184_WHF2_3.2       | 75.86  | 0.017  | 24.396 | 0.039 | 0     | 0.301 | 0     | 0     | 100.613 | 0.001 |
| BF184_WHF2_3.3       | 75.471 | 0.051  | 24.361 | 0     | 0.046 | 0.496 | 0     | 0.002 | 100.427 | 0.002 |
| BF184_WHF2_4.1       | 75.385 | 0.04   | 24.189 | 0     | 0     | 0.319 | 0     | 0     | 99.933  | 0.002 |
| BF184_WHF2_4.2       | 75.782 | 0.049  | 24.252 | 0     | 0     | 0.145 | 0.01  | 0     | 100.238 | 0.002 |
| BF184_WHF2_5.1       | 74.138 | 0.048  | 24.184 | 0.002 | 0     | 0.21  | 0.013 | 0     | 98.595  | 0.002 |
| BF184_WHF2_5.2       | 76.043 | 0.062  | 24.262 | 0.032 | 0.056 | 0.102 | 0     | 0.018 | 100.575 | 0.003 |
| BF184_WHF2_6.1       | 75.102 | 0.042  | 23.545 | 0     | 0     | 0.414 | 0.022 | 0     | 99.125  | 0.002 |
| BF184_WHF2_6.2       | 75.002 | 0.045  | 23.615 | 0.142 | 0     | 0.2   | 0     | 0     | 99.004  | 0.002 |
| WHF2 (average, n=15) | 75.39  | 0.05   | 24.18  |       |       | 0.25  |       |       |         | 0.002 |
| %RSD                 | 0.60   | 34.32  | 1.10   |       |       | 42.40 |       |       |         | 33.93 |
| BF184_WHF3_1.1       | 75.866 | 20.559 | 3.572  | 0     | 0     | 0.169 | 0.014 | 0     | 100.18  | 0.850 |
| BF184_WHF3_1.2       | 75.661 | 19.431 | 4.7    | 0     | 0     | 0.125 | 0     | 0     | 99.917  | 0.803 |
| BF184_WHF3_2.1       | 75.555 | 21.853 | 2.648  | 0     | 0.05  | 0.062 | 0     | 0     | 100.168 | 0.891 |
| BF184_WHF3_3.1       | 75.717 | 19.535 | 4.985  | 0     | 0     | 0.183 | 0     | 0     | 100.42  | 0.795 |
| BF184_WHF3_3.2       | 75.488 | 20.813 | 3.383  | 0     | 0     | 0.257 | 0     | 0     | 99.941  | 0.859 |
| BF184_WHF3_3.3       | 75.577 | 19.391 | 5.017  | 0     | 0.015 | 0.15  | 0     | 0     | 100.15  | 0.792 |
| BF184_WHF3_4.1       | 75.309 | 19.566 | 4.66   | 0     | 0     | 0.231 | 0     | 0     | 99.766  | 0.806 |
| BF184_WHF3_4.2       | 75.248 | 20.401 | 3.687  | 0     | 0.014 | 0.173 | 0.031 | 0     | 99.554  | 0.845 |
| BF184_WHF3_5.1       | 75.306 | 20.539 | 3.706  | 0     | 0     | 0.184 | 0.009 | 0     | 99.744  | 0.845 |
| BF184_WHF3_5.2       | 75.47  | 20.401 | 4.057  | 0     | 0.086 | 0.191 | 0     | 0     | 100.205 | 0.832 |
| BF184_WHF3_6.1       | 74.997 | 20.83  | 3.347  | 0     | 0     | 0.301 | 0     | 0     | 99.475  | 0.860 |
| BF184_WHF3_7.1       | 75.289 | 20.02  | 4.231  | 0     | 0.016 | 0.132 | 0     | 0     | 99.688  | 0.824 |
| WHF3 (average, n=12) | 75.46  | 20.28  | 4.00   |       |       | 0.18  |       |       |         | 0.83  |
| %RSD                 | 0.32   | 3.61   | 18.45  |       |       | 35.02 |       |       |         | 3.65  |
| BF210_24MHP409A_1.1  | 75.609 | 12.988 | 11.068 | 0.012 | 0.042 | 0.144 | 0     | 0     | 99.863  | 0.537 |
| BF210_24MHP409A_1.2  | 75.953 | 11.449 | 12.611 | 0.02  | 0.067 | 0.104 | 0     | 0.004 | 100.208 | 0.473 |
| BF210_24MHP409A_2.1  | 75.875 | 10.706 | 13.663 | 0     | 0     | 0.007 | 0     | 0     | 100.251 | 0.436 |

Table S1

|                      |        |        |        |       |       |       |       |       |         |       |
|----------------------|--------|--------|--------|-------|-------|-------|-------|-------|---------|-------|
| BF210_24MHP409A_2.2  | 76.112 | 11.329 | 12.663 | 0     | 0.012 | 0.137 | 0.025 | 0     | 100.278 | 0.469 |
| BF210_24MHP409A_3.1  | 75.585 | 10.726 | 13.332 | 0     | 0.026 | 0.101 | 0     | 0     | 99.77   | 0.443 |
| BF210_24MHP409A_4.1  | 76.068 | 10.901 | 13.105 | 0     | 0     | 0.108 | 0     | 0     | 100.182 | 0.451 |
| BF210_24MHP409A_4.2  | 76.505 | 11.629 | 12.541 | 0     | 0     | 0     | 0     | 0     | 100.675 | 0.478 |
| BF210_24MHP409A_5.1  | 75.823 | 11.921 | 12.033 | 0.013 | 0.061 | 0.169 | 0     | 0     | 100.02  | 0.494 |
| BF210_24MHP409A_5.2  | 75.771 | 11.51  | 12.287 | 0.041 | 0.004 | 0.076 | 0.015 | 0     | 99.704  | 0.481 |
| BF210_24MHP409A_6.1  | 75.496 | 10.462 | 13.442 | 0     | 0.039 | 0.144 | 0     | 0     | 99.583  | 0.435 |
| BF210_24MHP409A_6.2  | 75.741 | 11.008 | 12.954 | 0.056 | 0.016 | 0.09  | 0     | 0     | 99.865  | 0.456 |
| BF210_24MHP409A_7.1  | 75.94  | 8.132  | 16.089 | 0     | 0     | 0.083 | 0     | 0     | 100.244 | 0.333 |
| BF210_24MHP409A_7.2  | 75.169 | 9.651  | 14.367 | 0     | 0.002 | 0.208 | 0.011 | 0.031 | 99.439  | 0.399 |
| BF210_24MHP409A_8.1  | 75.74  | 11.4   | 12.69  | 0     | 0.038 | 0.025 | 0     | 0     | 99.893  | 0.470 |
| BF210_24MHP409A_8.2  | 75.879 | 11.947 | 12.301 | 0     | 0     | 0.072 | 0     | 0     | 100.199 | 0.490 |
| BF210_24MHP409B_1.1  | 76.102 | 14.988 | 8.861  | 0     | 0.046 | 0.065 | 0     | 0     | 100.062 | 0.625 |
| BF210_24MHP409B_2.1  | 75.683 | 13.888 | 9.924  | 0     | 0.053 | 0.058 | 0.025 | 0     | 99.631  | 0.580 |
| BF210_24MHP409B_3.1  | 75.04  | 11.756 | 12.243 | 0     | 0     | 0     | 0.019 | 0     | 99.058  | 0.487 |
| BF210_24MHP409B_3.2  | 75.436 | 12.535 | 11.747 | 0     | 0     | 0     | 0     | 0.002 | 99.72   | 0.513 |
| BF210_24MHP409B_4.1  | 76.366 | 10.734 | 13.442 | 0     | 0     | 0.065 | 0     | 0     | 100.607 | 0.441 |
| BF210_24MHP409B_4.2  | 75.71  | 10.131 | 14.127 | 0     | 0.01  | 0.086 | 0     | 0     | 100.064 | 0.415 |
| BF210_24MHP409B_5.1  | 76.163 | 11.302 | 13.094 | 0     | 0.016 | 0.094 | 0.022 | 0     | 100.691 | 0.460 |
| BF210_24MHP409B_6.1  | 76.197 | 14.74  | 9.28   | 0     | 0.047 | 0.043 | 0.004 | 0     | 100.311 | 0.611 |
| BF210_24MHP409B_7.1  | 76.017 | 14.64  | 9.546  | 0     | 0     | 0     | 0     | 0     | 100.203 | 0.602 |
| BF210_24MHP409B_8.1  | 76.177 | 14.016 | 9.939  | 0     | 0.017 | 0.08  | 0     | 0     | 100.229 | 0.582 |
| BF210_24MHP409B_9.1  | 76.551 | 14.142 | 9.939  | 0     | 0.012 | 0.007 | 0.038 | 0     | 100.689 | 0.584 |
| BF210_24MHP409B_9.2  | 76.141 | 12.596 | 11.367 | 0     | 0.002 | 0.094 | 0     | 0     | 100.2   | 0.522 |
| BF210_24MHP409B_10.1 | 76.091 | 13.703 | 10.398 | 0     | 0.05  | 0.08  | 0     | 0.045 | 100.367 | 0.565 |
| BF210_24MHP409B_11.1 | 76.174 | 13.492 | 10.75  | 0     | 0     | 0.04  | 0     | 0     | 100.456 | 0.553 |
| BF210_24MHP409B_11.2 | 76.04  | 11.79  | 12.423 | 0     | 0.007 | 0.029 | 0     | 0     | 100.289 | 0.484 |
| BF211_24MHP409A_1.1  | 75.794 | 11.477 | 12.788 | 0     | 0     | 0     | 0     | 0     | 100.059 | 0.470 |
| BF211_24MHP409A_1.2  | 76.153 | 11.366 | 13.094 | 0     | 0     | 0.106 | 0     | 0     | 100.719 | 0.462 |
| BF211_24MHP409A_2.1  | 75.75  | 11.022 | 13.046 | 0.009 | 0     | 0.018 | 0     | 0     | 99.845  | 0.455 |
| BF211_24MHP409A_2.2  | 75.862 | 10.656 | 13.734 | 0.021 | 0     | 0     | 0.022 | 0.018 | 100.313 | 0.434 |
| BF211_24MHP409A_3.1  | 76.136 | 11.711 | 12.273 | 0     | 0     | 0.033 | 0     | 0     | 100.153 | 0.485 |
| BF211_24MHP409A_3.2  | 76.002 | 11.871 | 12.451 | 0     | 0     | 0.011 | 0     | 0     | 100.335 | 0.485 |
| BF211_24MHP409A_4.1  | 75.795 | 13.421 | 10.288 | 0     | 0.054 | 0.095 | 0     | 0     | 99.653  | 0.563 |
| BF211_24MHP409A_4.2  | 76.02  | 15.317 | 8.522  | 0     | 0     | 0     | 0     | 0     | 99.859  | 0.640 |

|                          |        |        |        |       |       |       |       |       |         |       |
|--------------------------|--------|--------|--------|-------|-------|-------|-------|-------|---------|-------|
| BF211_24MHP409A_5.1      | 75.953 | 12.434 | 11.654 | 0     | 0.06  | 0.022 | 0.005 | 0     | 100.128 | 0.513 |
| BF211_24MHP409A_5.2      | 75.485 | 10.05  | 13.962 | 0     | 0.014 | 0.007 | 0     | 0.019 | 99.537  | 0.415 |
| BF211_24MHP409B_1.1      | 76.396 | 11.834 | 12.454 | 0.002 | 0     | 0     | 0     | 0     | 100.686 | 0.484 |
| BF211_24MHP409B_1.2      | 76.136 | 11.327 | 13.092 | 0     | 0     | 0.139 | 0     | 0     | 100.694 | 0.461 |
| BF211_24MHP409B_2.1      | 75.619 | 11.748 | 12.589 | 0     | 0     | 0.015 | 0     | 0     | 99.971  | 0.480 |
| BF211_24MHP409B_3.1      | 76.182 | 12.884 | 11.314 | 0     | 0     | 0.055 | 0     | 0     | 100.435 | 0.529 |
| BF211_24MHP409B_4.1      | 76.167 | 12.283 | 11.431 | 0     | 0     | 0.062 | 0     | 0     | 99.943  | 0.515 |
| BF211_24MHP409B_4.2      | 76.346 | 12.763 | 11.35  | 0     | 0     | 0.091 | 0     | 0.019 | 100.569 | 0.526 |
| BF211_24MHP409B_5.1      | 74.727 | 11.789 | 12.455 | 0     | 0.011 | 0     | 0.003 | 0.016 | 99.001  | 0.483 |
| BF211_24MHP409B_6.1      | 76.412 | 14.457 | 9.478  | 0     | 0     | 0     | 0     | 0     | 100.347 | 0.601 |
| BF211_24MHP409B_7.1      | 75.451 | 13.601 | 10.619 | 0     | 0     | 0.015 | 0     | 0     | 99.686  | 0.558 |
| BF211_24MHP409B_8.1      | 76.444 | 13.69  | 10.42  | 0     | 0     | 0.026 | 0.009 | 0.005 | 100.594 | 0.565 |
| 24MHP409 (average, n=50) | 75.92  | 12.12  | 11.98  |       |       | 0.06  |       |       |         | 0.500 |
| %RSD                     | 0.49   | 12.43  | 13.14  |       |       | 90.26 |       |       |         | 12.80 |
| BF210_24MHP414A_1.1      | 75.638 | 13.301 | 10.639 | 0     | 0.048 | 0.072 | 0.015 | 0     | 99.713  | 0.552 |
| BF210_24MHP414A_2.1      | 75.561 | 13.929 | 9.97   | 0     | 0.011 | 0.173 | 0     | 0     | 99.644  | 0.580 |
| BF210_24MHP414A_3.1      | 74.81  | 10.841 | 13.129 | 0     | 0.025 | 0.097 | 0     | 0     | 98.902  | 0.449 |
| BF210_24MHP414A_4.1      | 75.562 | 11.332 | 12.65  | 0     | 0     | 0.079 | 0     | 0     | 99.623  | 0.469 |
| BF210_24MHP414A_5.1      | 76.187 | 9.842  | 14.339 | 0     | 0     | 0.05  | 0     | 0.011 | 100.429 | 0.404 |
| BF210_24MHP414A_6.1      | 75.054 | 9.652  | 14.569 | 0.108 | 0     | 0.047 | 0.006 | 0     | 99.436  | 0.395 |
| BF210_24MHP414A_7.1      | 75.391 | 12.11  | 11.759 | 0     | 0     | 0.007 | 0     | 0     | 99.267  | 0.504 |
| BF210_24MHP414A_7.2      | 76.12  | 12.494 | 11.594 | 0     | 0.043 | 0.119 | 0.009 | 0     | 100.379 | 0.516 |
| BF210_24MHP414A_8.1      | 75.569 | 11.916 | 11.739 | 0     | 0.013 | 0.083 | 0.029 | 0     | 99.349  | 0.501 |
| BF210_24MHP414A_8.2      | 74.904 | 12.732 | 11.316 | 0     | 0     | 0     | 0     | 0     | 98.952  | 0.526 |
| BF210_24MHP414A_9.1      | 75.844 | 8.425  | 15.638 | 0     | 0.032 | 0.158 | 0.071 | 0     | 100.168 | 0.347 |
| BF210_24MHP414A_9.2      | 75.219 | 10.473 | 12.839 | 0     | 0     | 0     | 0     | 0     | 98.531  | 0.446 |
| BF210_24MHP414A_10.1     | 76.094 | 12.75  | 11.728 | 0.022 | 0.044 | 0.097 | 0     | 0     | 100.735 | 0.518 |
| BF210_24MHP414A_10.2     | 75.435 | 12.781 | 11.202 | 0     | 0.006 | 0.054 | 0.038 | 0     | 99.516  | 0.530 |
| BF210_24MHP414A_11.1     | 75.714 | 15.21  | 8.63   | 0     | 0.049 | 0.018 | 0     | 0     | 99.621  | 0.635 |
| BF210_24MHP414A_12.1     | 75.694 | 9.446  | 14.807 | 0     | 0     | 0.147 | 0     | 0.003 | 100.097 | 0.386 |
| BF210_24MHP414A_12.2     | 75.448 | 11.588 | 12.683 | 0     | 0     | 0     | 0     | 0     | 99.719  | 0.474 |
| BF210_24MHP414A_13.1     | 76.031 | 11.701 | 12.333 | 0     | 0     | 0.054 | 0     | 0     | 100.119 | 0.484 |
| BF210_24MHP414A_13.2     | 76.235 | 11.07  | 13.042 | 0     | 0     | 0.108 | 0     | 0     | 100.455 | 0.456 |
| BF210_24MHP414A_13.3     | 75.081 | 11.263 | 12.752 | 0     | 0     | 0.054 | 0     | 0.01  | 99.16   | 0.466 |

Table S1

|                           |        |        |        |       |       |       |       |       |         |       |
|---------------------------|--------|--------|--------|-------|-------|-------|-------|-------|---------|-------|
| 24MHP414A (average, n=20) | 75.58  | 11.64  | 12.37  |       |       | 0.07  |       |       |         | 0.48  |
| %RSD                      | 0.56   | 13.99  | 13.62  |       |       | 74.47 |       |       |         | 14.27 |
| BF210_24MHP415A_1.1       | 75.161 | 11.182 | 12.719 | 0     | 0.017 | 0.133 | 0     | 0.042 | 99.254  | 0.465 |
| BF210_24MHP415A_1.2       | 75.545 | 11.857 | 12.464 | 0     | 0     | 0.004 | 0     | 0     | 99.87   | 0.484 |
| BF210_24MHP415A_2.1       | 75.512 | 13.353 | 10.56  | 0     | 0     | 0.018 | 0     | 0     | 99.443  | 0.555 |
| BF210_24MHP415A_2.2       | 75.917 | 9.139  | 14.673 | 0     | 0     | 0.147 | 0     | 0     | 99.876  | 0.381 |
| BF210_24MHP415A_3.1       | 75.807 | 12.798 | 11.337 | 0     | 0     | 0     | 0.005 | 0     | 99.947  | 0.527 |
| BF210_24MHP415A_3.2       | 74.932 | 14.009 | 9.902  | 0     | 0.031 | 0.036 | 0     | 0     | 98.91   | 0.583 |
| BF210_24MHP415A_4.1       | 75.958 | 12.858 | 11.67  | 0     | 0.091 | 0.083 | 0     | 0     | 100.66  | 0.521 |
| BF210_24MHP415A_4.2       | 75.058 | 14.516 | 9.354  | 0     | 0     | 0.188 | 0.008 | 0     | 99.124  | 0.605 |
| BF210_24MHP415A_5.1       | 76.053 | 8.968  | 15.27  | 0     | 0     | 0.227 | 0     | 0     | 100.518 | 0.367 |
| BF210_24MHP415A_5.2       | 76.328 | 13.163 | 10.778 | 0     | 0     | 0.152 | 0.013 | 0     | 100.434 | 0.547 |
| BF210_24MHP415A_6.1       | 74.998 | 13.339 | 10.703 | 0     | 0     | 0.141 | 0.016 | 0     | 99.197  | 0.552 |
| BF210_24MHP415A_6.2       | 76.21  | 13.443 | 10.453 | 0     | 0     | 0.051 | 0.001 | 0     | 100.158 | 0.559 |
| BF210_24MHP415A_7.1       | 76.077 | 9.803  | 14.347 | 0     | 0.064 | 0.083 | 0     | 0     | 100.374 | 0.403 |
| BF210_24MHP415A_7.2       | 76.392 | 9.885  | 14.595 | 0     | 0.009 | 0.148 | 0     | 0     | 101.029 | 0.401 |
| BF210_24MHP415A_8.1       | 75.959 | 14.36  | 9.683  | 0     | 0     | 0.109 | 0.002 | 0     | 100.113 | 0.594 |
| BF210_24MHP415A_8.2       | 75.934 | 13.718 | 10.349 | 0     | 0.028 | 0.087 | 0     | 0     | 100.116 | 0.567 |
| BF210_24MHP415A_9.1       | 76.513 | 7.864  | 16.388 | 0     | 0.014 | 0.068 | 0.006 | 0     | 100.853 | 0.321 |
| BF210_24MHP415A_10.1      | 76.268 | 14.127 | 10.089 | 0     | 0     | 0.076 | 0     | 0.003 | 100.563 | 0.580 |
| BF210_24MHP415A_11.1      | 76.402 | 17.225 | 6.732  | 0     | 0.043 | 0.069 | 0     | 0     | 100.471 | 0.716 |
| BF210_24MHP415A_12.1      | 75.792 | 13.312 | 10.733 | 0.006 | 0.009 | 0.076 | 0     | 0     | 99.928  | 0.550 |
| BF211_24MHP415A_2.1       | 75.923 | 8.654  | 15.391 | 0     | 0     | 0.018 | 0     | 0     | 99.986  | 0.357 |
| BF211_24MHP415A_3.1       | 76.258 | 11.502 | 12.582 | 0     | 0.041 | 0.077 | 0     | 0     | 100.46  | 0.474 |
| BF211_24MHP415A_5.1       | 75.891 | 14.365 | 9.695  | 0     | 0     | 0.088 | 0.034 | 0     | 100.073 | 0.594 |
| BF211_24MHP415A_6.1       | 75.199 | 10.983 | 13.381 | 0.07  | 0     | 0.073 | 0.004 | 0     | 99.71   | 0.448 |
| BF211_24MHP415A_6.2       | 75.632 | 12.176 | 12.181 | 0     | 0     | 0.055 | 0     | 0     | 100.044 | 0.497 |
| BF211_24MHP415A_7.1       | 75.845 | 12.644 | 11.391 | 0     | 0     | 0.194 | 0     | 0     | 100.074 | 0.523 |
| BF211_24MHP415A_8.1       | 76.075 | 10.826 | 13.42  | 0     | 0     | 0.142 | 0.034 | 0     | 100.497 | 0.443 |
| BF211_24MHP415A_9.1       | 75.849 | 17.483 | 6.718  | 0     | 0.057 | 0.146 | 0     | 0.039 | 100.292 | 0.720 |
| BF211_24MHP415A_10.1      | 75.545 | 10.707 | 13.523 | 0     | 0     | 0.011 | 0     | 0     | 99.786  | 0.439 |
| BF211_24MHP415A_10.2      | 75.907 | 11.043 | 13.288 | 0     | 0.003 | 0.153 | 0.005 | 0     | 100.399 | 0.451 |
| 24MHP415A (average, n=30) | 75.83  | 12.31  | 11.81  |       |       | 0.10  |       |       |         | 0.51  |

| %RSD                     | 0.57   | 18.78  | 20.07  |       |       | 62.71 |       |       | 19.14   |       |
|--------------------------|--------|--------|--------|-------|-------|-------|-------|-------|---------|-------|
| BF210_24MHP416_1.1       | 76.151 | 13.842 | 10.432 | 0     | 0.025 | 0.106 | 0.003 | 0     | 100.559 | 0.567 |
| BF210_24MHP416_2.1       | 76.163 | 13.429 | 10.666 | 0     | 0.007 | 0.132 | 0     | 0     | 100.397 | 0.554 |
| BF210_24MHP416_3.1       | 75.81  | 14.3   | 9.811  | 0     | 0     | 0.007 | 0     | 0     | 99.928  | 0.590 |
| BF210_24MHP416_4.1       | 75.777 | 14.302 | 9.934  | 0     | 0     | 0.102 | 0     | 0     | 100.115 | 0.587 |
| BF210_24MHP416_5.1       | 75.637 | 12.558 | 11.644 | 0     | 0     | 0.091 | 0     | 0     | 99.93   | 0.516 |
| BF210_24MHP416_6.1       | 76.021 | 12.983 | 11.265 | 0     | 0.009 | 0.109 | 0     | 0     | 100.387 | 0.532 |
| BF210_24MHP416_7.1       | 75.181 | 13.715 | 10.072 | 0     | 0     | 0.08  | 0     | 0     | 99.048  | 0.573 |
| BF210_24MHP416_8.1       | 75.723 | 12.49  | 11.706 | 0     | 0     | 0.047 | 0     | 0     | 99.966  | 0.513 |
| BF210_24MHP416_8.2       | 75.813 | 12.986 | 11.227 | 0     | 0.008 | 0.007 | 0.012 | 0     | 100.053 | 0.533 |
| BF210_24MHP416_9.1       | 75.993 | 12.497 | 11.617 | 0     | 0.004 | 0.069 | 0     | 0     | 100.18  | 0.515 |
| BF210_24MHP416_10.1      | 75.87  | 11.88  | 11.913 | 0     | 0.003 | 0.044 | 0     | 0     | 99.71   | 0.496 |
| BF210_24MHP416_11.1      | 76.02  | 12.594 | 11.504 | 0     | 0     | 0.026 | 0     | 0     | 100.144 | 0.519 |
| BF210_24MHP416_12.1      | 75.66  | 14.095 | 9.908  | 0     | 0     | 0.184 | 0.061 | 0     | 99.908  | 0.584 |
| BF210_24MHP416_13.1      | 75.598 | 13.252 | 10.555 | 0     | 0.019 | 0     | 0.001 | 0     | 99.425  | 0.554 |
| BF210_24MHP416_14.1      | 75.572 | 12.361 | 12.09  | 0     | 0.071 | 0.065 | 0     | 0     | 100.159 | 0.502 |
| BF210_24MHP416_14.2      | 75.499 | 12.427 | 11.756 | 0     | 0     | 0     | 0     | 0     | 99.682  | 0.511 |
| BF210_24MHP416_15.1      | 75.724 | 14.07  | 10.08  | 0     | 0     | 0.134 | 0     | 0     | 100.008 | 0.580 |
| BF210_24MHP416_15.2      | 76.022 | 13.764 | 10.2   | 0.011 | 0     | 0     | 0.022 | 0     | 100.019 | 0.571 |
| BF210_24MHP416_16.1      | 75.938 | 12.607 | 11.356 | 0     | 0     | 0.173 | 0     | 0     | 100.074 | 0.523 |
| BF210_24MHP416_16.2      | 75.574 | 13.425 | 10.714 | 0     | 0.031 | 0.08  | 0     | 0     | 99.824  | 0.553 |
| BF211_24MHP416_1.1       | 75.477 | 12.37  | 12.051 | 0.084 | 0.072 | 0.106 | 0     | 0     | 100.16  | 0.503 |
| BF211_24MHP416_1.2       | 75.937 | 15.041 | 9.175  | 0.001 | 0     | 0     | 0     | 0.028 | 100.182 | 0.618 |
| BF211_24MHP416_2.1       | 75.762 | 10.339 | 13.902 | 0     | 0     | 0     | 0     | 0     | 100.003 | 0.423 |
| BF211_24MHP416_3.1       | 75.697 | 12.899 | 11.252 | 0     | 0     | 0.091 | 0     | 0     | 99.939  | 0.531 |
| BF211_24MHP416_3.2       | 75.745 | 13.747 | 10.775 | 0.124 | 0     | 0.091 | 0     | 0     | 100.482 | 0.557 |
| BF211_24MHP416_4.1       | 75.343 | 8.59   | 15.288 | 0.07  | 0.044 | 0.066 | 0.039 | 0     | 99.44   | 0.357 |
| BF211_24MHP416_5.1       | 76.424 | 13.116 | 11.152 | 0     | 0     | 0.029 | 0     | 0     | 100.721 | 0.537 |
| BF211_24MHP416_6.1       | 75.719 | 13.333 | 10.788 | 0     | 0     | 0.007 | 0.032 | 0     | 99.879  | 0.550 |
| BF211_24MHP416_7.1       | 76.477 | 12.687 | 11.796 | 0.01  | 0.023 | 0.168 | 0     | 0.02  | 101.181 | 0.515 |
| BF211_24MHP416_8.1       | 75.918 | 12.323 | 12.017 | 0     | 0     | 0     | 0     | 0     | 100.258 | 0.503 |
| 24MHP416 (average, n=30) | 75.81  | 12.93  | 11.22  |       |       | 0.07  |       |       |         | 0.53  |
| %RSD                     | 0.38   | 9.44   | 10.83  |       |       | 84.69 |       |       |         | 9.48  |

Table S1

|                                          |        |        |        |   |       |       |       |       |           |       |
|------------------------------------------|--------|--------|--------|---|-------|-------|-------|-------|-----------|-------|
| BF288_24MHP225_1.1                       | 74.86  | 5.787  | 18.391 | 0 | 0     | 0.622 | 0.012 | 0     | 99.672    | 0.237 |
| BF288_24MHP225_2.1                       | 75.021 | 6.072  | 18.167 | 0 | 0.029 | 0.168 | 0.006 | 0     | 99.463    | 0.248 |
| BF288_24MHP225_2.2                       | 75.493 | 6.038  | 18.292 | 0 | 0.018 | 0.247 | 0     | 0     | 100.088   | 0.246 |
| BF288_24MHP225_3.1                       | 76.297 | 5.677  | 18.571 | 0 | 0     | 0.258 | 0     | 0     | 100.803   | 0.232 |
| BF288_24MHP225_4.1                       | 75.181 | 5.792  | 18.401 | 0 | 0.036 | 0.262 | 0     | 0     | 99.672    | 0.237 |
| BF288_24MHP225_5.1                       | 75.069 | 7.389  | 16.816 | 0 | 0.01  | 0.358 | 0.01  | 0     | 99.652    | 0.303 |
| BF288_24MHP225_6.1                       | 75.066 | 7.057  | 17.137 | 0 | 0     | 0.212 | 0     | 0.008 | 99.48     | 0.289 |
| BF288_24MHP225_6.2                       | 75.617 | 6.858  | 17.391 | 0 | 0     | 0.23  | 0.03  | 0     | 100.126   | 0.280 |
| BF288_24MHP225_7.1                       | 75.47  | 6.407  | 17.766 | 0 | 0     | 0.204 | 0     | 0.006 | 99.853    | 0.263 |
| BF288_24MHP225_8.1                       | 74.815 | 5.187  | 18.907 | 0 | 0.026 | 0.222 | 0.018 | 0     | 99.175    | 0.213 |
| 24MHP225 (average, n=10)                 | 75.29  | 6.23   | 17.98  |   |       | 0.28  |       |       |           | 0.25  |
| %RSD                                     | 0.59   | 11.10  | 3.77   |   |       | 46.96 |       |       |           | 11.09 |
| BF288_25YFDJS01_1.1                      | 75.495 | 12.642 | 11.778 | 0 | 0.084 | 0.176 | 0.013 | 0     | 100.188   | 0.515 |
| BF288_25YFDJS01_2.1                      | 75.516 | 12.41  | 11.84  | 0 | 0.051 | 0.306 | 0     | 0     | 100.123   | 0.509 |
| BF288_25YFDJS01_3.1                      | 75.702 | 12.616 | 11.69  | 0 | 0     | 0.209 | 0     | 0     | 100.217   | 0.516 |
| BF288_25YFDJS01_5.1                      | 75.052 | 12.285 | 11.954 | 0 | 0.034 | 0.27  | 0     | 0     | 99.595    | 0.504 |
| BF288_25YFDJS01_8.1                      | 75.574 | 12.315 | 11.875 | 0 | 0.034 | 0.399 | 0.039 | 0.03  | 100.266   | 0.506 |
| BF288_25YFDJS01_9.1                      | 75.676 | 12.423 | 11.965 | 0 | 0     | 0.112 | 0     | 0     | 100.176   | 0.506 |
| BF288_25YFDJS01_10.1                     | 75.29  | 12.143 | 12.369 | 0 | 0.01  | 0.399 | 0     | 0.012 | 100.223   | 0.492 |
| BF288_25YFDJS01_13.1                     | 74.824 | 13.069 | 11.33  | 0 | 0     | 0.399 | 0     | 0     | 99.622    | 0.532 |
| BF288_25YFDJS01_14.1                     | 75.257 | 12.183 | 12.221 | 0 | 0     | 0.234 | 0     | 0     | 99.895    | 0.496 |
| BF288_25YFDJS01_16.1                     | 75.038 | 12.244 | 12.075 | 0 | 0     | 0.452 | 0.04  | 0     | 99.849    | 0.500 |
| BF288_25YFDJS01_17.1                     | 75.42  | 12.465 | 11.985 | 0 | 0.114 | 0.291 | 0     | 0     | 100.275   | 0.507 |
| BF288_25YFDJS01_18.1                     | 75.407 | 12.775 | 11.363 | 0 | 0     | 0.255 | 0     | 0     | 99.8      | 0.526 |
| BF288_25YFDJS01_20.1                     | 75.469 | 12.518 | 12.091 | 0 | 0.032 | 0.284 | 0     | 0     | 100.394   | 0.506 |
| 25YFDJS01 (average, n=13)                | 75.36  | 12.47  | 11.89  |   |       | 0.29  |       |       |           | 0.51  |
| %RSD                                     | 0.35   | 2.08   | 2.52   |   |       | 34.07 |       |       |           | 2.20  |
| Average calculated from mutiple sessions |        |        |        |   |       |       |       |       |           |       |
| 24MHP12B                                 | 75.42  | 4.16   | 20.18  |   |       | 0.16  |       |       | 99.94 149 | 0.169 |
| WHF1                                     | 75.44  | 1.11   | 23.00  |   |       | 0.14  |       |       | 99.75 36  | 0.046 |
| WHF2                                     | 75.38  | 0.04   | 24.23  |   |       | 0.19  |       |       | 99.89 36  | 0.002 |
| WHF3                                     | 75.36  | 20.50  | 3.81   |   |       | 0.17  |       |       | 99.86 29  | 0.842 |

Table S1

|           |       |        |       |        |        |        |       |
|-----------|-------|--------|-------|--------|--------|--------|-------|
| WHF11     | 75.51 | 16.29  | 7.98  | 0.06   | 99.86  | 34     | 0.668 |
| WHF12     | 75.53 | 16.47  | 7.83  | 0.05   | 99.90  | 29     | 0.675 |
| 23DHT24J  | 75.52 | 21.33  | 2.66  | 0.03   | 99.57  | 96     | 0.888 |
| 24MHP43   | 75.26 | 14.52  | 9.30  | 0.05   | 99.14  | 43     | 0.606 |
| 24MHP212  | 75.46 | 5.63   | 18.74 | 0.31   | 100.15 | 95     | 0.229 |
| 24MHP225  | 75.29 | 6.23   | 17.98 | 0.28   | 99.80  | 10     | 0.255 |
| 24MHP409  | 75.92 | 12.12  | 11.98 | 0.06   | 100.11 | 50     | 0.500 |
| 24MHP414A | 75.58 | 11.64  | 12.37 | 0.07   | 99.69  | 20     | 0.482 |
| 24MHP415A | 75.83 | 12.31  | 11.81 | 0.10   | 100.07 | 30     | 0.507 |
| 24MHP416  | 75.81 | 12.93  | 11.22 | 0.07   | 100.06 | 30     | 0.532 |
| 24MHP889  | 75.57 | 13.57  | 10.52 | 0.04   | 99.71  | 19     | 0.560 |
| 25YFDJS01 | 75.36 | 12.47  | 11.89 | 0.29   | 100.05 | 13     | 0.509 |
| %RSD      |       |        |       |        |        |        |       |
| 24MHP12B  | 0.63  | 17.10  | 3.69  | 44.20  | 0.55   | 17.24  |       |
| WHF1      | 0.63  | 111.67 | 5.67  | 49.64  | 0.63   | 111.09 |       |
| WHF2      | 0.51  | 39.36  | 0.83  | 52.17  | 0.50   | 39.21  |       |
| WHF3      | 0.47  | 3.43   | 18.00 | 44.23  | 0.36   | 3.36   |       |
| WHF11     | 0.62  | 3.99   | 8.19  | 103.58 | 0.37   | 4.00   |       |
| WHF12     | 0.62  | 2.75   | 5.47  | 108.81 | 0.43   | 2.62   |       |
| 23DHT24J  | 0.66  | 1.75   | 14.28 | 148.16 | 0.52   | 1.78   |       |
| 24MHP43   | 0.61  | 9.05   | 13.38 | 100.93 | 0.53   | 8.81   |       |
| 24MHP212  | 0.52  | 15.33  | 4.89  | 27.39  | 0.45   | 15.64  |       |
| 24MHP225  | 0.59  | 11.10  | 3.77  | 46.96  | 0.46   | 11.09  |       |
| 24MHP409  | 0.49  | 12.43  | 13.14 | 90.26  | 0.41   | 12.80  |       |
| 24MHP414A | 0.56  | 13.99  | 13.62 | 74.47  | 0.59   | 14.27  |       |
| 24MHP415A | 0.57  | 18.78  | 20.07 | 62.71  | 0.51   | 19.14  |       |
| 24MHP416  | 0.38  | 9.44   | 10.83 | 84.69  | 0.40   | 9.48   |       |
| 24MHP889  | 0.97  | 13.13  | 17.10 | 101.79 | 0.92   | 13.28  |       |
| 25YFDJS01 | 0.35  | 2.08   | 2.52  | 34.07  | 0.26   | 2.20   |       |
