# Supplementary material
Source: Royal Society of Chemistry journal article supplement (doi:10.1039/d6ja00086j)
Supplement: d6ja00086j2.pdf [file d6ja00086j2.pdf]

**Table S2. SIMS wolframite d18O data, analysed by CAMECA IMS-1280 and SHRIMP SI.**

CPS: counts per second; RM: primary reference material, 24MHP12B wolframite.

Yield-R % = [(16O/IP)/average(16O/IP)RM - 1]\*100.

| Mount_Sample_Grain.Analysis   | IP (nA)         | <sup>16</sup> O (CPS) | Raw <sup>18</sup> O/ <sup>16</sup> O Ratio ±2s | δ <sup>18</sup> O (‰, VSMOW) (vs RM) calc | IMF (‰), calc | δ <sup>18</sup> O (‰, VSMOW) LF or ME- ±2s corr | ±2s (internal) | ±2s (external) | Comments | 16O/IP (unit: 1.0E9 cps/nA) | Yield-R (%) | IMF (‰), true | XFe (mol%, EPMA) | δ <sup>18</sup> O <sub>ME</sub> (‰, VSMOW), av. ±2sd |
|-------------------------------|-----------------|-----------------------|------------------------------------------------|-------------------------------------------|---------------|-------------------------------------------------|----------------|----------------|----------|-----------------------------|-------------|---------------|------------------|------------------------------------------------------|
| <b>CAMECA IMS-1280</b>        |                 |                       |                                                |                                           |               |                                                 |                |                |          |                             |             |               |                  |                                                      |
| <b>Session-241018</b>         |                 |                       |                                                |                                           |               |                                                 |                |                |          |                             |             |               |                  |                                                      |
| <b>BF188</b>                  |                 |                       |                                                |                                           |               |                                                 |                |                |          |                             |             |               |                  |                                                      |
| 24MHP12B wolframite (average, |                 |                       |                                                |                                           |               |                                                 |                |                |          |                             |             |               |                  |                                                      |
| 1                             | n=19 out of 21) |                       | 2.254E+09                                      | 1.991E-03                                 | 9.097E-07     | <b>1.11</b>                                     |                | <b>1.11</b>    |          |                             |             |               |                  | <b>0.67 0.56</b>                                     |
|                               | 24MHP12B@1      | 1.33                  | 1.986E+09                                      | 1.983E-03                                 | 2.676E-07     | <b>-2.64</b>                                    | <b>0.17</b>    |                | rejected | 1.7029                      |             | <b>0.00</b>   | 0.190            |                                                      |
|                               | 24MHP12B@2      | 1.33                  | 2.255E+09                                      | 1.990E-03                                 | 2.156E-07     | <b>0.85</b>                                     | <b>0.27</b>    | <b>0.59</b>    | 0.11     | <b>0.47</b>                 | 1.70        | -0.20         | <b>-0.26</b>     | 0.176                                                |
|                               | 24MHP12B@3      | 1.33                  | 2.220E+09                                      | 1.990E-03                                 | 1.941E-07     | <b>0.63</b>                                     | <b>0.48</b>    | <b>0.15</b>    | 0.10     | <b>0.46</b>                 | 1.67        | -1.64         | <b>-0.48</b>     | 0.141                                                |
|                               | 24MHP12B@4      | 1.33                  | 2.215E+09                                      | 1.990E-03                                 | 2.543E-07     | <b>0.70</b>                                     | <b>0.17</b>    | <b>0.53</b>    | 0.13     | <b>0.47</b>                 | 1.67        | -1.82         | <b>-0.41</b>     | 0.190                                                |
|                               | 24MHP12B@5      | 1.32                  | 1.913E+09                                      | 1.982E-03                                 | 2.383E-07     | <b>-3.18</b>                                    | <b>0.27</b>    |                | rejected |                             |             |               | 0.175            |                                                      |
|                               | 24MHP12B@6      | 1.37                  | 2.313E+09                                      | 1.991E-03                                 | 2.002E-07     | <b>1.20</b>                                     | <b>0.25</b>    | <b>0.95</b>    | 0.10     | <b>0.46</b>                 | 1.68        | -1.09         | <b>0.09</b>      | 0.178                                                |
|                               | 24MHP12B@7      | 1.36                  | 2.301E+09                                      | 1.991E-03                                 | 1.644E-07     | <b>1.23</b>                                     | <b>0.49</b>    | <b>0.74</b>    | 0.08     | <b>0.46</b>                 | 1.69        | -0.83         | <b>0.12</b>      | 0.139                                                |
|                               | 24MHP12B_8      | 1.33                  | 2.262E+09                                      | 1.991E-03                                 | 2.335E-07     | <b>1.15</b>                                     | <b>0.25</b>    | <b>0.90</b>    | 0.12     | <b>0.47</b>                 | 1.70        | -0.32         | <b>0.04</b>      | 0.178                                                |
|                               | 24MHP12B_9      | 1.32                  | 2.283E+09                                      | 1.991E-03                                 | 2.231E-07     | <b>1.31</b>                                     | <b>0.44</b>    | <b>0.87</b>    | 0.11     | <b>0.47</b>                 | 1.72        | 1.24          | <b>0.20</b>      | 0.147                                                |
|                               | 24MHP12B_10     | 1.32                  | 2.250E+09                                      | 1.991E-03                                 | 2.430E-07     | <b>1.20</b>                                     |                |                | 0.12     | <b>0.47</b>                 | 1.70        | 0.10          | <b>0.09</b>      |                                                      |
|                               | 24MHP12B_11     | 1.32                  | 2.237E+09                                      | 1.990E-03                                 | 1.926E-07     | <b>0.94</b>                                     |                |                | 0.10     | <b>0.46</b>                 | 1.70        | -0.46         | <b>-0.17</b>     |                                                      |
|                               | 24MHP12B_12     | 1.32                  | 2.242E+09                                      | 1.991E-03                                 | 2.089E-07     | <b>1.40</b>                                     |                |                | 0.10     | <b>0.47</b>                 | 1.70        | -0.06         | <b>0.29</b>      |                                                      |
|                               | 24MHP12B_13     | 1.32                  | 2.276E+09                                      | 1.991E-03                                 | 2.682E-07     | <b>1.45</b>                                     |                |                | 0.13     | <b>0.47</b>                 | 1.73        | 1.52          | <b>0.34</b>      |                                                      |
|                               | 24MHP12B_14     | 1.32                  | 2.285E+09                                      | 1.991E-03                                 | 2.329E-07     | <b>1.23</b>                                     |                |                | 0.12     | <b>0.47</b>                 | 1.73        | 1.55          | <b>0.12</b>      |                                                      |
|                               | 24MHP12B_15     | 1.32                  | 2.264E+09                                      | 1.991E-03                                 | 2.330E-07     | <b>1.22</b>                                     |                |                | 0.12     | <b>0.47</b>                 | 1.72        | 0.95          | <b>0.11</b>      |                                                      |
|                               | 24MHP12B_16     | 1.31                  | 2.253E+09                                      | 1.991E-03                                 | 2.381E-07     | <b>1.21</b>                                     |                |                | 0.12     | <b>0.47</b>                 | 1.71        | 0.65          | <b>0.10</b>      |                                                      |
|                               | 24MHP12B_17     | 1.31                  | 2.202E+09                                      | 1.990E-03                                 | 2.273E-07     | <b>0.91</b>                                     |                |                | 0.11     | <b>0.47</b>                 | 1.68        | -1.29         | <b>-0.20</b>     |                                                      |
|                               | 24MHP12B_18     | 1.31                  | 2.241E+09                                      | 1.991E-03                                 | 1.996E-07     | <b>1.22</b>                                     |                |                | 0.10     | <b>0.46</b>                 | 1.71        | 0.42          | <b>0.11</b>      |                                                      |
|                               | 24MHP12B_19     | 1.31                  | 2.233E+09                                      | 1.990E-03                                 | 1.819E-07     | <b>0.88</b>                                     |                |                | 0.09     | <b>0.46</b>                 | 1.71        | 0.15          | <b>-0.23</b>     |                                                      |
|                               | 24MHP12B_20     | 1.31                  | 2.246E+09                                      | 1.991E-03                                 | 2.613E-07     | <b>1.28</b>                                     |                |                | 0.13     | <b>0.47</b>                 | 1.72        | 0.75          | <b>0.17</b>      |                                                      |
|                               | 24MHP12B_21     | 1.31                  | 2.241E+09                                      | 1.991E-03                                 | 2.614E-07     | <b>1.08</b>                                     |                |                | 0.13     | <b>0.47</b>                 | 1.71        | 0.41          | <b>-0.03</b>     |                                                      |
| 23DHT24J wolframite (average, |                 |                       |                                                |                                           |               |                                                 |                |                |          |                             |             |               |                  |                                                      |
| 1                             | n=5 out of 9)   |                       | 1.402E+09                                      | 1.974E-03                                 | 8.202E-07     | <b>-7.33</b>                                    |                | <b>5.40</b>    |          |                             |             |               |                  |                                                      |
|                               | 23DHT24J@1      | 1.33                  | 1.479E+09                                      | 1.976E-03                                 | 3.535E-07     | <b>-6.23</b>                                    | <b>-12.58</b>  |                | 0.18     | <b>0.49</b>                 | rejected    |               | <b>-11.63</b>    | 0.890                                                |
|                               | 23DHT24J@2      | 1.32                  | 1.407E+09                                      | 1.974E-03                                 | 2.899E-07     | <b>-7.34</b>                                    |                |                | 0.14     | <b>0.48</b>                 | 1.06        | -37.56        | <b>-12.74</b>    |                                                      |
|                               | 23DHT24J_3      | 1.33                  | 1.511E+09                                      | 1.977E-03                                 | 2.580E-07     | <b>-5.92</b>                                    |                |                | 0.13     | <b>0.47</b>                 | rejected    |               |                  |                                                      |
|                               | 23DHT24J_4      | 1.32                  | 1.497E+09                                      | 1.977E-03                                 | 2.838E-07     | <b>-5.78</b>                                    |                |                | 0.14     | <b>0.48</b>                 | rejected    |               |                  |                                                      |
|                               | 23DHT24J_5      | 1.32                  | 1.504E+09                                      | 1.977E-03                                 | 3.201E-07     | <b>-5.81</b>                                    |                |                | 0.16     | <b>0.48</b>                 | rejected    |               |                  |                                                      |
|                               | 23DHT24J_6      | 1.32                  | 1.401E+09                                      | 1.973E-03                                 | 3.534E-07     | <b>-7.56</b>                                    |                |                | 0.18     | <b>0.49</b>                 | 1.06        | -37.52        | <b>-12.96</b>    |                                                      |
|                               | 23DHT24J_7      | 1.31                  | 1.408E+09                                      | 1.974E-03                                 | 2.232E-07     | <b>-6.99</b>                                    |                |                | 0.11     | <b>0.47</b>                 | 1.07        | -37.10        | <b>-12.39</b>    |                                                      |
|                               | 23DHT24J_8      | 1.31                  | 1.398E+09                                      | 1.974E-03                                 | 3.093E-07     | <b>-7.35</b>                                    |                |                | 0.15     | <b>0.48</b>                 | 1.06        | -37.49        | <b>-12.75</b>    |                                                      |
|                               | 23DHT24J_9      | 1.31                  | 1.394E+09                                      | 1.974E-03                                 | 2.916E-07     | <b>-7.38</b>                                    |                |                | 0.15     | <b>0.48</b>                 | 1.06        | -37.51        | <b>-12.78</b>    |                                                      |

| <b>BF189</b>                                  |      |           |           |           |              |               |             |      |             |                    |        |                                |
|-----------------------------------------------|------|-----------|-----------|-----------|--------------|---------------|-------------|------|-------------|--------------------|--------|--------------------------------|
| 24MHP12B wolframite (average, n=11 out of 12) |      |           |           |           |              |               |             |      |             |                    |        |                                |
|                                               |      | 2.241E+09 | 1.991E-03 | 4.319E-07 | <b>1.11</b>  |               | <b>1.11</b> |      | <b>0.22</b> | 1.7053             |        | <b>0.72 0.42</b>               |
| 24MHP12B_C1-1                                 | 1.32 | 2.251E+09 | 1.991E-03 | 3.136E-07 | <b>1.06</b>  | <b>0.51</b>   | <b>0.55</b> | 0.16 | <b>0.27</b> | 1.71               | 0.29   | <b>-0.05</b> 0.135             |
| 24MHP12B_C1-2                                 | 1.31 | 2.262E+09 | 1.991E-03 | 2.044E-07 | <b>1.29</b>  | <b>0.51</b>   | <b>0.78</b> | 0.10 | <b>0.24</b> | 1.72               | 1.00   | <b>0.18</b> 0.134              |
| 24MHP12B_C2-1                                 | 1.32 | 2.260E+09 | 1.991E-03 | 2.732E-07 | <b>1.06</b>  | <b>0.44</b>   | <b>0.62</b> | 0.14 | <b>0.25</b> | 1.72               | 0.66   | <b>-0.05</b> 0.148             |
| 24MHP12B_C3-1                                 | 1.31 | 2.267E+09 | 1.991E-03 | 2.164E-07 | <b>1.21</b>  | <b>0.26</b>   | <b>0.95</b> | 0.11 | <b>0.24</b> | 1.73               | 1.20   | <b>0.10</b> 0.176              |
| 24MHP12B_C4-1                                 | 1.36 | 2.323E+09 | 1.991E-03 | 2.432E-07 | <b>1.05</b>  | <b>0.67</b>   | <b>0.38</b> | 0.12 | <b>0.25</b> | 1.70               | -0.13  | <b>-0.06</b> 0.102             |
| 24MHP12B_C5-1                                 | 1.32 | 2.246E+09 | 1.991E-03 | 2.267E-07 | <b>1.11</b>  | <b>0.25</b>   | <b>0.85</b> | 0.11 | <b>0.24</b> | 1.70               | -0.43  | <b>0.00</b> 0.178              |
| 24MHP12B_C6-1                                 | 1.31 | 2.291E+09 | 1.991E-03 | 2.694E-07 | <b>1.05</b>  | <b>0.13</b>   | <b>0.92</b> | 0.13 | <b>0.25</b> | 1.74               | 2.33   | <b>-0.06</b> 0.195             |
| 24MHP12B_SE1-1                                | 1.31 | 2.191E+09 | 1.991E-03 | 2.125E-07 | <b>0.90</b>  | <b>0.43</b>   | <b>0.47</b> | 0.11 | <b>0.24</b> | 1.68               | -1.62  | <b>-0.21</b> 0.148             |
| 24MHP12B_SE2-1                                | 1.30 | 2.195E+09 | 1.991E-03 | 2.405E-07 | <b>1.23</b>  | <b>0.43</b>   | <b>0.80</b> | 0.12 | <b>0.25</b> | 1.69               | -1.10  | <b>0.12</b> 0.148              |
| 24MHP12B_SE3-1                                | 1.30 | 2.230E+09 | 1.991E-03 | 2.653E-07 | <b>1.16</b>  | <b>0.61</b>   | <b>0.55</b> | 0.13 | <b>0.25</b> | 1.72               | 0.85   | <b>0.05</b> 0.115              |
| 24MHP12B_SE4-1                                | 1.29 | 2.139E+09 | 1.991E-03 | 2.870E-07 | <b>1.09</b>  | <b>0.08</b>   | <b>1.00</b> | 0.14 | <b>0.26</b> | 1.65               | -3.04  | <b>-0.02</b> 0.202             |
| 24MHP12B_SE6-1                                | 1.30 | 2.152E+09 | 1.991E-03 | 2.468E-07 | <b>1.20</b>  | <b>-0.85</b>  | <b>2.06</b> | 0.12 | <b>0.25</b> | outlier; rejected  |        | <b>0.09</b> 0.305              |
| 23DHT24J wolframite (average, n=6)            |      |           |           |           |              |               |             |      |             |                    |        |                                |
|                                               |      | 1.390E+09 | 1.974E-03 | 1.162E-06 | <b>-7.49</b> |               | <b>5.40</b> |      | <b>0.58</b> |                    |        | <b>-12.89</b> <b>5.13 0.63</b> |
| 23DHT24J_C1-1                                 | 1.32 | 1.398E+09 | 1.974E-03 | 3.241E-07 | <b>-7.43</b> | <b>-12.85</b> | <b>5.42</b> | 0.16 | <b>0.27</b> | 1.06               | -37.69 | <b>-12.83</b> 0.899            |
| 23DHT24J_C1-1@0                               | 1.39 | 1.494E+09 | 1.975E-03 | 2.444E-07 | <b>-7.16</b> | <b>-12.23</b> | <b>5.06</b> | 0.12 | <b>0.25</b> | 1.08               | -36.76 | <b>-12.56</b> 0.878            |
| 23DHT24J_C2-1                                 | 1.31 | 1.389E+09 | 1.973E-03 | 3.857E-07 | <b>-7.80</b> |               |             | 0.19 | <b>0.29</b> | 1.06               | -37.99 | <b>-13.20</b>                  |
| 23DHT24J_SE1-1                                | 1.31 | 1.330E+09 | 1.973E-03 | 3.118E-07 | <b>-7.85</b> | <b>-12.57</b> | <b>4.72</b> | 0.16 | <b>0.27</b> | 1.02               | -40.39 | <b>-13.25</b> 0.890            |
| 23DHT24J_SE2-1                                | 1.30 | 1.353E+09 | 1.974E-03 | 2.889E-07 | <b>-7.53</b> | <b>-12.86</b> | <b>5.32</b> | 0.14 | <b>0.26</b> | 1.04               | -38.88 | <b>-12.93</b> 0.900            |
| 23DHT24J_SE1-2                                | 1.30 | 1.374E+09 | 1.974E-03 | 2.875E-07 | <b>-7.20</b> |               |             | 0.14 | <b>0.26</b> | 1.06               | -37.88 | <b>-12.60</b>                  |
| <b>BF197</b>                                  |      |           |           |           |              |               |             |      |             |                    |        |                                |
| 24MHP12B wolframite (average, n=24)           |      |           |           |           |              |               |             |      |             |                    |        |                                |
|                                               |      | 2.209E+09 | 1.991E-03 | 6.257E-07 | <b>1.11</b>  |               | <b>1.11</b> |      | <b>0.31</b> | 1.7394             |        | <b>0.63 0.42</b>               |
| 24MHP12B_1-1                                  | 1.32 | 2.255E+09 | 1.991E-03 | 2.006E-07 | <b>0.97</b>  | <b>0.14</b>   | <b>0.83</b> | 0.10 | <b>0.33</b> | 1.71               | -1.48  | <b>-0.14</b> 0.195             |
| 24MHP12B_1-2                                  | 1.31 | 2.250E+09 | 1.991E-03 | 2.705E-07 | <b>0.94</b>  |               |             | 0.13 | <b>0.34</b> | 1.72               | -1.08  | <b>-0.17</b>                   |
| 24MHP12B_1-3                                  | 1.28 | 2.192E+09 | 1.991E-03 | 1.802E-07 | <b>1.24</b>  |               |             | 0.09 | <b>0.32</b> | 1.72               | -1.19  | <b>0.13</b>                    |
| 24MHP12B_2-1                                  | 1.30 | 2.245E+09 | 1.991E-03 | 1.710E-07 | <b>0.87</b>  | <b>0.24</b>   | <b>0.63</b> | 0.09 | <b>0.32</b> | 1.73               | -0.75  | <b>-0.24</b> 0.180             |
| 24MHP12B_2-2                                  | 1.28 | 2.216E+09 | 1.991E-03 | 2.525E-07 | <b>1.12</b>  |               |             | 0.13 | <b>0.34</b> | 1.74               | -0.13  | <b>0.01</b>                    |
| 24MHP12B_3-1                                  | 1.30 | 2.261E+09 | 1.991E-03 | 2.005E-07 | <b>0.85</b>  | <b>0.47</b>   | <b>0.38</b> | 0.10 | <b>0.33</b> | 1.74               | 0.13   | <b>-0.26</b> 0.142             |
| 24MHP12B_3-2                                  | 1.27 | 2.234E+09 | 1.991E-03 | 2.101E-07 | <b>1.25</b>  |               |             | 0.10 | <b>0.33</b> | 1.75               | 0.88   | <b>0.14</b>                    |
| 24MHP12B_4-1                                  | 1.33 | 2.326E+09 | 1.991E-03 | 2.021E-07 | <b>1.13</b>  | <b>0.46</b>   | <b>0.67</b> | 0.10 | <b>0.33</b> | 1.74               | 0.21   | <b>0.02</b> 0.144              |
| 24MHP12B_4-2                                  | 1.27 | 2.243E+09 | 1.991E-03 | 2.185E-07 | <b>1.28</b>  |               |             | 0.11 | <b>0.33</b> | 1.76               | 1.18   | <b>0.17</b>                    |
| 24MHP12B_4-4                                  | 1.22 | 2.165E+09 | 1.991E-03 | 2.212E-07 | <b>1.22</b>  |               |             | 0.11 | <b>0.33</b> | 1.77               | 1.72   | <b>0.11</b>                    |
| 24MHP12B_5-1                                  | 1.30 | 2.278E+09 | 1.991E-03 | 2.406E-07 | <b>1.19</b>  | <b>0.46</b>   | <b>0.74</b> | 0.12 | <b>0.33</b> | 1.75               | 0.46   | <b>0.08</b> 0.144              |
| 24MHP12B_5-2                                  | 1.27 | 2.234E+09 | 1.991E-03 | 1.942E-07 | <b>1.23</b>  |               |             | 0.10 | <b>0.33</b> | 1.76               | 1.01   | <b>0.12</b>                    |
| 24MHP12B_5-2_new                              | 1.22 | 2.110E+09 | 1.991E-03 | 2.600E-07 | <b>1.16</b>  |               |             | 0.13 | <b>0.34</b> | disrupted by spark |        |                                |
| 24MHP12B_6-1                                  | 1.29 | 2.228E+09 | 1.991E-03 | 2.480E-07 | <b>1.06</b>  | <b>0.24</b>   | <b>0.82</b> | 0.12 | <b>0.34</b> | 1.72               | -1.03  | <b>-0.05</b> 0.180             |
| 24MHP12B_6-2                                  | 1.22 | 2.117E+09 | 1.991E-03 | 2.454E-07 | <b>1.18</b>  |               |             | 0.12 | <b>0.34</b> | 1.73               | -0.36  | <b>0.07</b>                    |
| 24MHP12B_6-3                                  | 1.22 | 2.116E+09 | 1.991E-03 | 2.567E-07 | <b>1.24</b>  |               |             | 0.13 | <b>0.34</b> | 1.73               | -0.61  | <b>0.13</b>                    |
| 24MHP12B_7-1                                  | 1.32 | 2.308E+09 | 1.991E-03 | 2.707E-07 | <b>0.84</b>  | <b>0.62</b>   | <b>0.22</b> | 0.14 | <b>0.34</b> | 1.75               | 0.55   | <b>-0.27</b> 0.113             |
| 24MHP12B_7-2                                  | 1.29 | 2.259E+09 | 1.991E-03 | 1.959E-07 | <b>0.99</b>  |               |             | 0.10 | <b>0.33</b> | 1.75               | 0.47   | <b>-0.12</b>                   |
| 24MHP12B_7-3                                  | 1.23 | 2.160E+09 | 1.991E-03 | 2.320E-07 | <b>1.25</b>  |               |             | 0.12 | <b>0.33</b> | 1.76               | 1.35   | <b>0.14</b>                    |

|                                          |      |           |           |           |              |               |             |      |             |        |        |               |                  |
|------------------------------------------|------|-----------|-----------|-----------|--------------|---------------|-------------|------|-------------|--------|--------|---------------|------------------|
| 24MHP12B_7-4                             | 1.22 | 2.127E+09 | 1.991E-03 | 2.692E-07 | <b>1.19</b>  |               |             | 0.13 | <b>0.34</b> | 1.74   | 0.05   | <b>0.08</b>   |                  |
| 24MHP12B_8-1                             | 1.28 | 2.204E+09 | 1.991E-03 | 2.571E-07 | <b>0.85</b>  | <b>0.28</b>   | <b>0.57</b> | 0.13 | <b>0.34</b> | 1.72   | -1.12  | <b>-0.26</b>  | 0.173            |
| 24MHP12B_8-2                             | 1.23 | 2.116E+09 | 1.991E-03 | 2.037E-07 | <b>1.00</b>  |               |             | 0.10 | <b>0.33</b> | 1.72   | -0.90  | <b>-0.11</b>  |                  |
| 24MHP12B_9-1                             | 1.28 | 2.236E+09 | 1.992E-03 | 2.424E-07 | <b>1.34</b>  | <b>0.52</b>   | <b>0.82</b> | 0.12 | <b>0.33</b> | 1.75   | 0.44   | <b>0.23</b>   | 0.133            |
| 24MHP12B_9-2                             | 1.22 | 2.132E+09 | 1.991E-03 | 2.270E-07 | <b>1.25</b>  |               |             | 0.11 | <b>0.33</b> | 1.75   | 0.40   | <b>0.14</b>   |                  |
| 23DHT24J wolframite (average,<br>1 n=21) |      | 1.386E+09 | 1.975E-03 | 1.326E-06 | <b>-7.11</b> |               | <b>5.40</b> |      | <b>0.66</b> |        |        | <b>-12.51</b> | <b>5.23 0.71</b> |
| 23DHT24J_1-1                             | 1.31 | 1.441E+09 | 1.975E-03 | 2.627E-07 | <b>-6.93</b> | <b>-12.39</b> | <b>5.46</b> | 0.13 | <b>0.34</b> | 1.10   | -36.83 | <b>-12.33</b> | 0.884            |
| 23DHT24J_1-2                             | 1.30 | 1.406E+09 | 1.974E-03 | 2.715E-07 | <b>-7.55</b> | <b>-12.38</b> | <b>4.82</b> | 0.14 | <b>0.34</b> | 1.08   | -37.84 | <b>-12.95</b> | 0.883            |
| 23DHT24J_1-3                             | 1.31 | 1.415E+09 | 1.975E-03 | 3.267E-07 | <b>-7.20</b> |               |             | 0.16 | <b>0.35</b> | 1.08   | -37.69 | <b>-12.60</b> |                  |
| 23DHT24J_1-4                             | 1.29 | 1.377E+09 | 1.974E-03 | 3.188E-07 | <b>-7.46</b> |               |             | 0.16 | <b>0.35</b> | 1.07   | -38.44 | <b>-12.86</b> |                  |
| 23DHT24J_1-5                             | 1.28 | 1.407E+09 | 1.975E-03 | 2.882E-07 | <b>-6.83</b> |               |             | 0.14 | <b>0.34</b> | 1.10   | -36.96 | <b>-12.23</b> |                  |
| 23DHT24J_1-6                             | 1.27 | 1.383E+09 | 1.974E-03 | 3.044E-07 | <b>-7.30</b> |               |             | 0.15 | <b>0.35</b> | 1.09   | -37.51 | <b>-12.70</b> |                  |
| 23DHT24J_1-7                             | 1.27 | 1.396E+09 | 1.975E-03 | 3.734E-07 | <b>-7.21</b> |               |             | 0.19 | <b>0.36</b> | 1.10   | -36.87 | <b>-12.61</b> |                  |
| 23DHT24J_1-8                             | 1.21 | 1.387E+09 | 1.977E-03 | 3.045E-07 | <b>-6.08</b> |               |             | 0.15 | <b>0.35</b> | 1.14   | -34.24 | <b>-11.48</b> |                  |
| 23DHT24J_1-9                             | 1.23 | 1.368E+09 | 1.976E-03 | 3.297E-07 | <b>-6.67</b> |               |             | 0.16 | <b>0.35</b> | 1.12   | -35.79 | <b>-12.07</b> |                  |
| 23DHT24J_1-10                            | 1.22 | 1.350E+09 | 1.975E-03 | 3.136E-07 | <b>-6.90</b> |               |             | 0.16 | <b>0.35</b> | 1.10   | -36.60 | <b>-12.30</b> |                  |
| 23DHT24J_1-11                            | 1.22 | 1.341E+09 | 1.975E-03 | 3.419E-07 | <b>-7.05</b> |               |             | 0.17 | <b>0.36</b> | 1.10   | -36.70 | <b>-12.45</b> |                  |
| 23DHT24J_2-1                             | 1.31 | 1.411E+09 | 1.974E-03 | 2.165E-07 | <b>-7.36</b> | <b>-12.76</b> | <b>5.40</b> | 0.11 | <b>0.33</b> | 1.08   | -37.89 | <b>-12.76</b> | 0.897            |
| 23DHT24J_2-2                             | 1.35 | 1.444E+09 | 1.974E-03 | 3.142E-07 | <b>-7.41</b> |               |             | 0.16 | <b>0.35</b> | 1.07   | -38.44 | <b>-12.81</b> |                  |
| 23DHT24J_2-3                             | 1.30 | 1.405E+09 | 1.974E-03 | 3.436E-07 | <b>-7.26</b> |               |             | 0.17 | <b>0.36</b> | 1.08   | -37.73 | <b>-12.66</b> |                  |
| 23DHT24J_2-4                             | 1.29 | 1.393E+09 | 1.975E-03 | 3.065E-07 | <b>-7.21</b> |               |             | 0.15 | <b>0.35</b> | 1.08   | -37.72 | <b>-12.61</b> |                  |
| 23DHT24J_2-5                             | 1.28 | 1.394E+09 | 1.974E-03 | 3.008E-07 | <b>-7.24</b> |               |             | 0.15 | <b>0.35</b> | 1.09   | -37.34 | <b>-12.64</b> |                  |
| 23DHT24J_2-6                             | 1.27 | 1.380E+09 | 1.975E-03 | 3.151E-07 | <b>-7.08</b> |               |             | 0.16 | <b>0.35</b> | 1.08   | -37.75 | <b>-12.48</b> |                  |
| 23DHT24J_2-7                             | 1.27 | 1.387E+09 | 1.974E-03 | 3.262E-07 | <b>-7.46</b> |               |             | 0.16 | <b>0.35</b> | 1.09   | -37.17 | <b>-12.86</b> |                  |
| 23DHT24J_2-8                             | 1.22 | 1.341E+09 | 1.975E-03 | 3.851E-07 | <b>-6.97</b> |               |             | 0.19 | <b>0.37</b> | 1.10   | -37.04 | <b>-12.37</b> |                  |
| 23DHT24J_2-9                             | 1.22 | 1.349E+09 | 1.975E-03 | 3.135E-07 | <b>-6.85</b> |               |             | 0.16 | <b>0.35</b> | 1.10   | -36.67 | <b>-12.25</b> |                  |
| 23DHT24J_2-10                            | 1.22 | 1.335E+09 | 1.974E-03 | 1.950E-07 | <b>-7.29</b> |               |             | 0.10 | <b>0.33</b> | 1.09   | -37.17 | <b>-12.69</b> |                  |
| <b>BF184</b>                             |      |           |           |           |              |               |             |      |             |        |        |               |                  |
| 24MHP12B wolframite (average,<br>1 n=29) |      | 2.046E+09 | 1.991E-03 | 8.286E-07 | <b>1.11</b>  |               | <b>1.11</b> |      | <b>0.41</b> | 1.7400 |        |               | <b>0.81 0.24</b> |
| BF184_24MHP12B_1-1                       | 1.22 | 2.103E+09 | 1.991E-03 | 2.143E-07 | <b>0.92</b>  | <b>0.27</b>   | <b>0.65</b> | 0.11 | <b>0.43</b> | 1.72   | -1.04  | <b>-0.19</b>  | 0.175            |
| BF184_24MHP12B_2-1                       | 1.21 | 2.069E+09 | 1.991E-03 | 2.275E-07 | <b>0.83</b>  | <b>0.09</b>   | <b>0.74</b> | 0.11 | <b>0.43</b> | 1.71   | -1.96  | <b>-0.28</b>  | 0.201            |
| BF184_24MHP12B_2-2                       | 1.29 | 2.149E+09 | 1.991E-03 | 2.469E-07 | <b>0.86</b>  |               |             | 0.12 | <b>0.43</b> | 1.67   | -4.04  | <b>-0.25</b>  |                  |
| BF184_24MHP12B_6-1                       | 1.22 | 2.139E+09 | 1.992E-03 | 2.159E-07 | <b>1.41</b>  | <b>0.49</b>   | <b>0.92</b> | 0.11 | <b>0.43</b> | 1.75   | 0.66   | <b>0.30</b>   | 0.138            |
| BF184_24MHP12B_6-2                       | 1.15 | 2.018E+09 | 1.991E-03 | 2.598E-07 | <b>1.00</b>  |               |             | 0.13 | <b>0.43</b> | 1.75   | 0.48   | <b>-0.11</b>  |                  |
| BF184_24MHP12B_7-1                       | 1.21 | 2.087E+09 | 1.991E-03 | 2.130E-07 | <b>1.20</b>  | <b>0.28</b>   | <b>0.92</b> | 0.11 | <b>0.43</b> | 1.73   | -0.54  | <b>0.09</b>   | 0.174            |
| BF184_24MHP12B_7-2                       | 1.15 | 1.999E+09 | 1.992E-03 | 2.284E-07 | <b>1.36</b>  |               |             | 0.11 | <b>0.43</b> | 1.74   | 0.14   | <b>0.25</b>   |                  |
| BF184_24MHP12B_8-1                       | 1.20 | 2.090E+09 | 1.991E-03 | 2.522E-07 | <b>1.19</b>  | <b>0.39</b>   | <b>0.80</b> | 0.13 | <b>0.43</b> | 1.74   | 0.13   | <b>0.08</b>   | 0.157            |
| BF184_24MHP12B_8-2                       | 1.23 | 2.176E+09 | 1.991E-03 | 2.073E-07 | <b>1.20</b>  |               |             | 0.10 | <b>0.43</b> | 1.77   | 1.45   | <b>0.09</b>   |                  |
| BF184_24MHP12B_10-1                      | 1.19 | 2.049E+09 | 1.991E-03 | 2.380E-07 | <b>0.76</b>  | <b>0.00</b>   | <b>0.76</b> | 0.12 | <b>0.43</b> | 1.72   | -1.38  | <b>-0.35</b>  | 0.213            |
| BF184_24MHP12B_10-2                      | 1.16 | 2.012E+09 | 1.991E-03 | 2.735E-07 | <b>0.96</b>  |               |             | 0.14 | <b>0.44</b> | 1.73   | -0.63  | <b>-0.15</b>  |                  |
| BF184_24MHP12B_12-1                      | 1.19 | 2.093E+09 | 1.992E-03 | 2.349E-07 | <b>1.31</b>  | <b>0.49</b>   | <b>0.82</b> | 0.12 | <b>0.43</b> | 1.76   | 1.19   | <b>0.20</b>   | 0.139            |
| BF184_24MHP12B_12-2                      | 1.15 | 2.022E+09 | 1.991E-03 | 2.820E-07 | <b>1.16</b>  |               |             | 0.14 | <b>0.44</b> | 1.76   | 1.27   | <b>0.05</b>   |                  |
| BF184_24MHP12B_15-1                      | 1.19 | 2.104E+09 | 1.992E-03 | 1.985E-07 | <b>1.28</b>  | <b>0.56</b>   | <b>0.72</b> | 0.10 | <b>0.42</b> | 1.77   | 1.81   | <b>0.17</b>   | 0.126            |
| BF184_24MHP12B_15-2                      | 1.14 | 2.033E+09 | 1.992E-03 | 2.074E-07 | <b>1.52</b>  |               |             | 0.10 | <b>0.43</b> | 1.78   | 2.36   | <b>0.41</b>   |                  |

|                                         |                 |                      |                      |                      |                  |                  |                 |                 |                 |                   |        |                  |                  |
|-----------------------------------------|-----------------|----------------------|----------------------|----------------------|------------------|------------------|-----------------|-----------------|-----------------|-------------------|--------|------------------|------------------|
| BF184_24MHP12B_16-1                     | 1.18            | 2.078E+09            | 1.992E-03            | 2.122E-07            | <b>1.34</b>      | <b>0.45</b>      | <b>0.89</b>     | 0.11            | <b>0.43</b>     | 1.76              | 0.97   | <b>0.23</b>      | 0.146            |
| BF184_24MHP12B_16-2                     | 1.14            | 2.035E+09            | 1.992E-03            | 2.299E-07            | <b>1.51</b>      |                  |                 | 0.11            | <b>0.43</b>     | 1.79              | 2.96   | <b>0.40</b>      |                  |
| BF184_24MHP12B_20-1                     | 1.18            | 2.048E+09            | 1.991E-03            | 2.223E-07            | <b>1.20</b>      | <b>0.15</b>      | <b>1.05</b>     | 0.11            | <b>0.43</b>     | 1.74              | -0.19  | <b>0.09</b>      | 0.192            |
| BF184_24MHP12B_20-2                     | 1.13            | 1.966E+09            | 1.991E-03            | 2.155E-07            | <b>1.04</b>      |                  |                 | 0.11            | <b>0.43</b>     | 1.74              | -0.23  | <b>-0.07</b>     |                  |
| BF184_24MHP12B_23-1                     | 1.18            | 2.055E+09            | 1.991E-03            | 2.533E-07            | <b>1.23</b>      | <b>0.25</b>      | <b>0.98</b>     | 0.13            | <b>0.43</b>     | 1.75              | 0.42   | <b>0.12</b>      | 0.178            |
| BF184_24MHP12B_23-2                     | 1.13            | 1.972E+09            | 1.991E-03            | 3.147E-07            | <b>1.05</b>      |                  |                 | 0.16            | <b>0.44</b>     | 1.75              | 0.31   | <b>-0.06</b>     |                  |
| BF184_24MHP12B_26-1                     | 1.18            | 2.029E+09            | 1.991E-03            | 2.152E-07            | <b>0.90</b>      | <b>0.13</b>      | <b>0.78</b>     | 0.11            | <b>0.43</b>     | 1.72              | -0.90  | <b>-0.21</b>     | 0.196            |
| BF184_24MHP12B_26-2                     | 1.13            | 1.976E+09            | 1.991E-03            | 2.415E-07            | <b>0.94</b>      |                  |                 | 0.12            | <b>0.43</b>     | 1.75              | 0.57   | <b>-0.17</b>     |                  |
| BF184_24MHP12B_35-1                     | 1.17            | 2.016E+09            | 1.991E-03            | 3.609E-07            | <b>1.05</b>      | <b>0.25</b>      | <b>0.80</b>     | 0.18            | <b>0.45</b>     | 1.72              | -1.08  | <b>-0.06</b>     | 0.178            |
| BF184_24MHP12B_35-2                     | 1.13            | 1.964E+09            | 1.991E-03            | 3.245E-07            | <b>1.23</b>      |                  |                 | 0.16            | <b>0.44</b>     | 1.75              | 0.29   | <b>0.12</b>      |                  |
| BF184_24MHP12B_38-1                     | 1.17            | 2.015E+09            | 1.991E-03            | 2.622E-07            | <b>0.97</b>      | <b>0.18</b>      | <b>0.79</b>     | 0.13            | <b>0.43</b>     | 1.72              | -0.91  | <b>-0.14</b>     | 0.188            |
| BF184_24MHP12B_39-1                     | 1.16            | 2.016E+09            | 1.991E-03            | 2.089E-07            | <b>0.99</b>      | <b>0.20</b>      | <b>0.79</b>     | 0.10            | <b>0.43</b>     | 1.73              | -0.54  | <b>-0.12</b>     | 0.185            |
| BF184_24MHP12B_42-1                     | 1.16            | 1.992E+09            | 1.991E-03            | 3.009E-07            | <b>0.94</b>      | <b>0.19</b>      | <b>0.75</b>     | 0.15            | <b>0.44</b>     | 1.71              | -1.46  | <b>-0.17</b>     | 0.187            |
| BF184_24MHP12B_45-1                     | 1.16            | 2.015E+09            | 1.991E-03            | 3.340E-07            | <b>0.84</b>      | <b>0.30</b>      | <b>0.55</b>     | 0.17            | <b>0.45</b>     | 1.74              | -0.07  | <b>-0.27</b>     | 0.171            |
| 23DHT24J wolframite (average,<br>n=14)  |                 | 1.303E+09            | 1.975E-03            | 1.520E-06            | <b>-7.21</b>     |                  | <b>5.40</b>     |                 | <b>0.76</b>     | 23DHT24J: Fe-rich |        | <b>-12.61</b>    | <b>5.20 0.81</b> |
| BF184_23DHT24J_1-1                      | 1.22            | 1.375E+09            | 1.975E-03            | 2.843E-07            | <b>-6.78</b>     | <b>-11.92</b>    | <b>5.14</b>     | 0.14            | <b>0.44</b>     | 1.12              | -35.47 | <b>-12.18</b>    | 0.868            |
| BF184_23DHT24J_3-1                      | 1.22            | 1.334E+09            | 1.974E-03            | 3.907E-07            | <b>-7.37</b>     | <b>-12.29</b>    | <b>4.92</b>     | 0.19            | <b>0.46</b>     | 1.09              | -37.22 | <b>-12.77</b>    | 0.880            |
| BF184_23DHT24J_4-1                      | 1.21            | 1.273E+09            | 1.974E-03            | 3.418E-07            | <b>-7.68</b>     | <b>-12.19</b>    | <b>4.50</b>     | 0.17            | <b>0.45</b>     | 1.05              | -39.61 | <b>-13.08</b>    | 0.877            |
| BF184_23DHT24J_7-1                      | 1.21            | 1.285E+09            | 1.974E-03            | 2.985E-07            | <b>-7.44</b>     | <b>-13.02</b>    | <b>5.58</b>     | 0.15            | <b>0.44</b>     | 1.06              | -38.99 | <b>-12.84</b>    | 0.905            |
| BF184_23DHT24J_9-1                      | 1.21            | 1.290E+09            | 1.975E-03            | 3.173E-07            | <b>-7.19</b>     | <b>-12.67</b>    | <b>5.47</b>     | 0.16            | <b>0.44</b>     | 1.07              | -38.66 | <b>-12.59</b>    | 0.893            |
| BF184_23DHT24J_10-1                     | 1.21            | 1.279E+09            | 1.975E-03            | 3.381E-07            | <b>-7.14</b>     | <b>-12.09</b>    | <b>4.95</b>     | 0.17            | <b>0.45</b>     | 1.06              | -39.08 | <b>-12.54</b>    | 0.874            |
| BF184_23DHT24J_11-1                     | 1.21            | 1.352E+09            | 1.975E-03            | 2.946E-07            | <b>-6.92</b>     | <b>-12.70</b>    | <b>5.78</b>     | 0.15            | <b>0.44</b>     | 1.12              | -35.67 | <b>-12.32</b>    | 0.894            |
| BF184_23DHT24J_12-1                     | 1.26            | 1.300E+09            | 1.975E-03            | 2.563E-07            | <b>-7.10</b>     | <b>-12.52</b>    | <b>5.42</b>     | 0.13            | <b>0.43</b>     | 1.03              | -40.71 | <b>-12.50</b>    | 0.888            |
| BF184_23DHT24J_13-1                     | 1.25            | 1.296E+09            | 1.974E-03            | 3.449E-07            | <b>-7.30</b>     | <b>-12.65</b>    | <b>5.35</b>     | 0.17            | <b>0.45</b>     | 1.04              | -40.40 | <b>-12.70</b>    | 0.893            |
| BF184_23DHT24J_14-1                     | 1.24            | 1.288E+09            | 1.975E-03            | 2.445E-07            | <b>-7.27</b>     | <b>-12.48</b>    | <b>5.21</b>     | 0.12            | <b>0.43</b>     | 1.04              | -40.27 | <b>-12.67</b>    | 0.887            |
| BF184_23DHT24J_15-1                     | 1.23            | 1.295E+09            | 1.975E-03            | 3.981E-07            | <b>-7.24</b>     | <b>-11.81</b>    | <b>4.58</b>     | 0.20            | <b>0.46</b>     | 1.05              | -39.65 | <b>-12.64</b>    | 0.864            |
| BF184_23DHT24J_17-1                     | 1.23            | 1.267E+09            | 1.973E-03            | 3.889E-07            | <b>-7.82</b>     | <b>-12.69</b>    | <b>4.87</b>     | 0.19            | <b>0.46</b>     | 1.03              | -40.67 | <b>-13.22</b>    | 0.894            |
| BF184_23DHT24J_18-1                     | 1.22            | 1.261E+09            | 1.974E-03            | 3.826E-07            | <b>-7.39</b>     | <b>-12.67</b>    | <b>5.28</b>     | 0.19            | <b>0.46</b>     | 1.03              | -40.58 | <b>-12.79</b>    | 0.893            |
| BF184_23DHT24J_19-1                     | 1.22            | 1.342E+09            | 1.977E-03            | 3.347E-07            | <b>-6.26</b>     | <b>-12.06</b>    | <b>5.80</b>     | 0.17            | <b>0.45</b>     | 1.10              | -36.70 | <b>-11.66</b>    | 0.873            |
| 24MHP212A1: Mn-rich (n=20 out<br>of 21) |                 | 2.002E+09            | 1.990E-03            | 1.364E-06            | <b>0.73</b>      |                  | <b>0.80</b>     |                 | <b>0.68</b>     |                   |        | <b>-0.07</b>     | <b>0.86 0.53</b> |
| BF184_24MHP212A1_1-1                    | 1.21            | 2.042E+09            | 1.990E-03            | 2.101E-07            | <b>0.73</b>      | <b>0.00</b>      | <b>0.73</b>     | 0.10            | <b>0.43</b>     | 1.69              | -3.07  | <b>-0.07</b>     | 0.213            |
| BF184_24MHP212A1_1-2                    | 1.21            | 2.049E+09            | 1.991E-03            | 2.639E-07            | <b>1.10</b>      | <b>-0.05</b>     | <b>1.15</b>     | 0.13            | <b>0.43</b>     | 1.69              | -2.69  | <b>0.30</b>      | 0.219            |
| BF184_24MHP212A1_1-3                    | 1.21            | 2.047E+09            | 1.991E-03            | 2.168E-07            | <b>1.01</b>      | <b>0.02</b>      | <b>0.99</b>     | 0.11            | <b>0.43</b>     | 1.70              | -2.58  | <b>0.21</b>      | 0.210            |
| BF184_24MHP212A1_2-1                    | 1.20            | 2.035E+09            | 1.991E-03            | 2.682E-07            | <b>1.05</b>      | <b>0.06</b>      | <b>0.99</b>     | 0.13            | <b>0.43</b>     | 1.69              | -2.84  | <b>0.25</b>      | 0.205            |
| BF184_24MHP212A1_2-2                    | 1.20            | 2.027E+09            | 1.991E-03            | 2.167E-07            | <b>1.15</b>      | <b>0.01</b>      | <b>1.15</b>     | 0.11            | <b>0.43</b>     | 1.69              | -3.02  | <b>0.35</b>      | 0.212            |
| BF184_24MHP212A1_2-3                    | 1.20            | 2.028E+09            | 1.991E-03            | 2.279E-07            | <b>1.25</b>      | <b>0.02</b>      | <b>1.24</b>     | 0.11            | <b>0.43</b>     | 1.69              | -2.93  | <b>0.45</b>      | 0.211            |
| BF184_24MHP212A1_3-1                    | <del>1.20</del> | <del>1.938E+09</del> | <del>1.988E-03</del> | <del>3.495E-07</del> | <del>-0.37</del> | <del>-0.58</del> | <del>0.20</del> | <del>0.17</del> | <del>0.45</del> | outlier; rejected |        | <del>-1.17</del> | 0.278            |
| BF184_24MHP212A1_3-2                    | 1.20            | 2.000E+09            | 1.990E-03            | 2.697E-07            | <b>0.61</b>      | <b>-0.29</b>     | <b>0.90</b>     | 0.13            | <b>0.43</b>     | 1.67              | -4.12  | <b>-0.19</b>     | 0.248            |
| BF184_24MHP212A1_4-1                    | 1.20            | 2.026E+09            | 1.991E-03            | 2.402E-07            | <b>1.03</b>      | <b>0.05</b>      | <b>0.98</b>     | 0.12            | <b>0.43</b>     | 1.69              | -2.98  | <b>0.23</b>      | 0.206            |
| BF184_24MHP212A1_4-2                    | 1.20            | 2.018E+09            | 1.991E-03            | 2.109E-07            | <b>0.90</b>      | <b>0.04</b>      | <b>0.86</b>     | 0.11            | <b>0.43</b>     | 1.68              | -3.37  | <b>0.10</b>      | 0.208            |
| BF184_24MHP212A1_4-3                    | 1.20            | 2.013E+09            | 1.991E-03            | 3.069E-07            | <b>0.92</b>      | <b>0.03</b>      | <b>0.89</b>     | 0.15            | <b>0.44</b>     | 1.68              | -3.57  | <b>0.12</b>      | 0.209            |
| BF184_24MHP212A1_5-1                    | 1.20            | 2.001E+09            | 1.990E-03            | 1.922E-07            | <b>0.68</b>      | <b>-0.53</b>     | <b>1.21</b>     | 0.10            | <b>0.42</b>     | 1.67              | -4.03  | <b>-0.12</b>     | 0.273            |
| BF184_24MHP212A1_5-2                    | 1.20            | 1.981E+09            | 1.991E-03            | 1.621E-07            | <b>0.90</b>      | <b>-0.19</b>     | <b>1.09</b>     | 0.08            | <b>0.42</b>     | 1.66              | -4.87  | <b>0.10</b>      | 0.236            |
| BF184_24MHP212A1_5-3                    | 1.20            | 1.957E+09            | 1.989E-03            | 2.271E-07            | <b>0.13</b>      | <b>-0.32</b>     | <b>0.46</b>     | 0.11            | <b>0.43</b>     | 1.64              | -5.93  | <b>-0.67</b>     | 0.251            |

|                                   |      |           |           |           |              |              |             |      |                                 |      |        |              |       |
|-----------------------------------|------|-----------|-----------|-----------|--------------|--------------|-------------|------|---------------------------------|------|--------|--------------|-------|
| BF184_24MHP212A1_5-4              | 1.19 | 1.982E+09 | 1.990E-03 | 1.782E-07 | <b>0.62</b>  | <b>-0.24</b> | <b>0.86</b> | 0.09 | <b>0.42</b>                     | 1.66 | -4.67  | <b>-0.18</b> | 0.242 |
| BF184_24MHP212A1_5-5              | 1.19 | 1.978E+09 | 1.990E-03 | 2.403E-07 | <b>0.45</b>  | <b>-0.26</b> | <b>0.70</b> | 0.12 | <b>0.43</b>                     | 1.66 | -4.79  | <b>-0.35</b> | 0.244 |
| BF184_24MHP212A1_6-1              | 1.20 | 1.963E+09 | 1.989E-03 | 2.923E-07 | <b>-0.03</b> | <b>-0.57</b> | <b>0.54</b> | 0.15 | <b>0.44</b>                     | 1.64 | -5.59  | <b>-0.83</b> | 0.278 |
| BF184_24MHP212A1_6-2              | 1.19 | 1.957E+09 | 1.990E-03 | 2.465E-07 | <b>0.38</b>  | <b>-0.17</b> | <b>0.55</b> | 0.12 | <b>0.43</b>                     | 1.64 | -5.80  | <b>-0.42</b> | 0.233 |
| BF184_24MHP212A1_6-3              | 1.19 | 1.978E+09 | 1.990E-03 | 2.466E-07 | <b>0.62</b>  | <b>-0.18</b> | <b>0.80</b> | 0.12 | <b>0.43</b>                     | 1.66 | -4.75  | <b>-0.18</b> | 0.235 |
| BF184_24MHP212A1_6-4              | 1.19 | 1.978E+09 | 1.990E-03 | 2.221E-07 | <b>0.51</b>  | <b>-0.36</b> | <b>0.88</b> | 0.11 | <b>0.43</b>                     | 1.66 | -4.73  | <b>-0.29</b> | 0.256 |
| BF184_24MHP212A1_6-5              | 1.19 | 1.974E+09 | 1.990E-03 | 2.386E-07 | <b>0.51</b>  | <b>-0.27</b> | <b>0.78</b> | 0.12 | <b>0.43</b>                     | 1.66 | -4.72  | <b>-0.29</b> | 0.245 |
| 1 WHF1: Mn-rich (n=22)            |      | 2.084E+09 | 1.995E-03 | 1.561E-06 | <b>2.97</b>  |              | <b>2.31</b> |      | <b>0.78</b>                     |      |        | <b>0.66</b>  |       |
| BF184_WHF1_1-1                    | 1.17 | 2.129E+09 | 1.996E-03 | 2.835E-07 | <b>3.37</b>  | <b>0.91</b>  | <b>2.45</b> | 0.14 | <b>0.44</b>                     | 1.81 | 4.26   | <b>1.06</b>  | 0.017 |
| BF184_WHF1_1-2                    | 1.17 | 2.106E+09 | 1.995E-03 | 2.145E-07 | <b>3.23</b>  | <b>0.91</b>  | <b>2.32</b> | 0.11 | <b>0.43</b>                     | 1.80 | 3.26   | <b>0.92</b>  | 0.019 |
| BF184_WHF1_1-3                    | 1.17 | 2.116E+09 | 1.996E-03 | 2.896E-07 | <b>3.29</b>  | <b>0.92</b>  | <b>2.37</b> | 0.14 | <b>0.44</b>                     | 1.80 | 3.63   | <b>0.98</b>  | 0.014 |
| BF184_WHF1_2-1                    | 1.17 | 2.108E+09 | 1.996E-03 | 2.148E-07 | <b>3.32</b>  | <b>0.91</b>  | <b>2.41</b> | 0.11 | <b>0.43</b>                     | 1.80 | 3.35   | <b>1.01</b>  | 0.017 |
| BF184_WHF1_2-2                    | 1.17 | 2.090E+09 | 1.995E-03 | 2.788E-07 | <b>3.10</b>  | <b>0.82</b>  | <b>2.28</b> | 0.14 | <b>0.44</b>                     | 1.78 | 2.47   | <b>0.79</b>  | 0.058 |
| BF184_WHF1_2-3                    | 1.17 | 2.109E+09 | 1.995E-03 | 2.138E-07 | <b>3.02</b>  | <b>0.90</b>  | <b>2.12</b> | 0.11 | <b>0.43</b>                     | 1.80 | 3.35   | <b>0.71</b>  | 0.024 |
| BF184_WHF1_3-1                    | 1.17 | 2.119E+09 | 1.995E-03 | 2.044E-07 | <b>3.21</b>  | <b>0.92</b>  | <b>2.29</b> | 0.10 | <b>0.43</b>                     | 1.81 | 3.84   | <b>0.90</b>  | 0.013 |
| BF184_WHF1_3-2                    | 1.17 | 2.112E+09 | 1.995E-03 | 2.295E-07 | <b>3.25</b>  | <b>0.88</b>  | <b>2.37</b> | 0.11 | <b>0.43</b>                     | 1.80 | 3.60   | <b>0.94</b>  | 0.035 |
| BF184_WHF1_4-1                    | 1.17 | 2.057E+09 | 1.994E-03 | 2.196E-07 | <b>2.50</b>  | <b>0.77</b>  | <b>1.73</b> | 0.11 | <b>0.43</b>                     | 1.76 | 0.95   | <b>0.19</b>  | 0.074 |
| BF184_WHF1_4-2                    | 1.17 | 2.012E+09 | 1.994E-03 | 2.450E-07 | <b>2.38</b>  | <b>0.93</b>  | <b>1.45</b> | 0.12 | <b>0.43</b>                     | 1.72 | -1.26  | <b>0.07</b>  | 0.003 |
| BF184_WHF1_4-3                    | 1.17 | 2.110E+09 | 1.995E-03 | 2.251E-07 | <b>3.14</b>  | <b>0.83</b>  | <b>2.31</b> | 0.11 | <b>0.43</b>                     | 1.80 | 3.46   | <b>0.83</b>  | 0.057 |
| BF184_WHF1_5-1                    | 1.17 | 2.068E+09 | 1.994E-03 | 2.418E-07 | <b>2.76</b>  | <b>0.68</b>  | <b>2.08</b> | 0.12 | <b>0.43</b>                     | 1.76 | 1.44   | <b>0.45</b>  | 0.099 |
| BF184_WHF1_5-2                    | 1.17 | 2.025E+09 | 1.994E-03 | 2.398E-07 | <b>2.36</b>  | <b>0.38</b>  | <b>1.98</b> | 0.12 | <b>0.43</b>                     | 1.73 | -0.54  | <b>0.05</b>  | 0.157 |
| BF184_WHF1_5-3                    | 1.17 | 2.110E+09 | 1.995E-03 | 2.070E-07 | <b>2.98</b>  | <b>0.93</b>  | <b>2.05</b> | 0.10 | <b>0.43</b>                     | 1.81 | 3.78   | <b>0.67</b>  | 0.007 |
| BF184_WHF1_6-1                    | 1.17 | 2.037E+09 | 1.994E-03 | 3.055E-07 | <b>2.42</b>  | <b>0.50</b>  | <b>1.92</b> | 0.15 | <b>0.44</b>                     | 1.74 | 0.27   | <b>0.11</b>  | 0.136 |
| BF184_WHF1_6-2                    | 1.17 | 2.032E+09 | 1.994E-03 | 2.438E-07 | <b>2.41</b>  | <b>0.48</b>  | <b>1.92</b> | 0.12 | <b>0.43</b>                     | 1.74 | -0.14  | <b>0.10</b>  | 0.140 |
| BF184_WHF1_6-3                    | 1.17 | 2.033E+09 | 1.994E-03 | 2.455E-07 | <b>2.38</b>  | <b>0.64</b>  | <b>1.73</b> | 0.12 | <b>0.43</b>                     | 1.74 | 0.04   | <b>0.07</b>  | 0.107 |
| BF184_WHF1_7-1                    | 1.17 | 2.105E+09 | 1.995E-03 | 2.628E-07 | <b>3.16</b>  | <b>0.93</b>  | <b>2.23</b> | 0.13 | <b>0.43</b>                     | 1.80 | 3.48   | <b>0.85</b>  | 0.004 |
| BF184_WHF1_7-2                    | 1.17 | 2.100E+09 | 1.996E-03 | 2.459E-07 | <b>3.29</b>  | <b>0.93</b>  | <b>2.36</b> | 0.12 | <b>0.43</b>                     | 1.80 | 3.21   | <b>0.98</b>  | 0.003 |
| BF184_WHF1_7-3                    | 1.17 | 2.073E+09 | 1.995E-03 | 2.034E-07 | <b>2.91</b>  | <b>0.86</b>  | <b>2.06</b> | 0.10 | <b>0.43</b>                     | 1.78 | 2.04   | <b>0.60</b>  | 0.046 |
| BF184_WHF1_8-1                    | 1.17 | 2.101E+09 | 1.996E-03 | 3.010E-07 | <b>3.49</b>  | <b>0.93</b>  | <b>2.56</b> | 0.15 | <b>0.44</b>                     | 1.79 | 3.12   | <b>1.18</b>  | 0.002 |
| BF184_WHF1_8-2                    | 1.17 | 2.089E+09 | 1.996E-03 | 2.822E-07 | <b>3.45</b>  | <b>0.93</b>  | <b>2.52</b> | 0.14 | <b>0.44</b>                     | 1.79 | 2.81   | <b>1.14</b>  | 0.003 |
| 1 WHF11: Fe-rich (n=18 out of 20) |      | 1.466E+09 | 1.984E-03 | 1.769E-06 | <b>-2.37</b> |              | <b>4.70</b> |      | <b>0.88</b>                     |      |        | <b>-7.07</b> |       |
| BF184_WHF11_1-1                   | 1.14 | 1.473E+09 | 1.985E-03 | 6.448E-07 | <b>-2.11</b> | <b>-8.54</b> | <b>6.42</b> | 0.32 | <b>0.52</b> rejected (high XFe) |      |        | <b>-6.81</b> | 0.740 |
| BF184_WHF11_2-1                   | 1.14 | 1.478E+09 | 1.985E-03 | 3.146E-07 | <b>-2.06</b> | <b>-6.60</b> | <b>4.55</b> | 0.16 | <b>0.44</b>                     | 1.30 | -25.41 | <b>-6.76</b> | 0.657 |
| BF184_WHF11_2-2                   | 1.14 | 1.468E+09 | 1.984E-03 | 3.054E-07 | <b>-2.35</b> | <b>-6.83</b> | <b>4.48</b> | 0.15 | <b>0.44</b>                     | 1.29 | -25.92 | <b>-7.05</b> | 0.668 |
| BF184_WHF11_2-3                   | 1.14 | 1.520E+09 | 1.986E-03 | 3.793E-07 | <b>-1.65</b> | <b>-6.59</b> | <b>4.94</b> | 0.19 | <b>0.45</b>                     | 1.34 | -23.21 | <b>-6.35</b> | 0.656 |
| BF184_WHF11_3-1                   | 1.14 | 1.496E+09 | 1.985E-03 | 3.660E-07 | <b>-2.05</b> | <b>-7.00</b> | <b>4.94</b> | 0.18 | <b>0.45</b>                     | 1.31 | -24.46 | <b>-6.75</b> | 0.675 |
| BF184_WHF11_3-2                   | 1.14 | 1.479E+09 | 1.984E-03 | 4.665E-07 | <b>-2.39</b> | <b>-6.88</b> | <b>4.49</b> | 0.23 | <b>0.47</b>                     | 1.30 | -25.29 | <b>-7.09</b> | 0.670 |
| BF184_WHF11_3-3                   | 1.14 | 1.480E+09 | 1.985E-03 | 3.687E-07 | <b>-2.25</b> | <b>-6.68</b> | <b>4.44</b> | 0.18 | <b>0.45</b>                     | 1.30 | -25.17 | <b>-6.95</b> | 0.661 |
| BF184_WHF11_4-1                   | 1.14 | 1.512E+09 | 1.985E-03 | 4.425E-07 | <b>-2.04</b> | <b>-6.68</b> | <b>4.64</b> | 0.22 | <b>0.47</b>                     | 1.33 | -23.56 | <b>-6.74</b> | 0.661 |
| BF184_WHF11_4-2                   | 1.14 | 1.479E+09 | 1.984E-03 | 3.562E-07 | <b>-2.28</b> | <b>-7.24</b> | <b>4.96</b> | 0.18 | <b>0.45</b>                     | 1.30 | -25.23 | <b>-6.98</b> | 0.686 |
| BF184_WHF11_4-3                   | 1.14 | 1.484E+09 | 1.984E-03 | 3.727E-07 | <b>-2.41</b> | <b>-6.48</b> | <b>4.07</b> | 0.19 | <b>0.45</b>                     | 1.30 | -25.02 | <b>-7.11</b> | 0.652 |
| BF184_WHF11_5-1                   | 1.14 | 1.533E+09 | 1.986E-03 | 6.567E-07 | <b>-1.53</b> | <b>-5.80</b> | <b>4.28</b> | 0.33 | <b>0.53</b>                     | 1.35 | -22.59 | <b>-6.23</b> | 0.620 |
| BF184_WHF11_5-2                   | 1.14 | 1.444E+09 | 1.982E-03 | 3.259E-07 | <b>-3.60</b> | <b>-6.48</b> | <b>2.88</b> | 0.16 | <b>0.44</b> outlier; rejected   |      |        | <b>-8.30</b> | 0.652 |
| BF184_WHF11_5-3                   | 1.13 | 1.402E+09 | 1.983E-03 | 2.834E-07 | <b>-3.22</b> | <b>-7.93</b> | <b>4.71</b> | 0.14 | <b>0.44</b>                     | 1.24 | -29.02 | <b>-7.92</b> | 0.715 |
| BF184_WHF11_6-1                   | 1.13 | 1.474E+09 | 1.985E-03 | 3.130E-07 | <b>-2.06</b> | <b>-6.27</b> | <b>4.22</b> | 0.16 | <b>0.44</b>                     | 1.30 | -25.26 | <b>-6.76</b> | 0.642 |
| BF184_WHF11_6-2                   | 1.13 | 1.427E+09 | 1.984E-03 | 2.646E-07 | <b>-2.68</b> | <b>-7.11</b> | <b>4.43</b> | 0.13 | <b>0.43</b>                     | 1.26 | -27.76 | <b>-7.38</b> | 0.680 |

2.16 0.57

4.45 0.60

|   |                       |      |           |           |           |       |        |      |      |               |      |        |        |       |           |
|---|-----------------------|------|-----------|-----------|-----------|-------|--------|------|------|---------------|------|--------|--------|-------|-----------|
|   | BF184_WHF11_7-1       | 1.13 | 1.457E+09 | 1.984E-03 | 3.075E-07 | -2.41 | -6.45  | 4.04 | 0.15 | 0.44          | 1.29 | -26.12 | -7.11  | 0.650 |           |
|   | BF184_WHF11_7-2       | 1.13 | 1.420E+09 | 1.983E-03 | 3.261E-07 | -2.92 | -7.03  | 4.11 | 0.16 | 0.44          | 1.25 | -27.96 | -7.62  | 0.677 |           |
|   | BF184_WHF11_7-3       | 1.13 | 1.413E+09 | 1.983E-03 | 3.086E-07 | -2.99 | -7.11  | 4.11 | 0.15 | 0.44          | 1.25 | -28.43 | -7.69  | 0.680 |           |
|   | BF184_WHF11_8-1       | 1.13 | 1.437E+09 | 1.984E-03 | 3.463E-07 | -2.68 | -6.92  | 4.24 | 0.17 | 0.45          | 1.27 | -27.18 | -7.38  | 0.672 |           |
|   | BF184_WHF11_8-2       | 1.13 | 1.432E+09 | 1.984E-03 | 2.788E-07 | -2.67 | -7.16  | 4.48 | 0.14 | 0.44          | 1.26 | -27.46 | -7.37  | 0.682 |           |
| 1 | WHF12: Fe-rich (n=10) |      | 1.482E+09 | 1.985E-03 | 1.563E-06 | -2.09 |        | 4.74 |      | 0.78          |      |        |        | -6.83 | 4.85 0.51 |
|   | BF184_WHF12_1-1       | 1.12 | 1.441E+09 | 1.984E-03 | 3.126E-07 | -2.33 | -7.12  | 4.79 | 0.16 | 0.44          | 1.28 | -26.35 | -7.07  | 0.680 |           |
|   | BF184_WHF12_1-2       | 1.13 | 1.481E+09 | 1.985E-03 | 5.566E-07 | -2.17 | -7.08  | 4.91 | 0.28 | 0.50          | 1.32 | -24.41 | -6.91  | 0.678 |           |
|   | BF184_WHF12_2-1       | 1.12 | 1.513E+09 | 1.986E-03 | 2.846E-07 | -1.69 | -6.14  | 4.45 | 0.14 | 0.44          | 1.35 | -22.66 | -6.43  | 0.636 |           |
|   | BF184_WHF12_2-2       | 1.12 | 1.537E+09 | 1.986E-03 | 2.914E-07 | -1.40 | -6.16  | 4.76 | 0.15 | 0.44          | 1.37 | -21.38 | -6.14  | 0.637 |           |
|   | BF184_WHF12_3-1       | 1.12 | 1.482E+09 | 1.985E-03 | 5.578E-07 | -1.81 | -6.86  | 5.05 | 0.28 | 0.50          | 1.32 | -24.10 | -6.55  | 0.669 |           |
|   | BF184_WHF12_3-2       | 1.12 | 1.485E+09 | 1.985E-03 | 3.595E-07 | -1.82 | -7.14  | 5.32 | 0.18 | 0.45          | 1.32 | -24.10 | -6.56  | 0.681 |           |
|   | BF184_WHF12_4-1       | 1.12 | 1.466E+09 | 1.984E-03 | 3.012E-07 | -2.44 | -7.56  | 5.11 | 0.15 | 0.44          | 1.30 | -25.06 | -7.18  | 0.699 |           |
|   | BF184_WHF12_4-2       | 1.12 | 1.478E+09 | 1.985E-03 | 3.401E-07 | -2.19 | -7.00  | 4.81 | 0.17 | 0.45          | 1.32 | -24.33 | -6.93  | 0.675 |           |
|   | BF184_WHF12_5-1       | 1.12 | 1.469E+09 | 1.984E-03 | 3.622E-07 | -2.64 | -7.24  | 4.60 | 0.18 | 0.45          | 1.31 | -24.77 | -7.38  | 0.686 |           |
|   | BF184_WHF12_5-2       | 1.12 | 1.473E+09 | 1.984E-03 | 2.672E-07 | -2.41 | -7.10  | 4.69 | 0.13 | 0.43          | 1.31 | -24.60 | -7.15  | 0.680 |           |
| 1 | WHF2: Mn-rich (n=21)  |      | 2.088E+09 | 1.995E-03 | 6.379E-07 | 2.84  |        | 1.61 |      | 0.32          |      |        |        | 1.23  | 1.90 0.32 |
|   | BF184_WHF2_1-1        | 1.16 | 2.094E+09 | 1.994E-03 | 2.026E-07 | 2.74  | 0.93   | 1.80 | 0.10 | 0.43          | 1.81 | 3.98   | 1.13   | 0.002 |           |
|   | BF184_WHF2_1-2        | 1.16 | 2.099E+09 | 1.995E-03 | 2.112E-07 | 3.02  | 0.93   | 2.08 | 0.11 | 0.43          | 1.81 | 4.15   | 1.41   | 0.002 |           |
|   | BF184_WHF2_1-3        | 1.16 | 2.103E+09 | 1.995E-03 | 2.268E-07 | 3.10  | 0.93   | 2.17 | 0.11 | 0.43          | 1.82 | 4.33   | 1.49   | 0.001 |           |
|   | BF184_WHF2_2-1        | 1.16 | 2.095E+09 | 1.995E-03 | 2.878E-07 | 2.94  | 0.93   | 2.01 | 0.14 | 0.44          | 1.81 | 4.04   | 1.33   | 0.003 |           |
|   | BF184_WHF2_2-2        | 1.16 | 2.099E+09 | 1.995E-03 | 3.338E-07 | 2.80  | 0.93   | 1.86 | 0.17 | 0.45          | 1.82 | 4.33   | 1.19   | 0.002 |           |
|   | BF184_WHF2_2-3        | 1.16 | 2.098E+09 | 1.995E-03 | 2.083E-07 | 2.83  | 0.93   | 1.90 | 0.10 | 0.43          | 1.81 | 4.23   | 1.22   | 0.002 |           |
|   | BF184_WHF2_3-1        | 1.16 | 2.098E+09 | 1.995E-03 | 2.584E-07 | 3.01  | 0.93   | 2.08 | 0.13 | 0.43          | 1.82 | 4.37   | 1.40   | 0.003 |           |
|   | BF184_WHF2_3-2        | 1.16 | 2.092E+09 | 1.995E-03 | 2.578E-07 | 2.79  | 0.93   | 1.86 | 0.13 | 0.43          | 1.81 | 3.93   | 1.18   | 0.002 |           |
|   | BF184_WHF2_3-3        | 1.16 | 2.091E+09 | 1.995E-03 | 2.879E-07 | 3.19  | 0.93   | 2.26 | 0.14 | 0.44          | 1.81 | 3.92   | 1.58   | 0.001 |           |
|   | BF184_WHF2_4-1        | 1.16 | 2.094E+09 | 1.994E-03 | 3.072E-07 | 2.63  | 0.93   | 1.69 | 0.15 | 0.44          | 1.81 | 4.00   | 1.02   | 0.001 |           |
|   | BF184_WHF2_4-2        | 1.16 | 2.088E+09 | 1.995E-03 | 2.394E-07 | 2.86  | 0.93   | 1.93 | 0.12 | 0.43          | 1.81 | 3.76   | 1.25   | 0.001 |           |
|   | BF184_WHF2_4-3        | 1.16 | 2.088E+09 | 1.995E-03 | 2.319E-07 | 2.85  | 0.93   | 1.92 | 0.12 | 0.43          | 1.81 | 3.76   | 1.24   | 0.002 |           |
|   | BF184_WHF2_5-1        | 1.16 | 2.091E+09 | 1.994E-03 | 2.300E-07 | 2.77  | 0.93   | 1.83 | 0.11 | 0.43          | 1.81 | 3.93   | 1.16   | 0.001 |           |
|   | BF184_WHF2_5-2        | 1.16 | 2.085E+09 | 1.994E-03 | 2.590E-07 | 2.68  | 0.93   | 1.74 | 0.13 | 0.43          | 1.80 | 3.49   | 1.07   | 0.001 |           |
|   | BF184_WHF2_5-3        | 1.16 | 2.087E+09 | 1.994E-03 | 2.531E-07 | 2.76  | 0.93   | 1.83 | 0.13 | 0.43          | 1.80 | 3.61   | 1.15   | 0.003 |           |
|   | BF184_WHF2_6-1        | 1.16 | 2.074E+09 | 1.995E-03 | 2.569E-07 | 2.81  | 0.93   | 1.88 | 0.13 | 0.43          | 1.79 | 3.07   | 1.20   | 0.002 |           |
|   | BF184_WHF2_6-2        | 1.16 | 2.081E+09 | 1.994E-03 | 2.648E-07 | 2.70  | 0.93   | 1.77 | 0.13 | 0.43          | 1.80 | 3.44   | 1.09   | 0.003 |           |
|   | BF184_WHF2_6-3        | 1.16 | 2.073E+09 | 1.995E-03 | 2.741E-07 | 3.04  | 0.93   | 2.11 | 0.14 | 0.44          | 1.79 | 3.01   | 1.43   | 0.002 |           |
|   | BF184_WHF2_7-1        | 1.16 | 2.076E+09 | 1.994E-03 | 2.590E-07 | 2.75  | 0.93   | 1.82 | 0.13 | 0.43          | 1.80 | 3.23   | 1.14   | 0.001 |           |
|   | BF184_WHF2_7-2        | 1.16 | 2.071E+09 | 1.994E-03 | 2.064E-07 | 2.58  | 0.93   | 1.65 | 0.10 | 0.43          | 1.79 | 2.94   | 0.97   | 0.001 |           |
|   | BF184_WHF2_7-3        | 1.16 | 2.066E+09 | 1.994E-03 | 2.349E-07 | 2.70  | 0.93   | 1.76 | 0.12 | 0.43          | 1.79 | 2.77   | 1.09   | 0.003 |           |
| 1 | WHF3: Fe-rich (n=17)  |      | 1.323E+09 | 1.974E-03 | 5.998E-06 | -7.30 |        | 2.38 |      | 2.99          |      |        |        | -9.68 | 4.06 3.58 |
|   | BF184_WHF3_1-1        | 1.14 | 1.292E+09 | 1.972E-03 | 3.591E-07 | -8.53 | -12.13 | 3.60 | 0.18 | 0.45          | 1.13 | -35.13 | -10.91 | 0.875 |           |
|   | BF184_WHF3_1-2        | 1.15 | 1.333E+09 | 1.973E-03 | 3.122E-07 | -7.98 | -10.12 | 2.14 | 0.16 | 0.44          | 1.16 | -33.14 | -10.36 | 0.802 |           |
|   | BF184_WHF3_2-1        | 1.14 | 1.274E+09 | 1.970E-03 | 3.478E-07 | -9.72 | -12.67 | 2.95 | 0.17 | 0.45          | 1.11 | -35.95 | -12.10 | 0.893 |           |
|   | BF184_WHF3_3-1        | 1.14 | 1.353E+09 | 1.973E-03 | 3.825E-07 | -7.82 | -10.22 | 2.40 | 0.19 | 0.46          | 1.18 | -32.01 | -10.20 | 0.806 |           |
|   | BF184_WHF3_3-2        | 1.14 | 1.305E+09 | 1.978E-03 | 5.993E-07 | -5.65 | -11.75 | 6.11 | 0.30 | 0.51 outlier? | 1.14 | -34.45 | -8.03  | 0.862 |           |
|   | BF184_WHF3_3-3        | 1.22 | 1.438E+09 | 1.974E-03 | 3.095E-07 | -7.67 | -10.02 | 2.34 | 0.15 | 0.44          | 1.17 | -32.51 | -10.05 | 0.798 |           |

|                               |                 |                      |                      |                      |                  |                  |             |                 |             |        |        |               |                  |
|-------------------------------|-----------------|----------------------|----------------------|----------------------|------------------|------------------|-------------|-----------------|-------------|--------|--------|---------------|------------------|
| BF184_WHF3_4-1                | 1.20            | 1.409E+09            | 1.974E-03            | 3.159E-07            | <b>-7.66</b>     | <b>-11.77</b>    | <b>4.12</b> | 0.16            | <b>0.44</b> | 1.17   | -32.60 | <b>-10.04</b> | 0.862            |
| BF184_WHF3_4-2                | 1.19            | 1.343E+09            | 1.972E-03            | 3.466E-07            | <b>-8.70</b>     | <b>-11.41</b>    | <b>2.71</b> | 0.17            | <b>0.45</b> | 1.13   | -34.92 | <b>-11.08</b> | 0.850            |
| BF184_WHF3_5-1                | 1.18            | 1.355E+09            | 1.975E-03            | 2.611E-07            | <b>-7.28</b>     | <b>-11.40</b>    | <b>4.13</b> | 0.13            | <b>0.43</b> | 1.15   | -33.80 | <b>-9.66</b>  | 0.849            |
| BF184_WHF3_5-2                | 1.17            | 1.293E+09            | 1.971E-03            | 2.757E-07            | <b>-9.23</b>     | <b>-10.86</b>    | <b>1.62</b> | 0.14            | <b>0.44</b> | 1.10   | -36.51 | <b>-11.61</b> | 0.830            |
| BF184_WHF3_5-3                | 1.16            | 1.321E+09            | 1.978E-03            | 3.209E-07            | <b>-5.70</b>     | <b>-11.68</b>    | <b>5.98</b> | 0.16            | <b>0.44</b> | 1.14   | -34.62 | <b>-8.08</b>  | 0.859            |
| BF184_WHF3_6-1                | 1.16            | 1.315E+09            | 1.977E-03            | 3.231E-07            | <b>-5.86</b>     | <b>-11.71</b>    | <b>5.85</b> | 0.16            | <b>0.44</b> | 1.13   | -34.80 | <b>-8.24</b>  | 0.860            |
| BF184_WHF3_6-2                | 1.16            | 1.310E+09            | 1.978E-03            | 2.849E-07            | <b>-5.46</b>     | <b>-11.79</b>    | <b>6.32</b> | 0.14            | <b>0.44</b> | 1.13   | -34.96 | <b>-7.84</b>  | 0.863            |
| BF184_WHF3_6-3                | 1.16            | 1.306E+09            | 1.977E-03            | 3.101E-07            | <b>-5.80</b>     | <b>-11.63</b>    | <b>5.83</b> | 0.15            | <b>0.44</b> | 1.13   | -35.03 | <b>-8.18</b>  | 0.857            |
| BF184_WHF3_7-1                | 1.15            | 1.307E+09            | 1.978E-03            | 3.424E-07            | <b>-5.58</b>     | <b>-11.54</b>    | <b>5.96</b> | 0.17            | <b>0.45</b> | 1.13   | -34.92 | <b>-7.96</b>  | 0.854            |
| BF184_WHF3_7-2                | 1.15            | 1.287E+09            | 1.977E-03            | 4.266E-07            | <b>-6.05</b>     | <b>-11.66</b>    | <b>5.61</b> | 0.21            | <b>0.46</b> | 1.12   | -35.80 | <b>-8.43</b>  | 0.859            |
| BF184_WHF3_7-3                | 1.15            | 1.257E+09            | 1.970E-03            | 3.695E-07            | <b>-9.48</b>     | <b>-10.83</b>    | <b>1.35</b> | 0.18            | <b>0.45</b> | 1.09   | -37.27 | <b>-11.86</b> | 0.829            |
| <b>BF186</b>                  |                 |                      |                      |                      |                  |                  |             |                 |             |        |        |               |                  |
| 24MHP12B wolframite (average, |                 |                      |                      |                      |                  |                  |             |                 |             |        |        |               |                  |
| 1 n=17 out of 20)             |                 | 1.875E+09            | 1.991E-03            | 1.012E-06            | <b>1.11</b>      |                  | <b>1.11</b> |                 | <b>0.50</b> | 1.7566 |        |               | <b>0.60 0.39</b> |
| BF186_24MHP12B_1-1            | <del>1.12</del> | <del>1.679E+09</del> | <del>1.983E-03</del> | <del>2.785E-07</del> | <del>-3.12</del> | <del>-3.40</del> |             | <del>0.14</del> | <b>0.52</b> |        |        |               | 0.491            |
| BF186_24MHP12B_1-2            | <del>1.05</del> | <del>1.618E+09</del> | <del>1.984E-03</del> | <del>2.208E-07</del> | <del>-2.59</del> |                  |             | <del>0.11</del> | <b>0.52</b> |        |        |               |                  |
| BF186_24MHP12B_1-3            | <del>1.04</del> | <del>1.614E+09</del> | <del>1.984E-03</del> | <del>2.889E-07</del> | <del>-2.45</del> |                  |             | <del>0.14</del> | <b>0.52</b> |        |        |               |                  |
| BF186_24MHP12B_2-1            | 1.12            | 1.902E+09            | 1.990E-03            | 3.036E-07            | <b>0.69</b>      | <b>0.22</b>      | <b>0.47</b> | 0.15            | <b>0.53</b> | 1.70   | -3.03  | <b>-0.42</b>  | 0.183            |
| BF186_24MHP12B_2-2            | 1.05            | 1.850E+09            | 1.991E-03            | 2.216E-07            | <b>1.21</b>      |                  |             | 0.11            | <b>0.52</b> | 1.76   | 0.21   | <b>0.10</b>   |                  |
| BF186_24MHP12B_2-3            | 1.06            | 1.873E+09            | 1.991E-03            | 3.568E-07            | <b>1.26</b>      |                  |             | 0.18            | <b>0.53</b> | 1.77   | 0.48   | <b>0.15</b>   |                  |
| BF186_24MHP12B_3-1            | 1.11            | 1.898E+09            | 1.990E-03            | 2.526E-07            | <b>0.60</b>      | <b>0.19</b>      | <b>0.41</b> | 0.13            | <b>0.52</b> | 1.72   | -2.36  | <b>-0.51</b>  | 0.187            |
| BF186_24MHP12B_3-2            | 1.06            | 1.867E+09            | 1.991E-03            | 2.529E-07            | <b>0.92</b>      |                  |             | 0.13            | <b>0.52</b> | 1.76   | -0.07  | <b>-0.19</b>  |                  |
| BF186_24MHP12B_3-3            | 1.04            | 1.810E+09            | 1.990E-03            | 1.967E-07            | <b>0.77</b>      |                  |             | 0.10            | <b>0.51</b> | 1.74   | -0.71  | <b>-0.34</b>  |                  |
| BF186_24MHP12B_4-1            | 1.09            | 1.921E+09            | 1.991E-03            | 2.313E-07            | <b>0.99</b>      | <b>0.42</b>      | <b>0.58</b> | 0.12            | <b>0.52</b> | 1.76   | 0.15   | <b>-0.12</b>  | 0.152            |
| BF186_24MHP12B_4-2            | 1.07            | 1.862E+09            | 1.991E-03            | 2.294E-07            | <b>0.98</b>      |                  |             | 0.11            | <b>0.52</b> | 1.75   | -0.46  | <b>-0.13</b>  |                  |
| BF186_24MHP12B_4-3            | 1.04            | 1.820E+09            | 1.991E-03            | 2.660E-07            | <b>1.15</b>      |                  |             | 0.13            | <b>0.52</b> | 1.76   | 0.00   | <b>0.04</b>   |                  |
| BF186_24MHP12B_4-4            | 1.02            | 1.792E+09            | 1.991E-03            | 3.326E-07            | <b>1.25</b>      |                  |             | 0.17            | <b>0.53</b> | 1.75   | -0.35  | <b>0.14</b>   |                  |
| BF186_24MHP12B_5-1            | 1.18            | 2.048E+09            | 1.991E-03            | 2.348E-07            | <b>1.31</b>      | <b>0.39</b>      | <b>0.92</b> | 0.12            | <b>0.52</b> | 1.73   | -1.51  | <b>0.20</b>   | 0.156            |
| BF186_24MHP12B_5-2            | 1.07            | 1.894E+09            | 1.991E-03            | 2.321E-07            | <b>1.16</b>      |                  |             | 0.12            | <b>0.52</b> | 1.77   | 0.66   | <b>0.05</b>   |                  |
| BF186_24MHP12B_5-3            | 1.03            | 1.830E+09            | 1.992E-03            | 2.427E-07            | <b>1.47</b>      |                  |             | 0.12            | <b>0.52</b> | 1.78   | 1.32   | <b>0.36</b>   |                  |
| BF186_24MHP12B_6-1            | 1.09            | 1.926E+09            | 1.991E-03            | 2.518E-07            | <b>1.06</b>      | <b>0.42</b>      | <b>0.63</b> | 0.13            | <b>0.52</b> | 1.77   | 0.78   | <b>-0.05</b>  | 0.150            |
| BF186_24MHP12B_6-2            | 1.08            | 1.931E+09            | 1.991E-03            | 1.937E-07            | <b>1.27</b>      |                  |             | 0.10            | <b>0.51</b> | 1.79   | 2.18   | <b>0.16</b>   |                  |
| BF186_24MHP12B_6-3            | 1.03            | 1.829E+09            | 1.992E-03            | 2.953E-07            | <b>1.44</b>      |                  |             | 0.15            | <b>0.53</b> | 1.78   | 1.31   | <b>0.33</b>   |                  |
| BF186_24MHP12B_6-4            | 1.02            | 1.823E+09            | 1.992E-03            | 2.736E-07            | <b>1.34</b>      |                  |             | 0.14            | <b>0.52</b> | 1.78   | 1.36   | <b>0.23</b>   |                  |
| 23DHT24J wolframite (average, |                 |                      |                      |                      |                  |                  |             |                 |             |        |        |               |                  |
| 1 n=33)                       |                 | 1.219E+09            | 1.976E-03            | 1.086E-06            | <b>-6.68</b>     |                  | <b>5.40</b> |                 | <b>0.54</b> |        |        | <b>-12.08</b> | <b>5.72 0.71</b> |
| BF186_23DHT24J_1              | 1.10            | 1.215E+09            | 1.974E-03            | 3.232E-07            | <b>-7.27</b>     | <b>-12.70</b>    | <b>5.44</b> | 0.16            | <b>0.53</b> | 1.10   | -37.20 | <b>-12.67</b> | 0.895            |
| BF186_23DHT24J_1-2            | 1.07            | 1.234E+09            | 1.975E-03            | 4.644E-07            | <b>-6.77</b>     |                  |             | 0.23            | <b>0.56</b> | 1.15   | -34.51 | <b>-12.17</b> |                  |
| BF186_23DHT24J_1-3            | 1.06            | 1.223E+09            | 1.976E-03            | 3.187E-07            | <b>-6.64</b>     |                  |             | 0.16            | <b>0.53</b> | 1.15   | -34.30 | <b>-12.04</b> |                  |
| BF186_23DHT24J_1-4            | 1.05            | 1.210E+09            | 1.975E-03            | 3.479E-07            | <b>-6.81</b>     |                  |             | 0.17            | <b>0.53</b> | 1.15   | -34.36 | <b>-12.21</b> |                  |
| BF186_23DHT24J_1-5            | 1.04            | 1.189E+09            | 1.975E-03            | 4.544E-07            | <b>-6.79</b>     |                  |             | 0.23            | <b>0.55</b> | 1.14   | -35.19 | <b>-12.19</b> |                  |
| BF186_23DHT24J_1-6            | 1.05            | 1.211E+09            | 1.976E-03            | 2.758E-07            | <b>-6.61</b>     |                  |             | 0.14            | <b>0.52</b> | 1.16   | -34.14 | <b>-12.01</b> |                  |
| BF186_23DHT24J_1-7            | 1.04            | 1.192E+09            | 1.975E-03            | 3.588E-07            | <b>-6.73</b>     |                  |             | 0.18            | <b>0.54</b> | 1.15   | -34.47 | <b>-12.13</b> |                  |
| BF186_23DHT24J_1-8            | 1.03            | 1.159E+09            | 1.975E-03            | 3.436E-07            | <b>-7.12</b>     |                  |             | 0.17            | <b>0.53</b> | 1.13   | -35.81 | <b>-12.52</b> |                  |
| BF186_23DHT24J_2              | 1.10            | 1.217E+09            | 1.975E-03            | 3.020E-07            | <b>-7.15</b>     | <b>-12.50</b>    | <b>5.35</b> | 0.15            | <b>0.53</b> | 1.11   | -36.85 | <b>-12.55</b> | 0.888            |
| BF186_23DHT24J_3              | 1.09            | 1.253E+09            | 1.976E-03            | 2.648E-07            | <b>-6.69</b>     | <b>-12.46</b>    | <b>5.77</b> | 0.13            | <b>0.52</b> | 1.15   | -34.65 | <b>-12.09</b> | 0.886            |

|                               |      |           |           |           |       |        |      |      |      |        |        |        |           |
|-------------------------------|------|-----------|-----------|-----------|-------|--------|------|------|------|--------|--------|--------|-----------|
| BF186_23DHT24J_4              | 1.09 | 1.247E+09 | 1.976E-03 | 3.580E-07 | -6.62 | -12.29 | 5.68 | 0.18 | 0.54 | 1.14   | -34.84 | -12.02 | 0.881     |
| BF186_23DHT24J_4-2            | 1.07 | 1.247E+09 | 1.976E-03 | 4.286E-07 | -6.54 |        |      | 0.21 | 0.55 | 1.16   | -33.88 | -11.94 |           |
| BF186_23DHT24J_4-3            | 1.06 | 1.230E+09 | 1.976E-03 | 3.354E-07 | -6.52 |        |      | 0.17 | 0.53 | 1.16   | -34.11 | -11.92 |           |
| BF186_23DHT24J_4-4            | 1.05 | 1.222E+09 | 1.976E-03 | 3.643E-07 | -6.55 |        |      | 0.18 | 0.54 | 1.16   | -33.96 | -11.95 |           |
| BF186_23DHT24J_4-5            | 1.05 | 1.208E+09 | 1.976E-03 | 3.435E-07 | -6.54 |        |      | 0.17 | 0.53 | 1.15   | -34.27 | -11.94 |           |
| BF186_23DHT24J_4-6            | 1.06 | 1.219E+09 | 1.976E-03 | 3.930E-07 | -6.58 |        |      | 0.20 | 0.54 | 1.15   | -34.53 | -11.98 |           |
| BF186_23DHT24J_4-7            | 1.04 | 1.206E+09 | 1.976E-03 | 4.230E-07 | -6.48 |        |      | 0.21 | 0.55 | 1.16   | -33.81 | -11.88 |           |
| BF186_23DHT24J_4-8            | 1.03 | 1.197E+09 | 1.976E-03 | 3.458E-07 | -6.35 |        |      | 0.17 | 0.53 | 1.16   | -33.92 | -11.75 |           |
| BF186_23DHT24J_4-9            | 1.02 | 1.155E+09 | 1.975E-03 | 4.660E-07 | -6.84 |        |      | 0.23 | 0.56 | 1.13   | -35.83 | -12.24 |           |
| BF186_23DHT24J_5              | 1.16 | 1.298E+09 | 1.975E-03 | 4.037E-07 | -6.72 | -12.83 | 6.11 | 0.20 | 0.54 | 1.12   | -36.20 | -12.12 | 0.899     |
| BF186_23DHT24J_6              | 1.10 | 1.223E+09 | 1.974E-03 | 3.335E-07 | -7.41 | -12.61 | 5.20 | 0.17 | 0.53 | 1.11   | -36.73 | -12.81 | 0.891     |
| BF186_23DHT24J_7              | 1.09 | 1.237E+09 | 1.976E-03 | 1.059E-06 | -6.67 | -12.90 | 6.23 | 0.53 | 0.73 | 1.14   | -35.33 | -12.07 | 0.901     |
| BF186_23DHT24J_8              | 1.08 | 1.263E+09 | 1.976E-03 | 3.692E-07 | -6.32 | -12.35 | 6.02 | 0.18 | 0.54 | 1.17   | -33.49 | -11.72 | 0.882     |
| BF186_23DHT24J_8-2            | 1.07 | 1.239E+09 | 1.976E-03 | 3.997E-07 | -6.37 |        |      | 0.20 | 0.54 | 1.16   | -33.93 | -11.77 |           |
| BF186_23DHT24J_8-3            | 1.06 | 1.231E+09 | 1.976E-03 | 3.761E-07 | -6.55 |        |      | 0.19 | 0.54 | 1.16   | -34.17 | -11.95 |           |
| BF186_23DHT24J_8-4            | 1.06 | 1.217E+09 | 1.976E-03 | 3.224E-07 | -6.66 |        |      | 0.16 | 0.53 | 1.15   | -34.52 | -12.06 |           |
| BF186_23DHT24J_8-5            | 1.05 | 1.223E+09 | 1.976E-03 | 2.186E-07 | -6.45 |        |      | 0.11 | 0.52 | 1.17   | -33.62 | -11.85 |           |
| BF186_23DHT24J_8-6            | 1.15 | 1.290E+09 | 1.976E-03 | 2.831E-07 | -6.64 |        |      | 0.14 | 0.52 | 1.13   | -35.90 | -12.04 |           |
| BF186_23DHT24J_8-7            | 1.04 | 1.216E+09 | 1.976E-03 | 3.497E-07 | -6.38 |        |      | 0.17 | 0.53 | 1.16   | -33.68 | -11.78 |           |
| BF186_23DHT24J_8-8            | 1.04 | 1.195E+09 | 1.975E-03 | 4.037E-07 | -6.75 |        |      | 0.20 | 0.54 | 1.15   | -34.27 | -12.15 |           |
| BF186_23DHT24J_8-10           | 1.03 | 1.195E+09 | 1.976E-03 | 3.200E-07 | -6.23 |        |      | 0.16 | 0.53 | 1.17   | -33.66 | -11.63 |           |
| BF186_23DHT24J_8-9            | 1.03 | 1.169E+09 | 1.976E-03 | 3.615E-07 | -6.65 |        |      | 0.18 | 0.54 | 1.14   | -35.20 | -12.05 |           |
| BF186_23DHT24J_9              | 1.08 | 1.207E+09 | 1.975E-03 | 3.081E-07 | -7.10 | -12.80 | 5.70 | 0.15 | 0.53 | 1.12   | -36.28 | -12.50 | 0.898     |
| <b>BF191</b>                  |      |           |           |           |       |        |      |      |      |        |        |        |           |
| 24MHP12B wolframite (average, |      |           |           |           |       |        |      |      |      |        |        |        |           |
| 1 n=4 out of 6)               |      | 1.825E+09 | 1.991E-03 | 8.180E-07 | 1.11  |        | 1.11 |      | 0.41 | 1.7758 |        |        | 0.80 0.35 |
| BF191_24MHP12B_1-1            | 1.03 | 1.592E+09 | 1.984E-03 | 2.702E-07 | -2.60 | -3.52  |      | 0.13 | 0.43 |        |        |        | 0.498     |
| BF191_24MHP12B_3-1            | 1.03 | 1.829E+09 | 1.992E-03 | 2.928E-07 | 1.26  | 0.43   | 0.83 | 0.15 | 0.43 | 1.77   | -0.05  | 0.15   | 0.148     |
| BF191_24MHP12B_9-1            | 1.03 | 1.828E+09 | 1.992E-03 | 2.482E-07 | 1.28  | 0.24   | 1.03 | 0.12 | 0.43 | 1.78   | 0.08   | 0.17   | 0.179     |
| BF191_24MHP12B_10-1           | 1.03 | 1.823E+09 | 1.991E-03 | 2.016E-07 | 0.84  | 0.19   | 0.65 | 0.10 | 0.42 | 1.77   | -0.05  | -0.27  | 0.187     |
| BF191_24MHP12B_12-1           | 1.03 | 1.822E+09 | 1.991E-03 | 2.102E-07 | 1.06  | 0.36   | 0.70 | 0.10 | 0.42 | 1.78   | 0.03   | -0.05  | 0.161     |
| BF191_24MHP12B_13-1           | 1.07 | 1.871E+09 | 1.991E-03 | 3.048E-07 | 0.93  | -1.54  | 2.47 | 0.15 | 0.44 |        |        | -0.18  | 0.364     |
| 23DHT24J wolframite (average, |      |           |           |           |       |        |      |      |      |        |        |        |           |
| 1 n=5)                        |      | 1.193E+09 | 1.976E-03 | 5.695E-07 | -6.90 |        | 5.40 |      | 0.28 |        |        | -12.30 | 5.62 0.20 |
| BF191_23DHT24J_1              | 1.03 | 1.174E+09 | 1.975E-03 | 4.585E-07 | -7.00 | -12.53 | 5.53 | 0.23 | 0.47 | 1.14   | -36.08 | -12.40 | 0.889     |
| BF191_23DHT24J_2-1            | 1.03 | 1.184E+09 | 1.975E-03 | 3.732E-07 | -6.92 | -12.67 | 5.75 | 0.19 | 0.45 | 1.15   | -35.42 | -12.32 | 0.893     |
| BF191_23DHT24J_2-2            | 1.03 | 1.177E+09 | 1.975E-03 | 3.613E-07 | -7.06 | -12.61 | 5.55 | 0.18 | 0.45 | 1.14   | -35.64 | -12.46 | 0.892     |
| BF191_23DHT24J_3-1            | 1.03 | 1.193E+09 | 1.976E-03 | 3.991E-07 | -6.78 | -10.73 | 3.95 | 0.20 | 0.45 |        |        | -12.18 | 0.825     |
| BF191_23DHT24J_3-2            | 1.08 | 1.239E+09 | 1.976E-03 | 3.491E-07 | -6.73 | -12.39 | 5.66 | 0.17 | 0.44 | 1.15   | -35.47 | -12.13 | 0.884     |
| 24MHP889 wolframite (average, |      |           |           |           |       |        |      |      |      |        |        |        |           |
| 1 n=16 out of 18)             |      | 1.524E+09 | 1.982E-03 | 5.398E-06 | -3.45 |        | 1.76 |      | 2.69 |        |        | -5.21  | 1.32 0.89 |
| BF191_24MHP889_wrm1-1         | 1.03 | 1.453E+09 | 1.981E-03 | 3.513E-07 | -4.30 | -5.79  | 1.50 | 0.18 | 0.44 | 1.41   | -20.54 | -6.06  | 0.619     |
| BF191_24MHP889_wrm1-2         | 1.03 | 1.438E+09 | 1.980E-03 | 2.671E-07 | -4.41 | -5.39  | 0.98 | 0.13 | 0.43 | 1.40   | -21.39 | -6.17  | 0.599     |
| BF191_24MHP889_wrm2-1         | 1.03 | 1.402E+09 | 1.979E-03 | 3.127E-07 | -5.21 | -7.20  | 1.99 | 0.16 | 0.44 | 1.36   | -23.20 | -6.97  | 0.684     |
| BF191_24MHP889_wrm2-2         | 1.03 | 1.427E+09 | 1.980E-03 | 2.937E-07 | -4.77 | -5.58  | 0.81 | 0.15 | 0.43 | 1.39   | -21.95 | -6.53  | 0.609     |

|                                  |                 |                      |                      |                      |                   |                  |                  |                 |                 |                                  |        |               |                  |
|----------------------------------|-----------------|----------------------|----------------------|----------------------|-------------------|------------------|------------------|-----------------|-----------------|----------------------------------|--------|---------------|------------------|
| BF191_24MHP889_wrm3-1            | 1.03            | 1.540E+09            | 1.983E-03            | 3.227E-07            | <b>-3.14</b>      | <b>-5.32</b>     | <b>2.18</b>      | 0.16            | <b>0.44</b>     | 1.50                             | -15.63 | <b>-4.90</b>  | 0.596            |
| <del>BF191_24MHP889_wrm3-2</del> | <del>1.02</del> | <del>1.677E+09</del> | <del>1.987E-03</del> | <del>3.223E-07</del> | <del>-0.97</del>  | <del>-3.94</del> | <del>2.97</del>  | <del>0.16</del> | <del>0.44</del> | outlier; rejected                |        |               | 0.523            |
| BF191_24MHP889_wrm4-1            | 1.03            | 1.635E+09            | 1.986E-03            | 2.421E-07            | <b>-1.58</b>      | <b>-2.95</b>     | <b>1.37</b>      | 0.12            | <b>0.43</b>     | 1.59                             | -10.59 | <b>-3.34</b>  | 0.463            |
| BF191_24MHP889_wrm4-2            | 1.03            | 1.572E+09            | 1.984E-03            | 2.983E-07            | <b>-2.65</b>      | <b>-4.49</b>     | <b>1.83</b>      | 0.15            | <b>0.43</b>     | 1.53                             | -13.89 | <b>-4.41</b>  | 0.553            |
| BF191_24MHP889_wrm5-1            | 1.03            | 1.482E+09            | 1.982E-03            | 3.086E-07            | <b>-3.72</b>      | <b>-4.97</b>     | <b>1.24</b>      | 0.15            | <b>0.44</b>     | 1.44                             | -18.64 | <b>-5.48</b>  | 0.578            |
| BF191_24MHP889_wrm5-2            | 1.03            | 1.634E+09            | 1.987E-03            | 2.717E-07            | <b>-1.33</b>      | <b>-2.07</b>     | <b>0.75</b>      | 0.14            | <b>0.43</b>     | 1.59                             | -10.44 | <b>-3.09</b>  | 0.404            |
| BF191_24MHP889_wrm5B-1           | 1.03            | 1.444E+09            | 1.980E-03            | 3.338E-07            | <b>-4.65</b>      | <b>-5.98</b>     | <b>1.34</b>      | 0.17            | <b>0.44</b>     | 1.41                             | -20.82 | <b>-6.41</b>  | 0.628            |
| BF191_24MHP889_wrm6-1            | 1.03            | 1.582E+09            | 1.985E-03            | 3.096E-07            | <b>-2.31</b>      | <b>-3.84</b>     | <b>1.53</b>      | 0.15            | <b>0.44</b>     | 1.54                             | -13.23 | <b>-4.07</b>  | 0.517            |
| <del>BF191_24MHP889_wrm6-2</del> | <del>1.03</del> | <del>1.504E+09</del> | <del>1.982E-03</del> | <del>2.907E-07</del> | <del>-3.68</del>  | <del>-3.59</del> | <del>-0.08</del> | <del>0.14</del> | <del>0.43</del> | outlier; rejected                |        |               | 0.503            |
| BF191_24MHP889_wrm7-1            | 1.03            | 1.585E+09            | 1.985E-03            | 2.685E-07            | <b>-2.08</b>      | <b>-3.43</b>     | <b>1.35</b>      | 0.13            | <b>0.43</b>     | 1.54                             | -13.10 | <b>-3.84</b>  | 0.493            |
| BF191_24MHP889_wrm7-2            | 1.03            | 1.500E+09            | 1.982E-03            | 3.166E-07            | <b>-3.51</b>      | <b>-4.08</b>     | <b>0.57</b>      | 0.16            | <b>0.44</b>     | 1.46                             | -17.69 | <b>-5.27</b>  | 0.531            |
| BF191_24MHP889_wrm8-1            | 1.03            | 1.519E+09            | 1.978E-03            | 3.980E-07            | <b>-5.39</b>      | <b>-6.87</b>     | <b>1.48</b>      | 0.20            | <b>0.45</b>     | 1.48                             | -16.65 | <b>-7.15</b>  | 0.669            |
| BF191_24MHP889_wrm8-2            | 1.13            | 1.550E+09            | 1.980E-03            | 2.939E-07            | <b>-4.40</b>      | <b>-5.34</b>     | <b>0.94</b>      | 0.15            | <b>0.43</b>     | 1.37                             | -22.82 | <b>-6.16</b>  | 0.597            |
| BF191_24MHP889_wrm8-3            | 1.03            | 1.622E+09            | 1.986E-03            | 2.478E-07            | <b>-1.71</b>      | <b>-2.98</b>     | <b>1.28</b>      | 0.12            | <b>0.43</b>     | 1.57                             | -11.61 | <b>-3.47</b>  | 0.465            |
| <del>BF191_24MHP889_wrm9-1</del> | <del>1.10</del> | <del>1.966E+07</del> | <del>1.924E-03</del> | <del>1.474E-05</del> | <del>-32.99</del> | <del>-5.64</del> |                  | <del>7.35</del> | <del>7.36</del> | very high CPS, not wrm; rejected |        |               | 0.612            |
| <b>BF163</b>                     |                 |                      |                      |                      |                   |                  |                  |                 |                 |                                  |        |               |                  |
| 24MHP12B wolframite (average,    |                 |                      |                      |                      |                   |                  |                  |                 |                 |                                  |        |               |                  |
| 1 n=7)                           |                 | 1.457E+09            | 1.991E-03            | 4.166E-07            | <b>1.11</b>       |                  | <b>1.11</b>      |                 | <b>0.21</b>     | 1.8453                           |        |               | <b>0.80 0.15</b> |
| BF163_24MHP12B_wrm1-1            | 0.79            | 1.450E+09            | 1.990E-03            | 3.053E-07            | <b>0.99</b>       | <b>0.16</b>      | <b>0.83</b>      | 0.15            | <b>0.26</b>     | 1.85                             | 0.00   | <b>-0.12</b>  | 0.191            |
| BF163_24MHP12B_wrm1-2            | 0.79            | 1.437E+09            | 1.991E-03            | 3.032E-07            | <b>1.06</b>       |                  |                  | 0.15            | <b>0.26</b>     | 1.82                             | -1.21  | <b>-0.05</b>  |                  |
| BF163_24MHP12B_wrm2-1            | 0.79            | 1.467E+09            | 1.991E-03            | 3.232E-07            | <b>1.20</b>       | <b>0.43</b>      | <b>0.76</b>      | 0.16            | <b>0.26</b>     | 1.87                             | 1.17   | <b>0.09</b>   | 0.148            |
| BF163_24MHP12B_wrm3-1            | 0.78            | 1.455E+09            | 1.991E-03            | 2.805E-07            | <b>1.11</b>       | <b>0.38</b>      | <b>0.72</b>      | 0.14            | <b>0.25</b>     | 1.85                             | 0.51   | <b>0.00</b>   | 0.157            |
| BF163_24MHP12B_wrm3-2            | 0.79            | 1.460E+09            | 1.991E-03            | 3.416E-07            | <b>1.01</b>       |                  |                  | 0.17            | <b>0.27</b>     | 1.84                             | -0.16  | <b>-0.10</b>  |                  |
| BF163_24MHP12B_wrm3-3            | 0.79            | 1.458E+09            | 1.991E-03            | 2.548E-07            | <b>1.12</b>       |                  |                  | 0.13            | <b>0.24</b>     | 1.85                             | 0.47   | <b>0.01</b>   |                  |
| BF163_24MHP12B_wrm4-1            | 0.80            | 1.471E+09            | 1.991E-03            | 2.971E-07            | <b>1.29</b>       | <b>0.39</b>      | <b>0.90</b>      | 0.15            | <b>0.26</b>     | 1.83                             | -0.80  | <b>0.18</b>   | 0.156            |
| 23DHT24J wolframite (average,    |                 |                      |                      |                      |                   |                  |                  |                 |                 |                                  |        |               |                  |
| 1 n=4)                           |                 | 9.244E+08            | 1.974E-03            | 4.462E-07            | <b>-7.19</b>      |                  | <b>5.40</b>      |                 | <b>0.22</b>     |                                  |        | <b>-12.59</b> | <b>5.59 0.63</b> |
| BF163_23DHT24J_wrm1              | 0.79            | 9.316E+08            | 1.975E-03            | 4.772E-07            | <b>-7.03</b>      | <b>-13.09</b>    | <b>6.06</b>      | 0.24            | <b>0.32</b>     | 1.18                             | -36.17 | <b>-12.43</b> | 0.908            |
| BF163_23DHT24J_wrm2              | 0.79            | 9.223E+08            | 1.974E-03            | 3.584E-07            | <b>-7.19</b>      | <b>-12.58</b>    | <b>5.38</b>      | 0.18            | <b>0.27</b>     | 1.17                             | -36.74 | <b>-12.59</b> | 0.890            |
| BF163_23DHT24J_wrm3              | 0.79            | 9.214E+08            | 1.974E-03            | 4.309E-07            | <b>-7.24</b>      | <b>-12.68</b>    | <b>5.44</b>      | 0.21            | <b>0.30</b>     | 1.16                             | -36.88 | <b>-12.64</b> | 0.894            |
| BF163_23DHT24J_wrm4              | 0.79            | 9.221E+08            | 1.974E-03            | 4.496E-07            | <b>-7.29</b>      | <b>-12.78</b>    | <b>5.49</b>      | 0.22            | <b>0.31</b>     | 1.17                             | -36.85 | <b>-12.69</b> | 0.897            |
| 24MHP43 wolframite (average,     |                 |                      |                      |                      |                   |                  |                  |                 |                 |                                  |        |               |                  |
| 1 n=21 out of 23)                |                 | 1.163E+09            | 1.979E-03            | 3.694E-06            | <b>-4.63</b>      |                  | <b>2.50</b>      |                 | <b>1.84</b>     |                                  |        | <b>-7.13</b>  | <b>0.97 0.68</b> |
| BF163_24MHP43_Wrm1               | 0.79            | 1.171E+09            | 1.979E-03            | 3.543E-07            | <b>-4.77</b>      | <b>-5.17</b>     | <b>0.41</b>      | 0.18            | <b>0.27</b>     | 1.49                             | -19.32 | <b>-7.27</b>  | 0.589            |
| BF163_24MHP43_Wrm2               | 0.78            | 1.083E+09            | 1.976E-03            | 2.879E-07            | <b>-6.33</b>      | <b>-6.97</b>     | <b>0.65</b>      | 0.14            | <b>0.25</b>     | 1.38                             | -25.15 | <b>-8.83</b>  | 0.674            |
| BF163_24MHP43_Wrm3               | 0.79            | 1.191E+09            | 1.981E-03            | 3.071E-07            | <b>-3.65</b>      | <b>-4.61</b>     | <b>0.96</b>      | 0.15            | <b>0.26</b>     | 1.52                             | -17.82 | <b>-6.15</b>  | 0.559            |
| BF163_24MHP43_Wrm4               | 0.79            | 1.140E+09            | 1.979E-03            | 3.438E-07            | <b>-4.98</b>      | <b>-6.05</b>     | <b>1.07</b>      | 0.17            | <b>0.27</b>     | 1.45                             | -21.43 | <b>-7.48</b>  | 0.631            |
| BF163_24MHP43_Wrm5               | 0.79            | 1.202E+09            | 1.981E-03            | 3.732E-07            | <b>-3.69</b>      | <b>-4.54</b>     | <b>0.85</b>      | 0.19            | <b>0.28</b>     | 1.53                             | -17.12 | <b>-6.19</b>  | 0.556            |
| BF163_24MHP43_Wrm6               | 0.79            | 1.167E+09            | 1.980E-03            | 3.751E-07            | <b>-4.49</b>      | <b>-5.51</b>     | <b>1.01</b>      | 0.19            | <b>0.28</b>     | 1.48                             | -19.62 | <b>-6.99</b>  | 0.605            |
| BF163_24MHP43_Wrm7               | 0.79            | 1.075E+09            | 1.976E-03            | 3.964E-07            | <b>-6.12</b>      | <b>-7.49</b>     | <b>1.37</b>      | 0.20            | <b>0.29</b>     | 1.37                             | -25.87 | <b>-8.62</b>  | 0.697            |
| BF163_24MHP43_Wrm9               | 0.79            | 1.110E+09            | 1.977E-03            | 3.147E-07            | <b>-5.75</b>      | <b>-6.24</b>     | <b>0.50</b>      | 0.16            | <b>0.26</b>     | 1.41                             | -23.63 | <b>-8.25</b>  | 0.641            |
| BF163_24MHP43_Wrm10              | 0.79            | 1.140E+09            | 1.978E-03            | 3.541E-07            | <b>-5.15</b>      | <b>-5.87</b>     | <b>0.72</b>      | 0.18            | <b>0.27</b>     | 1.45                             | -21.66 | <b>-7.65</b>  | 0.623            |
| <del>BF163_24MHP43_Wrm11</del>   | <del>0.79</del> | <del>1.190E+09</del> | <del>1.980E-03</del> | <del>3.791E-07</del> | <del>-4.39</del>  | <del>-4.33</del> | <del>-0.06</del> | <del>0.19</del> | <del>0.28</del> | outlier; rejected?               |        |               | 0.544            |
| BF163_24MHP43_Wrm12              | 0.79            | 1.141E+09            | 1.978E-03            | 3.167E-07            | <b>-5.05</b>      | <b>-5.93</b>     | <b>0.88</b>      | 0.16            | <b>0.26</b>     | 1.45                             | -21.51 | <b>-7.55</b>  | 0.626            |
| BF163_24MHP43_Wrm13              | 0.79            | 1.214E+09            | 1.982E-03            | 2.685E-07            | <b>-3.47</b>      | <b>-4.43</b>     | <b>0.96</b>      | 0.13            | <b>0.25</b>     | 1.54                             | -16.65 | <b>-5.97</b>  | 0.550            |

|                       |      |                      |                      |                      |                         |                         |                        |                 |                        |                    |        |              |       |
|-----------------------|------|----------------------|----------------------|----------------------|-------------------------|-------------------------|------------------------|-----------------|------------------------|--------------------|--------|--------------|-------|
| BF163_24MHP43_Wrm14   | 0.79 | 1.223E+09            | 1.982E-03            | 3.482E-07            | <b>-3.26</b>            | <b>-5.03</b>            | <b>1.77</b>            | 0.17            | <b>0.27</b>            | 1.55               | -16.05 | <b>-5.76</b> | 0.581 |
| BF163_24MHP43_Wrm22   | 0.79 | 1.188E+09            | 1.980E-03            | 3.394E-07            | <b>-4.04</b>            | <b>-5.02</b>            | <b>0.97</b>            | 0.17            | <b>0.27</b>            | 1.51               | -18.05 | <b>-6.54</b> | 0.581 |
| BF163_24MHP43_Wrm23   | 0.81 | 1.111E+09            | 1.977E-03            | 4.111E-07            | <b>-5.84</b>            | <b>-6.81</b>            | <b>0.97</b>            | 0.21            | <b>0.29</b>            | 1.37               | -25.59 | <b>-8.34</b> | 0.667 |
| BF163_24MHP43_Wrm24   | 0.80 | 1.205E+09            | 1.979E-03            | 3.630E-07            | <b>-4.54</b>            | <b>-6.15</b>            | <b>1.62</b>            | 0.18            | <b>0.28</b>            | 1.51               | -18.41 | <b>-7.04</b> | 0.636 |
| BF163_24MHP43_Wrm26   | 0.80 | 1.147E+09            | 1.978E-03            | 3.227E-07            | <b>-5.09</b>            | <b>-6.21</b>            | <b>1.12</b>            | 0.16            | <b>0.26</b>            | 1.43               | -22.24 | <b>-7.59</b> | 0.639 |
| BF163_24MHP43_Wrm27-1 | 0.80 | 1.206E+09            | 1.981E-03            | 3.069E-07            | <b>-3.86</b>            | <b>-5.08</b>            | <b>1.22</b>            | 0.15            | <b>0.26</b>            | 1.51               | -18.12 | <b>-6.36</b> | 0.584 |
| BF163_24MHP43_Wrm27-2 | 0.80 | 1.227E+09            | 1.982E-03            | 3.868E-07            | <b>-3.53</b>            | <b>-4.21</b>            | <b>0.69</b>            | 0.19            | <b>0.28</b>            | 1.54               | -16.58 | <b>-6.03</b> | 0.538 |
| BF163_24MHP43_Wrm29-1 | 0.80 | <del>1.129E+09</del> | <del>1.978E-03</del> | <del>3.640E-07</del> | <del><b>-5.45</b></del> | <del><b>-7.87</b></del> | <del><b>2.42</b></del> | <del>0.18</del> | <del><b>0.28</b></del> | outlier; rejected? |        |              | 0.713 |
| BF163_24MHP43_Wrm29-2 | 0.79 | 1.125E+09            | 1.978E-03            | 3.497E-07            | <b>-5.26</b>            | <b>-6.30</b>            | <b>1.05</b>            | 0.17            | <b>0.27</b>            | 1.41               | -23.33 | <b>-7.76</b> | 0.644 |
| BF163_24MHP43_Wrm30   | 0.80 | 1.212E+09            | 1.981E-03            | 3.430E-07            | <b>-3.63</b>            | <b>-4.18</b>            | <b>0.56</b>            | 0.17            | <b>0.27</b>            | 1.52               | -17.52 | <b>-6.13</b> | 0.536 |
| BF163_24MHP43_Wrm31   | 0.80 | 1.147E+09            | 1.979E-03            | 2.839E-07            | <b>-4.76</b>            | <b>-5.88</b>            | <b>1.13</b>            | 0.14            | <b>0.25</b>            | 1.44               | -21.83 | <b>-7.26</b> | 0.624 |

**BF210**  
24MHP12B wolframite (average,  
1 n=24)

|                     |      |           |           |           |             |             |             |      |             |        |       |              |             |             |
|---------------------|------|-----------|-----------|-----------|-------------|-------------|-------------|------|-------------|--------|-------|--------------|-------------|-------------|
| BF210_24MHP12B_1-1  | 0.95 | 1.637E+09 | 1.990E-03 | 1.192E-06 | <b>1.11</b> |             | <b>1.11</b> |      | <b>0.59</b> | 1.7419 |       |              | <b>0.67</b> | <b>0.50</b> |
| BF210_24MHP12B_1-2  | 0.95 | 1.641E+09 | 1.990E-03 | 3.241E-07 | <b>0.65</b> | <b>0.06</b> | <b>0.59</b> | 0.16 | <b>0.62</b> | 1.73   | -0.66 | <b>-0.46</b> | 0.204       |             |
| BF210_24MHP12B_3-1  | 0.96 | 1.651E+09 | 1.991E-03 | 2.926E-07 | <b>1.21</b> | <b>0.48</b> | <b>0.73</b> | 0.15 | <b>0.61</b> | 1.73   | -0.82 | <b>0.10</b>  | 0.141       |             |
| BF210_24MHP12B_3-2  | 0.95 | 1.664E+09 | 1.990E-03 | 3.115E-07 | <b>1.03</b> |             |             | 0.16 | <b>0.61</b> | 1.76   | 0.96  | <b>-0.08</b> |             |             |
| BF210_24MHP12B_4-1  | 0.94 | 1.648E+09 | 1.990E-03 | 3.405E-07 | <b>0.97</b> | <b>0.41</b> | <b>0.56</b> | 0.17 | <b>0.62</b> | 1.75   | 0.52  | <b>-0.14</b> | 0.153       |             |
| BF210_24MHP12B_4-2  | 0.94 | 1.657E+09 | 1.991E-03 | 2.947E-07 | <b>1.22</b> |             |             | 0.15 | <b>0.61</b> | 1.76   | 1.20  | <b>0.11</b>  |             |             |
| BF210_24MHP12B_5-1  | 0.94 | 1.626E+09 | 1.989E-03 | 3.666E-07 | <b>0.59</b> | <b>0.19</b> | <b>0.39</b> | 0.18 | <b>0.62</b> | 1.73   | -0.51 | <b>-0.52</b> | 0.187       |             |
| BF210_24MHP12B_5-2  | 0.94 | 1.604E+09 | 1.989E-03 | 3.111E-07 | <b>0.49</b> |             |             | 0.16 | <b>0.61</b> | 1.71   | -2.00 | <b>-0.62</b> |             |             |
| BF210_24MHP12B_6-1  | 0.94 | 1.628E+09 | 1.990E-03 | 2.927E-07 | <b>1.09</b> | <b>0.20</b> | <b>0.89</b> | 0.15 | <b>0.61</b> | 1.74   | -0.21 | <b>-0.02</b> | 0.186       |             |
| BF210_24MHP12B_7-1  | 0.94 | 1.636E+09 | 1.991E-03 | 3.211E-07 | <b>1.26</b> | <b>0.23</b> | <b>1.04</b> | 0.16 | <b>0.62</b> | 1.75   | 0.40  | <b>0.15</b>  | 0.181       |             |
| BF210_24MHP12B_7-2  | 0.94 | 1.628E+09 | 1.991E-03 | 2.298E-07 | <b>1.24</b> |             |             | 0.11 | <b>0.61</b> | 1.74   | -0.15 | <b>0.13</b>  |             |             |
| BF210_24MHP12B_8-1  | 0.94 | 1.614E+09 | 1.990E-03 | 3.062E-07 | <b>1.09</b> | <b>0.28</b> | <b>0.81</b> | 0.15 | <b>0.61</b> | 1.73   | -0.91 | <b>-0.02</b> | 0.174       |             |
| BF210_24MHP12B_8-2  | 0.93 | 1.605E+09 | 1.991E-03 | 3.079E-07 | <b>1.18</b> |             |             | 0.15 | <b>0.61</b> | 1.72   | -1.40 | <b>0.07</b>  |             |             |
| BF210_24MHP12B_9-1  | 0.93 | 1.590E+09 | 1.990E-03 | 3.545E-07 | <b>0.63</b> | <b>0.32</b> | <b>0.31</b> | 0.18 | <b>0.62</b> | 1.70   | -2.30 | <b>-0.48</b> | 0.167       |             |
| BF210_24MHP12B_9-2  | 0.93 | 1.617E+09 | 1.991E-03 | 2.853E-07 | <b>1.15</b> |             |             | 0.14 | <b>0.61</b> | 1.73   | -0.52 | <b>0.04</b>  |             |             |
| BF210_24MHP12B_13-1 | 0.93 | 1.620E+09 | 1.990E-03 | 3.241E-07 | <b>0.99</b> |             |             | 0.16 | <b>0.62</b> | 1.74   | -0.20 | <b>-0.12</b> |             |             |
| BF210_24MHP12B_14-1 | 0.93 | 1.628E+09 | 1.991E-03 | 2.539E-07 | <b>1.33</b> |             |             | 0.13 | <b>0.61</b> | 1.75   | 0.39  | <b>0.22</b>  |             |             |
| BF210_24MHP12B_14-2 | 0.98 | 1.696E+09 | 1.991E-03 | 2.603E-07 | <b>1.54</b> |             |             | 0.13 | <b>0.61</b> | 1.74   | -0.18 | <b>0.43</b>  |             |             |
| BF210_24MHP12B_15-1 | 0.95 | 1.662E+09 | 1.990E-03 | 2.574E-07 | <b>1.11</b> |             |             | 0.13 | <b>0.61</b> | 1.76   | 0.85  | <b>0.00</b>  |             |             |
| BF210_24MHP12B_15-2 | 0.94 | 1.641E+09 | 1.990E-03 | 2.870E-07 | <b>1.07</b> |             |             | 0.14 | <b>0.61</b> | 1.75   | 0.37  | <b>-0.04</b> |             |             |
| BF210_24MHP12B_16-1 | 0.94 | 1.669E+09 | 1.991E-03 | 2.537E-07 | <b>1.32</b> |             |             | 0.13 | <b>0.61</b> | 1.78   | 2.40  | <b>0.21</b>  |             |             |
| BF210_24MHP12B_16-2 | 0.94 | 1.659E+09 | 1.991E-03 | 3.436E-07 | <b>1.43</b> |             |             | 0.17 | <b>0.62</b> | 1.77   | 1.76  | <b>0.32</b>  |             |             |
| BF210_24MHP12B_1-3  | 0.93 | 1.630E+09 | 1.991E-03 | 2.680E-07 | <b>1.54</b> |             |             | 0.13 | <b>0.61</b> | 1.75   | 0.23  | <b>0.43</b>  |             |             |
| BF210_24MHP12B_3-3  | 0.93 | 1.637E+09 | 1.991E-03 | 2.645E-07 | <b>1.61</b> |             |             | 0.13 | <b>0.61</b> | 1.76   | 1.07  | <b>0.50</b>  |             |             |

23DHT24J wolframite (average,  
1 n=10)

|                   |      |           |           |           |              |               |             |      |             |      |        |               |       |             |             |
|-------------------|------|-----------|-----------|-----------|--------------|---------------|-------------|------|-------------|------|--------|---------------|-------|-------------|-------------|
| BF210_23DHT-24J_1 | 0.93 | 1.044E+09 | 1.974E-03 | 1.843E-06 | <b>-7.07</b> |               | <b>5.40</b> |      | <b>0.92</b> |      |        | <b>-12.47</b> |       | <b>5.19</b> | <b>0.95</b> |
| BF210_23DHT-24J_2 | 0.93 | 1.054E+09 | 1.974E-03 | 4.298E-07 | <b>-7.03</b> | <b>-11.03</b> | <b>4.00</b> | 0.21 | <b>0.63</b> | 1.13 | -35.13 | <b>-12.43</b> | 0.836 |             |             |
| BF210_23DHT-24J_3 | 0.93 | 1.052E+09 | 1.974E-03 | 4.180E-07 | <b>-7.15</b> | <b>-12.19</b> | <b>5.04</b> | 0.21 | <b>0.63</b> | 1.13 | -35.17 | <b>-12.55</b> | 0.877 |             |             |
| BF210_23DHT-24J_4 | 0.93 | 1.024E+09 | 1.974E-03 | 5.244E-07 | <b>-7.21</b> | <b>-12.75</b> | <b>5.54</b> | 0.26 | <b>0.65</b> | 1.10 | -36.90 | <b>-12.61</b> | 0.896 |             |             |
| BF210_23DHT-24J_5 | 0.93 | 1.056E+09 | 1.975E-03 | 4.666E-07 | <b>-6.44</b> | <b>-11.65</b> | <b>5.20</b> | 0.23 | <b>0.64</b> | 1.13 | -34.90 | <b>-11.84</b> | 0.858 |             |             |
| BF210_23DHT-24J_8 | 0.93 | 1.021E+09 | 1.973E-03 | 5.005E-07 | <b>-7.68</b> | <b>-12.61</b> | <b>4.93</b> | 0.25 | <b>0.64</b> | 1.10 | -36.99 | <b>-13.08</b> | 0.891 |             |             |
| BF210_23DHT-24J_8 | 0.93 | 1.069E+09 | 1.975E-03 | 3.598E-07 | <b>-6.46</b> | <b>-11.86</b> | <b>5.40</b> | 0.18 | <b>0.62</b> | 1.15 | -34.16 | <b>-11.86</b> | 0.866 |             |             |

|                                |                 |                      |                      |                      |                         |                         |              |                 |                        |                                 |        |               |                    |
|--------------------------------|-----------------|----------------------|----------------------|----------------------|-------------------------|-------------------------|--------------|-----------------|------------------------|---------------------------------|--------|---------------|--------------------|
| BF210_23DHT-24J_9              | 0.93            | 1.044E+09            | 1.974E-03            | 4.219E-07            | <b>-7.17</b>            | <b>-12.60</b>           | <b>5.43</b>  | 0.21            | <b>0.63</b>            | 1.12                            | -35.67 | <b>-12.57</b> | 0.891              |
| BF210_23DHT-24J_10             | 0.93            | 1.015E+09            | 1.973E-03            | 4.412E-07            | <b>-7.75</b>            | <b>-13.07</b>           | <b>5.32</b>  | 0.22            | <b>0.63</b>            | 1.09                            | -37.23 | <b>-13.15</b> | 0.907              |
| BF210_23DHT-24J_11             | 0.93            | 1.038E+09            | 1.974E-03            | 5.232E-07            | <b>-7.28</b>            | <b>-12.65</b>           | <b>5.37</b>  | 0.26            | <b>0.65</b>            | 1.12                            | -35.98 | <b>-12.68</b> | 0.893              |
| BF210_23DHT-24J_12             | 0.93            | 1.066E+09            | 1.975E-03            | 4.094E-07            | <b>-6.57</b>            | <b>-12.25</b>           | <b>5.68</b>  | 0.20            | <b>0.63</b>            | 1.15                            | -34.21 | <b>-11.97</b> | 0.879              |
| 24MHP212A&B wolframite         |                 |                      |                      |                      |                         |                         |              |                 |                        |                                 |        |               |                    |
| 1 (average, n=27 out of 30)    |                 | 1.608E+09            | 1.990E-03            | 8.994E-07            | <b>0.75</b>             |                         | <b>0.80</b>  |                 | <b>0.45</b>            | homogeneous?                    |        | <b>-0.05</b>  | <b>0.82 0.42</b>   |
| BF210_24MHP212A_1-1            | 0.94            | 1.608E+09            | 1.990E-03            | 2.824E-07            | <b>0.81</b>             | <b>0.00</b>             | <b>0.38</b>  | 0.14            | <b>0.61</b>            | outlier; rejected               |        | <b>0.01</b>   | 0.212              |
| BF210_24MHP212A_2-1            | 0.94            | 1.622E+09            | 1.990E-03            | 3.050E-07            | <b>0.98</b>             | <b>0.15</b>             | <b>0.83</b>  | 0.15            | <b>0.61</b>            |                                 | 1.72   | -1.00         | <b>0.18</b> 0.192  |
| BF210_24MHP212A_2-2            | 0.94            | 1.617E+09            | 1.990E-03            | 3.076E-07            | <b>0.87</b>             | <b>0.17</b>             | <b>0.70</b>  | 0.15            | <b>0.61</b>            |                                 | 1.72   | -1.19         | <b>0.07</b> 0.190  |
| BF210_24MHP212A_3-1            | 0.94            | 1.594E+09            | 1.989E-03            | 3.112E-07            | <b>0.58</b>             | <b>-0.25</b>            | <b>0.83</b>  | 0.16            | <b>0.61</b>            |                                 | 1.70   | -2.59         | <b>-0.22</b> 0.243 |
| BF210_24MHP212A_4-1            | 0.94            | 1.600E+09            | 1.989E-03            | 3.523E-07            | <b>0.50</b>             | <b>-0.14</b>            | <b>0.64</b>  | 0.18            | <b>0.62</b>            |                                 | 1.70   | -2.12         | <b>-0.30</b> 0.230 |
| BF210_24MHP212A_5-1            | 0.94            | 1.594E+09            | 1.989E-03            | 3.287E-07            | <b>0.44</b>             | <b>-0.18</b>            | <b>0.62</b>  | 0.16            | <b>0.62</b>            | zoned?                          | 1.70   | -2.34         | <b>-0.36</b> 0.234 |
| <del>BF210_24MHP212A_5-2</del> | <del>0.94</del> | <del>1.558E+09</del> | <del>1.988E-03</del> | <del>4.179E-07</del> | <del><b>-0.34</b></del> | <del><b>-0.17</b></del> |              | <del>0.21</del> | <del><b>0.63</b></del> | low CPS, outlier; rejected      |        |               | 0.234              |
| BF210_24MHP212A_6-1            | 0.94            | 1.622E+09            | 1.990E-03            | 2.964E-07            | <b>0.85</b>             | <b>0.11</b>             | <b>0.73</b>  | 0.15            | <b>0.61</b>            |                                 | 1.73   | -0.88         | <b>0.05</b> 0.198  |
| BF210_24MHP212A_7-1            | 0.94            | 1.614E+09            | 1.990E-03            | 3.200E-07            | <b>0.73</b>             | <b>0.08</b>             | <b>0.66</b>  | 0.16            | <b>0.62</b>            |                                 | 1.72   | -1.21         | <b>-0.07</b> 0.203 |
| BF210_24MHP212A_7-2            | 0.94            | 1.615E+09            | 1.990E-03            | 2.735E-07            | <b>0.81</b>             | <b>0.18</b>             | <b>0.63</b>  | 0.14            | <b>0.61</b>            |                                 | 1.72   | -1.10         | <b>0.01</b> 0.188  |
| BF210_24MHP212A_8-1            | 0.94            | 1.582E+09            | 1.989E-03            | 4.363E-07            | <b>0.43</b>             | <b>-0.26</b>            | <b>0.69</b>  | 0.22            | <b>0.63</b>            |                                 | 1.69   | -2.92         | <b>-0.37</b> 0.245 |
| BF210_24MHP212A_8-2            | 0.94            | 1.590E+09            | 1.989E-03            | 2.628E-07            | <b>0.42</b>             | <b>-0.34</b>            | <b>0.76</b>  | 0.13            | <b>0.61</b>            |                                 | 1.70   | -2.41         | <b>-0.38</b> 0.253 |
| BF210_24MHP212A_9-1            | 0.94            | 1.579E+09            | 1.989E-03            | 3.218E-07            | <b>0.62</b>             | <b>-0.25</b>            | <b>0.87</b>  | 0.16            | <b>0.62</b>            | zoned?                          | 1.69   | -3.06         | <b>-0.18</b> 0.243 |
| BF210_24MHP212A_9-2            | 0.94            | 1.589E+09            | 1.989E-03            | 4.049E-07            | <b>0.60</b>             | <b>-0.08</b>            | <b>0.68</b>  | 0.20            | <b>0.63</b>            | zoned?                          | 1.70   | -2.54         | <b>-0.20</b> 0.222 |
| <del>BF210_24MHP212A_9-3</del> | <del>0.94</del> | <del>1.575E+09</del> | <del>1.988E-03</del> | <del>2.460E-07</del> | <del><b>0.11</b></del>  | <del><b>-0.37</b></del> |              | <del>0.17</del> | <del><b>0.62</b></del> | low CPS, outlier; rejected      |        |               | 0.256              |
| BF210_24MHP212B_1-1            | 0.94            | 1.613E+09            | 1.989E-03            | 3.528E-07            | <b>0.42</b>             | <b>-0.04</b>            | <b>0.46</b>  | 0.18            | <b>0.62</b>            |                                 | 1.72   | -1.13         | <b>-0.38</b> 0.218 |
| BF210_24MHP212B_1-2            | 0.94            | 1.615E+09            | 1.990E-03            | 2.642E-07            | <b>1.02</b>             | <b>0.06</b>             | <b>0.96</b>  | 0.13            | <b>0.61</b>            |                                 | 1.72   | -1.10         | <b>0.22</b> 0.205  |
| BF210_24MHP212B_2-1            | 0.94            | 1.615E+09            | 1.989E-03            | 3.435E-07            | <b>0.44</b>             | <b>-0.02</b>            | <b>0.46</b>  | 0.17            | <b>0.62</b>            |                                 | 1.72   | -1.21         | <b>-0.36</b> 0.216 |
| BF210_24MHP212B_2-2            | 0.94            | 1.609E+09            | 1.990E-03            | 3.045E-07            | <b>0.90</b>             | <b>0.01</b>             | <b>0.89</b>  | 0.15            | <b>0.61</b>            |                                 | 1.72   | -1.33         | <b>0.10</b> 0.211  |
| BF210_24MHP212B_3-1            | 0.94            | 1.605E+09            | 1.989E-03            | 3.501E-07            | <b>0.43</b>             | <b>-0.15</b>            | <b>0.59</b>  | 0.17            | <b>0.62</b>            |                                 | 1.71   | -1.77         | <b>-0.37</b> 0.232 |
| BF210_24MHP212B_4-1            | 0.94            | 1.613E+09            | 1.990E-03            | 3.602E-07            | <b>0.81</b>             | <b>-0.01</b>            | <b>0.82</b>  | 0.18            | <b>0.62</b>            |                                 | 1.72   | -1.10         | <b>0.01</b> 0.214  |
| BF210_24MHP212B_4-2            | 0.94            | 1.617E+09            | 1.990E-03            | 3.505E-07            | <b>1.09</b>             | <b>0.01</b>             | <b>1.08</b>  | 0.17            | <b>0.62</b>            |                                 | 1.73   | -0.84         | <b>0.29</b> 0.212  |
| <del>BF210_24MHP212B_5-1</del> | <del>0.94</del> | <del>1.511E+09</del> | <del>1.986E-03</del> | <del>3.070E-07</del> | <del><b>-1.03</b></del> | <del><b>-1.98</b></del> |              | <del>0.15</del> | <del><b>0.61</b></del> | very low CPS, outlier; rejected |        |               | 0.397              |
| BF210_24MHP212B_6-1            | 0.94            | 1.605E+09            | 1.990E-03            | 2.985E-07            | <b>0.72</b>             | <b>-0.18</b>            | <b>0.90</b>  | 0.15            | <b>0.61</b>            |                                 | 1.71   | -1.71         | <b>-0.08</b> 0.234 |
| BF210_24MHP212B_7-1            | 0.94            | 1.615E+09            | 1.990E-03            | 3.454E-07            | <b>0.98</b>             | <b>-0.07</b>            | <b>1.06</b>  | 0.17            | <b>0.62</b>            |                                 | 1.72   | -1.19         | <b>0.18</b> 0.222  |
| BF210_24MHP212B_8-1            | 0.94            | 1.616E+09            | 1.990E-03            | 3.408E-07            | <b>0.92</b>             | <b>-0.03</b>            | <b>0.96</b>  | 0.17            | <b>0.62</b>            |                                 | 1.72   | -0.99         | <b>0.12</b> 0.217  |
| BF210_24MHP212B_9-1            | 0.94            | 1.615E+09            | 1.990E-03            | 2.291E-07            | <b>0.86</b>             | <b>-0.08</b>            | <b>0.94</b>  | 0.11            | <b>0.61</b>            |                                 | 1.73   | -0.91         | <b>0.06</b> 0.223  |
| BF210_24MHP212B_10-1           | 0.94            | 1.622E+09            | 1.990E-03            | 3.392E-07            | <b>1.12</b>             | <b>0.05</b>             | <b>1.07</b>  | 0.17            | <b>0.62</b>            |                                 | 1.73   | -0.46         | <b>0.32</b> 0.207  |
| BF210_24MHP212B_11-1           | 0.94            | 1.612E+09            | 1.990E-03            | 3.158E-07            | <b>0.91</b>             | <b>-0.17</b>            | <b>1.08</b>  | 0.16            | <b>0.62</b>            |                                 | 1.72   | -1.19         | <b>0.11</b> 0.234  |
| BF210_24MHP212B_12-1           | 0.94            | 1.611E+09            | 1.990E-03            | 2.717E-07            | <b>0.93</b>             | <b>-0.40</b>            | <b>1.34</b>  | 0.14            | <b>0.61</b>            |                                 | 1.72   | -1.26         | <b>0.13</b> 0.260  |
| 24MHP409A&B wolframite         |                 |                      |                      |                      |                         |                         |              |                 |                        |                                 |        |               |                    |
| 1 (average, n=30)              |                 | 1.377E+09            | 1.982E-03            | 5.465E-06            | <b>-3.17</b>            |                         | <b>2.11</b>  |                 | <b>2.73</b>            |                                 |        | <b>-5.28</b>  | <b>0.38 1.30</b>   |
| BF210_24MHP409A_1-1            | 0.93            | 1.349E+09            | 1.982E-03            | 4.084E-07            | <b>-3.33</b>            | <b>-4.19</b>            | <b>0.87</b>  | 0.20            | <b>0.63</b>            |                                 | 1.45   | -17.00        | <b>-5.44</b> 0.537 |
| BF210_24MHP409A_1-2            | 0.93            | 1.355E+09            | 1.982E-03            | 3.565E-07            | <b>-3.29</b>            | <b>-3.10</b>            | <b>-0.19</b> | 0.18            | <b>0.62</b>            |                                 | 1.45   | -16.47        | <b>-5.40</b> 0.473 |
| BF210_24MHP409A_2-1            | 0.93            | 1.382E+09            | 1.982E-03            | 4.745E-07            | <b>-3.05</b>            | <b>-2.53</b>            | <b>-0.51</b> | 0.24            | <b>0.64</b>            |                                 | 1.48   | -15.00        | <b>-5.16</b> 0.436 |
| BF210_24MHP409A_2-2            | 0.93            | 1.401E+09            | 1.983E-03            | 3.812E-07            | <b>-2.59</b>            | <b>-3.04</b>            | <b>0.45</b>  | 0.19            | <b>0.62</b>            |                                 | 1.50   | -13.80        | <b>-4.70</b> 0.469 |
| BF210_24MHP409A_3-1            | 0.93            | 1.434E+09            | 1.984E-03            | 4.065E-07            | <b>-1.93</b>            | <b>-2.63</b>            | <b>0.70</b>  | 0.20            | <b>0.63</b>            |                                 | 1.53   | -11.89        | <b>-4.04</b> 0.443 |
| BF210_24MHP409A_4-1            | 0.93            | 1.448E+09            | 1.984E-03            | 3.578E-07            | <b>-1.91</b>            | <b>-2.76</b>            | <b>0.84</b>  | 0.18            | <b>0.62</b>            |                                 | 1.55   | -10.99        | <b>-4.02</b> 0.451 |
| BF210_24MHP409A_4-2            | 0.93            | 1.465E+09            | 1.984E-03            | 3.013E-07            | <b>-1.94</b>            | <b>-3.18</b>            | <b>1.24</b>  | 0.15            | <b>0.61</b>            |                                 | 1.57   | -9.94         | <b>-4.05</b> 0.478 |
| BF210_24MHP409A_5-1            | 0.93            | 1.390E+09            | 1.983E-03            | 3.515E-07            | <b>-2.45</b>            | <b>-3.46</b>            | <b>1.01</b>  | 0.18            | <b>0.62</b>            |                                 | 1.49   | -14.55        | <b>-4.56</b> 0.494 |

|                             |      |           |           |           |              |              |              |      |             |                   |      |        |              |                  |
|-----------------------------|------|-----------|-----------|-----------|--------------|--------------|--------------|------|-------------|-------------------|------|--------|--------------|------------------|
| BF210_24MHP409A_5-2         | 0.93 | 1.432E+09 | 1.984E-03 | 5.147E-07 | <b>-1.94</b> | <b>-3.22</b> | <b>1.28</b>  | 0.26 | <b>0.65</b> |                   | 1.53 | -12.04 | <b>-4.05</b> | 0.481            |
| BF210_24MHP409A_6-1         | 0.93 | 1.461E+09 | 1.985E-03 | 3.810E-07 | <b>-1.50</b> | <b>-2.51</b> | <b>1.01</b>  | 0.19 | <b>0.62</b> |                   | 1.56 | -10.25 | <b>-3.61</b> | 0.435            |
| BF210_24MHP409A_6-2         | 0.93 | 1.452E+09 | 1.985E-03 | 5.033E-07 | <b>-1.62</b> | <b>-2.84</b> | <b>1.22</b>  | 0.25 | <b>0.65</b> |                   | 1.55 | -10.75 | <b>-3.73</b> | 0.456            |
| BF210_24MHP409A_7-1         | 0.93 | 1.535E+09 | 1.986E-03 | 3.067E-07 | <b>-1.27</b> | <b>-1.17</b> | <b>-0.10</b> | 0.15 | <b>0.61</b> | off trendline     | 1.64 | -5.64  | <b>-3.38</b> | 0.333            |
| BF210_24MHP409A_7-2         | 0.93 | 1.556E+09 | 1.988E-03 | 4.277E-07 | <b>-0.33</b> | <b>-2.00</b> | <b>1.67</b>  | 0.21 | <b>0.63</b> |                   | 1.67 | -4.12  | <b>-2.44</b> | 0.399            |
| BF210_24MHP409A_8-1         | 0.93 | 1.427E+09 | 1.984E-03 | 6.547E-07 | <b>-2.24</b> | <b>-3.06</b> | <b>0.81</b>  | 0.33 | <b>0.68</b> |                   | 1.53 | -12.13 | <b>-4.35</b> | 0.470            |
| BF210_24MHP409A_8-2         | 0.93 | 1.372E+09 | 1.982E-03 | 3.164E-07 | <b>-2.97</b> | <b>-3.37</b> | <b>0.40</b>  | 0.16 | <b>0.62</b> |                   | 1.47 | -15.43 | <b>-5.08</b> | 0.490            |
| BF210_24MHP409B_1-1         | 0.93 | 1.269E+09 | 1.978E-03 | 3.539E-07 | <b>-5.27</b> | <b>-5.92</b> | <b>0.66</b>  | 0.18 | <b>0.62</b> |                   | 1.36 | -21.90 | <b>-7.38</b> | 0.625            |
| BF210_24MHP409B_2-1         | 0.93 | 1.321E+09 | 1.980E-03 | 3.333E-07 | <b>-4.33</b> | <b>-5.01</b> | <b>0.68</b>  | 0.17 | <b>0.62</b> |                   | 1.42 | -18.71 | <b>-6.44</b> | 0.580            |
| BF210_24MHP409B_3-1         | 0.93 | 1.425E+09 | 1.983E-03 | 2.788E-07 | <b>-2.58</b> | <b>-3.33</b> | <b>0.75</b>  | 0.14 | <b>0.61</b> |                   | 1.53 | -12.37 | <b>-4.69</b> | 0.487            |
| BF210_24MHP409B_3-2         | 0.93 | 1.315E+09 | 1.980E-03 | 3.760E-07 | <b>-4.38</b> | <b>-3.77</b> | <b>-0.60</b> | 0.19 | <b>0.62</b> |                   | 1.41 | -19.01 | <b>-6.49</b> | 0.513            |
| BF210_24MHP409B_4-1         | 0.93 | 1.372E+09 | 1.982E-03 | 3.241E-07 | <b>-3.32</b> | <b>-2.60</b> | <b>-0.72</b> | 0.16 | <b>0.62</b> |                   | 1.47 | -15.66 | <b>-5.43</b> | 0.441            |
| BF210_24MHP409B_4-2         | 0.93 | 1.388E+09 | 1.982E-03 | 3.855E-07 | <b>-2.99</b> | <b>-2.22</b> | <b>-0.77</b> | 0.19 | <b>0.62</b> |                   | 1.49 | -14.63 | <b>-5.10</b> | 0.415            |
| BF210_24MHP409B_5-1         | 0.93 | 1.406E+09 | 1.983E-03 | 3.722E-07 | <b>-2.72</b> | <b>-2.90</b> | <b>0.18</b>  | 0.19 | <b>0.62</b> |                   | 1.51 | -13.60 | <b>-4.83</b> | 0.460            |
| BF210_24MHP409B_6-1         | 0.93 | 1.257E+09 | 1.978E-03 | 3.734E-07 | <b>-5.15</b> | <b>-5.62</b> | <b>0.47</b>  | 0.19 | <b>0.62</b> |                   | 1.35 | -22.76 | <b>-7.26</b> | 0.611            |
| BF210_24MHP409B_7-1         | 0.93 | 1.259E+09 | 1.976E-03 | 2.812E-07 | <b>-5.92</b> | <b>-5.45</b> | <b>-0.48</b> | 0.14 | <b>0.61</b> | off trendline     | 1.35 | -22.61 | <b>-8.03</b> | 0.602            |
| BF210_24MHP409B_8-1         | 0.93 | 1.286E+09 | 1.979E-03 | 3.158E-07 | <b>-4.69</b> | <b>-5.04</b> | <b>0.35</b>  | 0.16 | <b>0.62</b> |                   | 1.38 | -20.86 | <b>-6.80</b> | 0.582            |
| BF210_24MHP409B_9-1         | 0.93 | 1.265E+09 | 1.978E-03 | 4.015E-07 | <b>-5.03</b> | <b>-5.09</b> | <b>0.06</b>  | 0.20 | <b>0.63</b> |                   | 1.36 | -22.19 | <b>-7.14</b> | 0.584            |
| BF210_24MHP409B_9-2         | 0.93 | 1.328E+09 | 1.980E-03 | 4.376E-07 | <b>-4.21</b> | <b>-3.94</b> | <b>-0.28</b> | 0.22 | <b>0.63</b> |                   | 1.42 | -18.25 | <b>-6.32</b> | 0.522            |
| BF210_24MHP409B_10-1        | 0.93 | 1.285E+09 | 1.979E-03 | 3.274E-07 | <b>-4.58</b> | <b>-4.72</b> | <b>0.14</b>  | 0.16 | <b>0.62</b> |                   | 1.38 | -20.87 | <b>-6.69</b> | 0.565            |
| BF210_24MHP409B_11-1        | 0.93 | 1.306E+09 | 1.979E-03 | 4.131E-07 | <b>-4.51</b> | <b>-4.50</b> | <b>-0.01</b> | 0.21 | <b>0.63</b> |                   | 1.40 | -19.38 | <b>-6.62</b> | 0.553            |
| BF210_24MHP409B_11-2        | 0.93 | 1.370E+09 | 1.982E-03 | 3.041E-07 | <b>-3.10</b> | <b>-3.28</b> | <b>0.18</b>  | 0.15 | <b>0.61</b> |                   | 1.47 | -15.49 | <b>-5.21</b> | 0.484            |
| 24MHP414A wolframite        |      |           |           |           |              |              |              |      |             |                   |      |        |              |                  |
| 1 (average, n=18 out of 20) |      | 1.439E+09 | 1.985E-03 | 3.303E-06 | <b>-1.87</b> |              | <b>2.04</b>  |      | <b>1.65</b> |                   |      |        | <b>-3.91</b> | <b>1.27 1.02</b> |
| BF210_24MHP414A_1-1         | 0.93 | 1.417E+09 | 1.983E-03 | 3.222E-07 | <b>-2.45</b> | <b>-4.48</b> | <b>2.03</b>  | 0.16 | <b>0.62</b> |                   | 1.52 | -12.69 | <b>-4.49</b> | 0.552            |
| BF210_24MHP414A_2-1         | 0.93 | 1.386E+09 | 1.983E-03 | 6.646E-07 | <b>-2.77</b> | <b>-5.00</b> | <b>2.23</b>  | 0.33 | <b>0.68</b> |                   | 1.49 | -14.57 | <b>-4.81</b> | 0.580            |
| BF210_24MHP414A_3-1         | 0.93 | 1.476E+09 | 1.986E-03 | 3.873E-07 | <b>-1.29</b> | <b>-2.73</b> | <b>1.43</b>  | 0.19 | <b>0.63</b> |                   | 1.58 | -9.01  | <b>-3.33</b> | 0.449            |
| BF210_24MHP414A_4-1         | 0.93 | 1.465E+09 | 1.985E-03 | 3.119E-07 | <b>-1.41</b> | <b>-3.05</b> | <b>1.64</b>  | 0.16 | <b>0.61</b> |                   | 1.57 | -9.65  | <b>-3.45</b> | 0.469            |
| BF210_24MHP414A_5-1         | 0.93 | 1.468E+09 | 1.986E-03 | 3.209E-07 | <b>-1.37</b> | <b>-2.07</b> | <b>0.70</b>  | 0.16 | <b>0.62</b> |                   | 1.57 | -9.61  | <b>-3.41</b> | 0.404            |
| BF210_24MHP414A_6-1         | 0.93 | 1.500E+09 | 1.986E-03 | 5.022E-07 | <b>-0.98</b> | <b>-1.95</b> | <b>0.97</b>  | 0.25 | <b>0.65</b> |                   | 1.61 | -7.73  | <b>-3.02</b> | 0.395            |
| BF210_24MHP414A_7-1         | 0.93 | 1.369E+09 | 1.982E-03 | 2.970E-07 | <b>-3.19</b> | <b>-3.62</b> | <b>0.43</b>  | 0.15 | <b>0.61</b> |                   | 1.47 | -15.79 | <b>-5.23</b> | 0.504            |
| BF210_24MHP414A_7-2         | 0.93 | 1.311E+09 | 1.980E-03 | 4.358E-07 | <b>-4.32</b> | <b>-3.82</b> | <b>-0.50</b> | 0.22 | <b>0.63</b> | low CPS; rejected |      |        | <b>-6.36</b> | 0.516            |
| BF210_24MHP414A_8-1         | 0.93 | 1.373E+09 | 1.983E-03 | 3.108E-07 | <b>-2.77</b> | <b>-3.56</b> | <b>0.79</b>  | 0.16 | <b>0.61</b> |                   | 1.47 | -15.47 | <b>-4.81</b> | 0.501            |
| BF210_24MHP414A_8-2         | 0.93 | 1.384E+09 | 1.983E-03 | 4.660E-07 | <b>-2.72</b> | <b>-4.00</b> | <b>1.28</b>  | 0.23 | <b>0.64</b> |                   | 1.48 | -14.76 | <b>-4.76</b> | 0.526            |
| BF210_24MHP414A_9-1         | 0.93 | 1.517E+09 | 1.987E-03 | 4.253E-07 | <b>-0.43</b> | <b>-1.33</b> | <b>0.91</b>  | 0.21 | <b>0.63</b> |                   | 1.63 | -6.51  | <b>-2.47</b> | 0.347            |
| BF210_24MHP414A_9-2         | 0.93 | 1.468E+09 | 1.986E-03 | 3.518E-07 | <b>-1.20</b> | <b>-2.68</b> | <b>1.48</b>  | 0.18 | <b>0.62</b> |                   | 1.58 | -9.55  | <b>-3.24</b> | 0.446            |
| BF210_24MHP414A_10-1        | 0.93 | 1.413E+09 | 1.984E-03 | 4.239E-07 | <b>-2.29</b> | <b>-3.85</b> | <b>1.56</b>  | 0.21 | <b>0.63</b> |                   | 1.52 | -12.90 | <b>-4.33</b> | 0.518            |
| BF210_24MHP414A_10-2        | 0.93 | 1.383E+09 | 1.982E-03 | 3.648E-07 | <b>-3.33</b> | <b>-4.07</b> | <b>0.73</b>  | 0.18 | <b>0.62</b> |                   | 1.48 | -14.79 | <b>-5.37</b> | 0.530            |
| BF210_24MHP414A_11-1        | 0.93 | 1.270E+09 | 1.977E-03 | 3.900E-07 | <b>-5.67</b> | <b>-6.12</b> | <b>0.19</b>  | 0.19 | <b>0.63</b> | low CPS; rejected |      |        |              | 0.635            |
| BF210_24MHP414A_12-1        | 0.93 | 1.475E+09 | 1.986E-03 | 3.645E-07 | <b>-1.30</b> | <b>-1.83</b> | <b>0.54</b>  | 0.18 | <b>0.62</b> |                   | 1.59 | -8.91  | <b>-3.34</b> | 0.386            |
| BF210_24MHP414A_12-2        | 0.93 | 1.449E+09 | 1.985E-03 | 3.129E-07 | <b>-1.69</b> | <b>-3.12</b> | <b>1.44</b>  | 0.16 | <b>0.61</b> |                   | 1.56 | -10.55 | <b>-3.73</b> | 0.474            |
| BF210_24MHP414A_13-1        | 0.93 | 1.446E+09 | 1.985E-03 | 3.708E-07 | <b>-1.61</b> | <b>-3.28</b> | <b>1.67</b>  | 0.18 | <b>0.62</b> |                   | 1.56 | -10.65 | <b>-3.65</b> | 0.484            |
| BF210_24MHP414A_13-2        | 0.93 | 1.451E+09 | 1.985E-03 | 3.938E-07 | <b>-1.40</b> | <b>-2.83</b> | <b>1.44</b>  | 0.20 | <b>0.63</b> |                   | 1.56 | -10.34 | <b>-3.44</b> | 0.456            |
| BF210_24MHP414A_13-3        | 0.93 | 1.455E+09 | 1.985E-03 | 3.587E-07 | <b>-1.41</b> | <b>-2.99</b> | <b>1.58</b>  | 0.18 | <b>0.62</b> |                   | 1.57 | -10.11 | <b>-3.45</b> | 0.466            |

|                               |                                 |                 |                      |                      |                      |                  |                  |                  |                 |                 |                                   |              |                                |
|-------------------------------|---------------------------------|-----------------|----------------------|----------------------|----------------------|------------------|------------------|------------------|-----------------|-----------------|-----------------------------------|--------------|--------------------------------|
| 24MHP415A wolframite          |                                 |                 |                      |                      |                      |                  |                  |                  |                 |                 |                                   |              |                                |
| 1                             | (average, n=17 out of 20)       |                 | 1.428E+09            | 1.983E-03            | 5.262E-06            | <b>-2.53</b>     |                  | <b>1.49</b>      |                 | <b>2.62</b>     |                                   | <b>-4.02</b> | <b>1.09 0.87</b>               |
|                               | BF210_24MHP415A_1-1             | 0.93            | 1.416E+09            | 1.984E-03            | 3.051E-07            | <b>-2.09</b>     | <b>-2.97</b>     | <b>0.88</b>      | 0.15            | <b>0.61</b>     | 1.52                              | -12.58       | <b>-3.58</b> 0.465             |
|                               | BF210_24MHP415A_1-2             | 0.93            | 1.431E+09            | 1.984E-03            | 4.231E-07            | <b>-1.91</b>     | <b>-3.29</b>     | <b>1.38</b>      | 0.21            | <b>0.63</b>     | 1.54                              | -11.55       | <b>-3.40</b> 0.484             |
|                               | BF210_24MHP415A_2-1             | 0.93            | 1.505E+09            | 1.982E-03            | 4.166E-07            | <b>-2.99</b>     | <b>-4.53</b>     | <b>1.54</b>      | 0.21            | <b>0.63</b>     | 1.62                              | -7.10        | <b>-4.48</b> 0.555             |
|                               | BF210_24MHP415A_2-2             | 1.02            | 1.611E+09            | 1.987E-03            | 2.978E-07            | <b>-0.57</b>     | <b>-1.76</b>     | <b>1.18</b>      | 0.15            | <b>0.61</b>     | 1.58                              | -9.12        | <b>-2.06</b> 0.381             |
|                               | BF210_24MHP415A_3-1             | 0.99            | 1.423E+09            | 1.983E-03            | 2.909E-07            | <b>-2.81</b>     | <b>-4.02</b>     | <b>1.21</b>      | 0.15            | <b>0.61</b>     | 1.44                              | -17.36       | <b>-4.30</b> 0.527             |
|                               | BF210_24MHP415A_3-2             | 0.96            | 1.343E+09            | 1.980E-03            | 3.924E-07            | <b>-3.99</b>     | <b>-5.06</b>     | <b>1.07</b>      | 0.20            | <b>0.63</b>     | 1.39                              | -19.94       | <b>-5.48</b> 0.583             |
|                               | BF210_24MHP415A_4-1             | 0.96            | 1.399E+09            | 1.982E-03            | 4.376E-07            | <b>-3.24</b>     | <b>-3.91</b>     | <b>0.68</b>      | 0.22            | <b>0.63</b>     | 1.46                              | -15.96       | <b>-4.73</b> 0.521             |
|                               | BF210_24MHP415A_4-2             | 0.95            | 1.376E+09            | 1.981E-03            | 3.917E-07            | <b>-3.63</b>     | <b>-5.50</b>     | <b>1.87</b>      | 0.20            | <b>0.63</b>     | 1.45                              | -16.94       | <b>-5.12</b> 0.605             |
|                               | BF210_24MHP415A_5-1             | 0.95            | 1.549E+09            | 1.988E-03            | 3.265E-07            | <b>-0.18</b>     | <b>-1.58</b>     | <b>1.40</b>      | 0.16            | <b>0.62</b>     | 1.64                              | -6.02        | <b>-1.67</b> 0.367             |
|                               | BF210_24MHP415A_5-2             | 0.94            | 1.380E+09            | 1.981E-03            | 6.252E-07            | <b>-3.41</b>     | <b>-4.37</b>     | <b>0.97</b>      | 0.31            | <b>0.67</b>     | 1.46                              | -15.94       | <b>-4.90</b> 0.547             |
|                               | BF210_24MHP415A_6-1             | 0.94            | 1.335E+09            | 1.981E-03            | 4.071E-07            | <b>-3.78</b>     | <b>-4.47</b>     | <b>0.69</b>      | 0.20            | <b>0.63</b>     | 1.42                              | -18.57       | <b>-5.27</b> 0.552             |
|                               | <del>BF210_24MHP415A_6-2</del>  | <del>0.94</del> | <del>1.377E+09</del> | <del>1.979E-03</del> | <del>5.655E-07</del> | <del>-4.67</del> | <del>-4.61</del> | <del>-0.06</del> | <del>0.28</del> | <del>0.66</del> | off trendline / outlier; rejected |              | <del>-6.16</del> 0.559         |
|                               | BF210_24MHP415A_7-1             | 0.94            | 1.471E+09            | 1.985E-03            | 3.223E-07            | <b>-1.45</b>     | <b>-2.05</b>     | <b>0.60</b>      | 0.16            | <b>0.62</b>     | 1.57                              | -9.96        | <b>-2.94</b> 0.403             |
|                               | BF210_24MHP415A_7-2             | 0.94            | 1.467E+09            | 1.985E-03            | 5.140E-07            | <b>-1.39</b>     | <b>-2.03</b>     | <b>0.64</b>      | 0.26            | <b>0.65</b>     | 1.57                              | -10.13       | <b>-2.88</b> 0.401             |
|                               | BF210_24MHP415A_8-1             | 0.94            | 1.365E+09            | 1.982E-03            | 3.779E-07            | <b>-3.25</b>     | <b>-5.28</b>     | <b>2.03</b>      | 0.19            | <b>0.62</b>     | 1.46                              | -16.34       | <b>-4.74</b> 0.594             |
|                               | BF210_24MHP415A_8-2             | 0.93            | 1.333E+09            | 1.981E-03            | 3.115E-07            | <b>-3.82</b>     | <b>-4.75</b>     | <b>0.93</b>      | 0.16            | <b>0.61</b>     | 1.43                              | -18.08       | <b>-5.31</b> 0.567             |
|                               | BF210_24MHP415A_9-1             | 0.93            | 1.528E+09            | 1.987E-03            | 4.367E-07            | <b>-0.42</b>     | <b>-1.03</b>     | <b>0.62</b>      | 0.22            | <b>0.63</b>     | 1.64                              | -6.07        | <b>-1.91</b> 0.321             |
|                               | BF210_24MHP415A_10-1            | 0.93            | 1.336E+09            | 1.980E-03            | 4.755E-07            | <b>-4.11</b>     | <b>-5.01</b>     | <b>0.90</b>      | 0.24            | <b>0.64</b>     | 1.43                              | -17.81       | <b>-5.60</b> 0.580             |
|                               | <del>BF210_24MHP415A_11-1</del> | <del>0.93</del> | <del>1.191E+09</del> | <del>1.975E-03</del> | <del>4.872E-07</del> | <del>-6.46</del> | <del>-7.96</del> | <del>1.50</del>  | <del>0.24</del> | <del>0.64</del> | low CPS/outlier; rejected         |              | <del>-7.95</del> 0.716         |
|                               | <del>BF210_24MHP415A_12-1</del> | <del>0.93</del> | <del>1.464E+09</del> | <del>1.985E-03</del> | <del>3.790E-07</del> | <del>-1.53</del> | <del>-4.44</del> | <del>2.91</del>  | <del>0.19</del> | <del>0.62</del> | outlier; rejected                 |              | <del>-3.02</del> 0.550         |
| 24MHP416 wolframite (average, |                                 |                 |                      |                      |                      |                  |                  |                  |                 |                 |                                   |              |                                |
| 1                             | n=19 out of 20)                 |                 | 1.395E+09            | 1.982E-03            | 2.929E-06            | <b>-3.26</b>     |                  | <b>2.11</b>      |                 | <b>1.46</b>     |                                   | <b>-5.37</b> | <b>1.11 0.84</b>               |
|                               | BF210_24MHP416_1-1              | 0.94            | 1.353E+09            | 1.981E-03            | 4.896E-07            | <b>-3.70</b>     | <b>-4.76</b>     | <b>1.06</b>      | 0.24            | <b>0.64</b>     | 1.43                              | -17.76       | <b>-5.81</b> 0.567             |
|                               | BF210_24MHP416_2-1              | 0.94            | 1.390E+09            | 1.982E-03            | 4.879E-07            | <b>-3.08</b>     | <b>-4.51</b>     | <b>1.43</b>      | 0.24            | <b>0.64</b>     | 1.47                              | -15.46       | <b>-5.19</b> 0.554             |
|                               | BF210_24MHP416_3-1              | 0.94            | 1.320E+09            | 1.980E-03            | 4.427E-07            | <b>-4.30</b>     | <b>-5.20</b>     | <b>0.90</b>      | 0.22            | <b>0.63</b>     | 1.40                              | -19.67       | <b>-6.41</b> 0.590             |
|                               | BF210_24MHP416_4-1              | 0.94            | 1.434E+09            | 1.979E-03            | 1.623E-06            | <b>-4.59</b>     | <b>-5.14</b>     | <b>0.55</b>      | 0.81            | <b>1.00</b>     | off trendline                     |              | 1.52 -12.53 <b>-6.70</b> 0.587 |
|                               | BF210_24MHP416_5-1              | 1.03            | 1.500E+09            | 1.983E-03            | 3.404E-07            | <b>-2.43</b>     | <b>-3.82</b>     | <b>1.39</b>      | 0.17            | <b>0.62</b>     | off trendline                     |              | 1.45 -16.54 <b>-4.54</b> 0.516 |
|                               | BF210_24MHP416_6-1              | 0.99            | 1.371E+09            | 1.980E-03            | 3.454E-07            | <b>-3.90</b>     | <b>-4.11</b>     | <b>0.21</b>      | 0.17            | <b>0.62</b>     | 1.39                              | -20.11       | <b>-6.01</b> 0.532             |
|                               | BF210_24MHP416_7-1              | 0.98            | 1.334E+09            | 1.980E-03            | 6.200E-07            | <b>-4.17</b>     | <b>-4.88</b>     | <b>0.71</b>      | 0.31            | <b>0.67</b>     | 1.37                              | -21.49       | <b>-6.28</b> 0.573             |
|                               | BF210_24MHP416_8-1              | 0.97            | 1.478E+09            | 1.985E-03            | 3.457E-07            | <b>-1.86</b>     | <b>-3.77</b>     | <b>1.91</b>      | 0.17            | <b>0.62</b>     | 1.53                              | -12.35       | <b>-3.97</b> 0.513             |
|                               | BF210_24MHP416_8-2              | 0.96            | 1.403E+09            | 1.982E-03            | 2.566E-07            | <b>-3.29</b>     | <b>-4.13</b>     | <b>0.83</b>      | 0.13            | <b>0.61</b>     | 1.46                              | -16.29       | <b>-5.40</b> 0.533             |
|                               | BF210_24MHP416_9-1              | 0.96            | 1.412E+09            | 1.982E-03            | 3.840E-07            | <b>-2.91</b>     | <b>-3.81</b>     | <b>0.90</b>      | 0.19            | <b>0.62</b>     | 1.47                              | -15.53       | <b>-5.02</b> 0.515             |
|                               | <del>BF210_24MHP416_10-1</del>  | <del>0.95</del> | <del>1.345E+09</del> | <del>1.980E-03</del> | <del>2.925E-07</del> | <del>-3.97</del> | <del>-3.48</del> | <del>-0.49</del> | <del>0.15</del> | <del>0.61</del> | outlier; rejected                 |              | <del>-6.08</del> 0.496         |
|                               | BF210_24MHP416_11-1             | 0.95            | 1.423E+09            | 1.983E-03            | 4.262E-07            | <b>-2.41</b>     | <b>-3.88</b>     | <b>1.47</b>      | 0.21            | <b>0.63</b>     | 1.49                              | -14.22       | <b>-4.52</b> 0.519             |
|                               | BF210_24MHP416_12-1             | 0.95            | 1.378E+09            | 1.982E-03            | 3.742E-07            | <b>-3.14</b>     | <b>-5.09</b>     | <b>1.94</b>      | 0.19            | <b>0.62</b>     | 1.45                              | -16.92       | <b>-5.25</b> 0.584             |
|                               | BF210_24MHP416_13-1             | 0.95            | 1.379E+09            | 1.981E-03            | 4.599E-07            | <b>-3.55</b>     | <b>-4.50</b>     | <b>0.95</b>      | 0.23            | <b>0.64</b>     | 1.45                              | -16.84       | <b>-5.66</b> 0.554             |
|                               | BF210_24MHP416_14-1             | 0.95            | 1.420E+09            | 1.983E-03            | 4.439E-07            | <b>-2.53</b>     | <b>-3.59</b>     | <b>1.05</b>      | 0.22            | <b>0.63</b>     | 1.49                              | -14.26       | <b>-4.64</b> 0.502             |
|                               | BF210_24MHP416_14-2             | 0.95            | 1.423E+09            | 1.983E-03            | 3.484E-07            | <b>-2.47</b>     | <b>-3.73</b>     | <b>1.26</b>      | 0.17            | <b>0.62</b>     | 1.50                              | -13.90       | <b>-4.58</b> 0.511             |
|                               | BF210_24MHP416_15-1             | 0.95            | 1.350E+09            | 1.981E-03            | 3.173E-07            | <b>-3.86</b>     | <b>-5.00</b>     | <b>1.14</b>      | 0.16            | <b>0.62</b>     | 1.43                              | -18.14       | <b>-5.97</b> 0.580             |
|                               | BF210_24MHP416_15-2             | 0.95            | 1.361E+09            | 1.981E-03            | 3.452E-07            | <b>-3.67</b>     | <b>-4.84</b>     | <b>1.17</b>      | 0.17            | <b>0.62</b>     | 1.44                              | -17.32       | <b>-5.78</b> 0.571             |
|                               | BF210_24MHP416_16-1             | 0.94            | 1.410E+09            | 1.983E-03            | 3.897E-07            | <b>-2.83</b>     | <b>-3.95</b>     | <b>1.12</b>      | 0.19            | <b>0.63</b>     | 1.49                              | -14.23       | <b>-4.94</b> 0.523             |
|                               | BF210_24MHP416_16-2             | 0.94            | 1.374E+09            | 1.982E-03            | 3.699E-07            | <b>-3.32</b>     | <b>-4.49</b>     | <b>1.17</b>      | 0.18            | <b>0.62</b>     | 1.46                              | -16.41       | <b>-5.43</b> 0.553             |

A6954

|                               |                           |      |                      |                      |                      |                 |             |              |                 |                 |             |                      |
|-------------------------------|---------------------------|------|----------------------|----------------------|----------------------|-----------------|-------------|--------------|-----------------|-----------------|-------------|----------------------|
| 24MHP12B wolframite (average, |                           |      |                      |                      |                      |                 |             |              |                 |                 |             |                      |
| 1                             | n=10)                     |      | 1.628E+09            | 1.990E-03            | 7.458E-07            | <b>1.11</b>     |             | <b>1.11</b>  |                 | <b>0.37</b>     | 1.7433      |                      |
|                               | A6954_24MHP12B_1-1        | 0.93 | 1.616E+09            | 1.989E-03            | 3.629E-07            | <b>0.79</b>     |             |              | 0.18            | <b>0.41</b>     | 1.73        | -0.73 <b>-0.32</b>   |
|                               | A6954_24MHP12B_1-2        | 0.93 | 1.617E+09            | 1.990E-03            | 3.556E-07            | <b>1.01</b>     |             |              | 0.18            | <b>0.41</b>     | 1.74        | -0.37 <b>-0.10</b>   |
|                               | A6954_24MHP12B_2-1        | 0.93 | 1.636E+09            | 1.990E-03            | 3.342E-07            | <b>1.19</b>     |             |              | 0.17            | <b>0.41</b>     | 1.76        | 0.91 <b>0.08</b>     |
|                               | A6954_24MHP12B_4-1        | 0.93 | 1.645E+09            | 1.990E-03            | 2.240E-07            | <b>1.13</b>     |             |              | 0.11            | <b>0.39</b>     | 1.78        | 1.90 <b>0.02</b>     |
|                               | A6954_24MHP12B_6-1        | 0.92 | 1.596E+09            | 1.990E-03            | 3.111E-07            | <b>1.03</b>     |             |              | 0.16            | <b>0.40</b>     | 1.73        | -1.00 <b>-0.08</b>   |
|                               | A6954_24MHP12B_7-1        | 0.92 | 1.628E+09            | 1.991E-03            | 2.963E-07            | <b>1.39</b>     |             |              | 0.15            | <b>0.40</b>     | 1.76        | 1.01 <b>0.28</b>     |
|                               | A6954_24MHP12B_9-1        | 0.98 | 1.667E+09            | 1.990E-03            | 3.372E-07            | <b>1.23</b>     |             |              | 0.17            | <b>0.41</b>     | 1.70        | -2.43 <b>0.12</b>    |
|                               | A6954_24MHP12B_27-1       | 0.94 | 1.620E+09            | 1.990E-03            | 2.517E-07            | <b>0.90</b>     |             |              | 0.13            | <b>0.39</b>     | 1.73        | -0.95 <b>-0.21</b>   |
|                               | A6954_24MHP12B_10-1       | 0.93 | 1.621E+09            | 1.990E-03            | 3.290E-07            | <b>1.07</b>     |             |              | 0.16            | <b>0.41</b>     | 1.75        | 0.22 <b>-0.04</b>    |
|                               | A6954_24MHP12B_11-1       | 0.92 | 1.635E+09            | 1.990E-03            | 2.199E-07            | <b>1.34</b>     |             |              | 0.11            | <b>0.39</b>     | 1.77        | 1.42 <b>0.23</b>     |
| 23DHT24J wolframite (average, |                           |      |                      |                      |                      |                 |             |              |                 |                 |             |                      |
| 1                             | n=10)                     |      | 1.045E+09            | 1.973E-03            | 1.738E-06            | <b>-7.52</b>    |             | <b>5.40</b>  |                 | <b>0.87</b>     |             | <b>-12.92</b>        |
|                               | A6954_23DHT-24J_1-1       | 0.93 | 1.043E+09            | 1.973E-03            | 8.301E-07            | <b>-7.48</b>    |             |              | 0.41            | <b>0.56</b>     | 1.12        | -35.76 <b>-12.88</b> |
|                               | A6954_23DHT-24J_15-1      | 0.93 | 1.051E+09            | 1.973E-03            | 5.169E-07            | <b>-7.42</b>    |             |              | 0.26            | <b>0.45</b>     | 1.13        | -35.18 <b>-12.82</b> |
|                               | A6954_23DHT-24J_16-1      | 0.93 | 1.043E+09            | 1.972E-03            | 6.434E-07            | <b>-7.73</b>    |             |              | 0.32            | <b>0.49</b>     | 1.12        | -35.73 <b>-13.13</b> |
|                               | A6954_23DHT-24J_3-1       | 0.93 | 1.036E+09            | 1.973E-03            | 5.865E-07            | <b>-7.22</b>    |             |              | 0.29            | <b>0.47</b>     | 1.11        | -36.14 <b>-12.62</b> |
|                               | A6954_23DHT-24J_4-1       | 0.93 | 1.042E+09            | 1.973E-03            | 7.014E-07            | <b>-7.46</b>    |             |              | 0.35            | <b>0.51</b>     | 1.12        | -35.70 <b>-12.86</b> |
|                               | A6954_23DHT-24J_21-1      | 0.93 | 1.063E+09            | 1.975E-03            | 4.555E-07            | <b>-6.68</b>    |             |              | 0.23            | <b>0.44</b>     | 1.15        | -34.23 <b>-12.08</b> |
|                               | A6954_23DHT-24J_7-1       | 0.93 | 1.049E+09            | 1.973E-03            | 6.648E-07            | <b>-7.28</b>    |             |              | 0.33            | <b>0.50</b>     | 1.13        | -35.16 <b>-12.68</b> |
|                               | A6954_23DHT-24J_7-2       | 0.93 | 1.047E+09            | 1.973E-03            | 6.020E-07            | <b>-7.61</b>    |             |              | 0.30            | <b>0.48</b>     | 1.13        | -35.17 <b>-13.01</b> |
|                               | A6954_23DHT-24J_8-2       | 0.93 | 1.036E+09            | 1.972E-03            | 4.758E-07            | <b>-8.17</b>    |             |              | 0.24            | <b>0.44</b>     | 1.12        | -35.90 <b>-13.57</b> |
|                               | A6954_23DHT-24J_9-1       | 0.93 | 1.037E+09            | 1.972E-03            | 5.309E-07            | <b>-8.14</b>    |             |              | 0.26            | <b>0.46</b>     | 1.12        | -35.78 <b>-13.54</b> |
| <b>SHRIMP SI</b>              |                           |      |                      |                      |                      |                 |             |              |                 |                 |             |                      |
| <b>Session-260212</b>         |                           |      |                      |                      |                      |                 |             |              |                 |                 |             |                      |
| <b>BF184-BF288</b>            |                           |      |                      |                      |                      |                 |             |              |                 |                 |             |                      |
| 24MHP12B wolframite (average, |                           |      |                      |                      |                      |                 |             |              |                 |                 |             |                      |
| 2                             | n=28 out of 32)           |      | 4.864E+08            | 1.982E-03            | 1.359E-06            | <b>1.11</b>     |             | <b>1.11</b>  |                 | <b>0.68</b>     |             | <b>0.00</b>          |
|                               | 12B_BF184_2.2             |      | 4.581E+08            | 1.982E-03            | 2.360E-07            | <b>1.04</b>     | <b>0.35</b> | <b>0.70</b>  | 0.12            | <b>0.69</b>     |             | <b>-0.07</b> 0.218   |
|                               | 12B_7.15                  |      | 4.711E+08            | 1.980E-03            | 7.680E-07            | <b>0.33</b>     | <b>0.76</b> | <b>-0.43</b> | 0.38            | <b>0.78</b>     |             | <b>-0.78</b> 0.173   |
|                               | 12B_7.16                  |      | 4.720E+08            | 1.982E-03            | 9.040E-07            | <b>1.17</b>     |             |              | 0.45            | <b>0.81</b>     |             | <b>0.06</b>          |
|                               | 12B_BF184_8.1             |      | 5.485E+08            | 1.982E-03            | 1.016E-06            | <b>1.00</b>     | <b>1.13</b> | <b>-0.13</b> | 0.51            | <b>0.85</b>     |             | <b>-0.11</b> 0.131   |
|                               | 12B_BF184_8.2             |      | 5.089E+08            | 1.982E-03            | 3.410E-07            | <b>1.10</b>     |             |              | 0.17            | <b>0.70</b>     |             | <b>-0.01</b>         |
|                               | 12B_BF184_10.1            |      | 5.233E+08            | 1.982E-03            | 9.830E-07            | <b>1.32</b>     |             |              | 0.49            | <b>0.84</b>     |             | <b>0.21</b>          |
|                               | 12B_BF184_10.2            |      | 4.916E+08            | 1.982E-03            | 6.840E-07            | <b>1.05</b>     |             |              | 0.34            | <b>0.76</b>     |             | <b>-0.06</b>         |
|                               | 12B_BF184_12.1            |      | 5.316E+08            | 1.982E-03            | 1.474E-06            | <b>1.13</b>     |             |              | 0.74            | <b>1.00</b>     | large error | <b>0.02</b>          |
|                               | 12B_BF184_12.2            |      | 5.191E+08            | 1.981E-03            | 8.770E-07            | <b>0.51</b>     |             |              | 0.44            | <b>0.81</b>     |             | <b>-0.60</b>         |
|                               | 12B_BF184_15.1            |      | 5.471E+08            | 1.982E-03            | 1.241E-06            | <b>1.37</b>     |             |              | 0.62            | <b>0.92</b>     |             | <b>0.26</b>          |
|                               | 12B_BF184_16.1            |      | 5.378E+08            | 1.981E-03            | 1.379E-06            | <b>0.83</b>     |             |              | 0.69            | <b>0.97</b>     |             | <b>-0.28</b>         |
|                               | 12B_BF184_20.1            |      | 5.218E+08            | 1.982E-03            | 7.600E-07            | <b>1.32</b>     |             |              | 0.38            | <b>0.78</b>     |             | <b>0.21</b>          |
|                               | 12B_BF184_23.1            |      | 5.338E+08            | 1.982E-03            | 8.900E-07            | <b>1.31</b>     |             |              | 0.44            | <b>0.81</b>     |             | <b>0.20</b>          |
|                               | <del>12B_BF184_26.1</del> |      | <del>4.884E+08</del> | <del>1.984E-03</del> | <del>6.760E-07</del> | <del>1.99</del> |             |              | <del>0.34</del> | <del>0.76</del> | rejected    |                      |
|                               | 12B_BF184_26.2            |      | 4.817E+08            | 1.981E-03            | 7.210E-07            | <b>0.76</b>     |             |              | 0.36            | <b>0.77</b>     |             | <b>-0.35</b>         |
|                               | 12B_BF184_35.1            |      | 4.914E+08            | 1.981E-03            | 7.290E-07            | <b>0.85</b>     |             |              | 0.36            | <b>0.77</b>     |             | <b>-0.26</b>         |

|                            |                      |                      |                      |                  |              |              |                 |                 |             |              |       |
|----------------------------|----------------------|----------------------|----------------------|------------------|--------------|--------------|-----------------|-----------------|-------------|--------------|-------|
| 12B_BF184_38.1             | 4.812E+08            | 1.982E-03            | 7.510E-07            | <b>1.14</b>      |              |              | 0.37            | <b>0.77</b>     |             | <b>0.03</b>  |       |
| 12B_BF184_38.2             | 4.762E+08            | 1.983E-03            | 1.014E-06            | <b>1.53</b>      |              |              | 0.51            | <b>0.85</b>     |             | <b>0.42</b>  |       |
| 12B_BF184_39.1             | 4.881E+08            | 1.982E-03            | 7.450E-07            | <b>1.09</b>      |              |              | 0.37            | <b>0.77</b>     |             | <b>-0.02</b> |       |
| 12B_BF184_42.1             | 4.819E+08            | 1.982E-03            | 7.770E-07            | <b>1.36</b>      |              |              | 0.39            | <b>0.78</b>     |             | <b>0.25</b>  |       |
| <del>12B_BF184_45.1</del>  | <del>4.854E+08</del> | <del>1.980E-03</del> | <del>8.550E-07</del> | <del>0.13</del>  |              |              | <del>0.43</del> | <del>0.80</del> | rejected    |              |       |
| 12B_BF288_1.1              | 4.752E+08            | 1.982E-03            | 8.070E-07            | <b>0.94</b>      | <b>1.02</b>  | <b>-0.08</b> | 0.40            | <b>0.79</b>     |             | <b>-0.17</b> | 0.144 |
| 12B_BF288_2.1              | 4.647E+08            | 1.981E-03            | 5.550E-07            | <b>0.45</b>      | <b>0.96</b>  | <b>-0.51</b> | 0.28            | <b>0.73</b>     |             | <b>-0.66</b> | 0.150 |
| 12B_BF288_3.1              | 4.343E+08            | 1.983E-03            | 1.050E-06            | <b>1.68</b>      | <b>0.29</b>  | <b>1.39</b>  | 0.52            | <b>0.86</b>     |             | <b>0.57</b>  | 0.224 |
| 12B_BF288_4.1              | 4.510E+08            | 1.982E-03            | 1.319E-06            | <b>0.97</b>      | <b>1.32</b>  | <b>-0.35</b> | 0.66            | <b>0.94</b>     |             | <b>-0.14</b> | 0.109 |
| 12B_BF288_5.1              | 4.232E+08            | 1.982E-03            | 6.580E-07            | <b>1.26</b>      | <b>0.46</b>  | <b>0.79</b>  | 0.33            | <b>0.75</b>     |             | <b>0.15</b>  | 0.205 |
| <del>12B_BF288_6.1</del>   | <del>3.892E+08</del> | <del>1.980E-03</del> | <del>1.220E-06</del> | <del>-0.09</del> |              |              | <del>0.61</del> | <del>0.91</del> | rejected    |              |       |
| 12B_BF288_7.1              | 4.493E+08            | 1.982E-03            | 1.504E-06            | <b>1.01</b>      |              |              | 0.75            | <b>1.01</b>     | large error | <b>-0.10</b> |       |
| 12B_BF288_8.1              | 4.380E+08            | 1.983E-03            | 1.031E-06            | <b>1.71</b>      |              |              | 0.51            | <b>0.85</b>     |             | <b>0.60</b>  |       |
| 12B_BF288_9.1              | 4.537E+08            | 1.983E-03            | 1.171E-06            | <b>1.63</b>      |              |              | 0.58            | <b>0.89</b>     |             | <b>0.52</b>  |       |
| 12B_BF288_10.1             | 4.637E+08            | 1.982E-03            | 8.730E-07            | <b>1.22</b>      |              |              | 0.44            | <b>0.81</b>     |             | <b>0.11</b>  |       |
| <del>12B_BF288_11.1</del>  | <del>4.514E+08</del> | <del>1.980E-03</del> | <del>6.630E-07</del> | <del>-0.04</del> |              |              | <del>0.33</del> | <del>0.75</del> | rejected    |              |       |
| WHF1 Mn-rich wolframite    |                      |                      |                      |                  |              |              |                 |                 |             |              |       |
| 2 (average, n=10)          | 5.504E+08            | 1.987E-03            | 4.432E-06            | <b>3.63</b>      |              | <b>2.31</b>  |                 | <b>2.21</b>     |             | <b>1.32</b>  |       |
| 1_BF184_1.1                | 5.586E+08            | 1.988E-03            | 1.532E-06            | <b>4.04</b>      | <b>2.07</b>  | <b>1.97</b>  | 0.76            | <b>1.02</b>     | large error | <b>1.52</b>  | 0.017 |
| 1_BF184_1.2                | 5.619E+08            | 1.989E-03            | 1.252E-06            | <b>4.83</b>      | <b>2.03</b>  | <b>2.80</b>  | 0.62            | <b>0.92</b>     |             | <b>2.31</b>  | 0.022 |
| 1_BF184_2.1                | 5.587E+08            | 1.989E-03            | 1.777E-06            | <b>4.64</b>      | <b>2.07</b>  | <b>2.58</b>  | 0.89            | <b>1.12</b>     | large error | <b>2.12</b>  | 0.017 |
| 1_BF184_2.3                | 5.621E+08            | 1.987E-03            | 1.270E-06            | <b>3.87</b>      | <b>1.94</b>  | <b>1.94</b>  | 0.63            | <b>0.93</b>     |             | <b>1.35</b>  | 0.034 |
| 1_BF184_5.2                | 5.239E+08            | 1.982E-03            | 1.678E-06            | <b>1.41</b>      | <b>1.15</b>  | <b>0.26</b>  | 0.84            | <b>1.08</b>     | large error | <b>-1.11</b> | 0.129 |
| 1_BF184_5.3                | 5.671E+08            | 1.988E-03            | 1.082E-06            | <b>4.41</b>      | <b>2.15</b>  | <b>2.26</b>  | 0.54            | <b>0.87</b>     |             | <b>1.89</b>  | 0.007 |
| 1_BF184_6.1                | 5.363E+08            | 1.985E-03            | 9.880E-07            | <b>2.91</b>      | <b>1.02</b>  | <b>1.89</b>  | 0.49            | <b>0.84</b>     |             | <b>0.39</b>  | 0.143 |
| 1_BF184_6.2                | 5.297E+08            | 1.984E-03            | 5.920E-07            | <b>2.23</b>      | <b>1.05</b>  | <b>1.18</b>  | 0.30            | <b>0.74</b>     |             | <b>-0.29</b> | 0.140 |
| 1_BF184_8.1                | 5.507E+08            | 1.987E-03            | 1.348E-06            | <b>3.63</b>      | <b>2.17</b>  | <b>1.46</b>  | 0.67            | <b>0.95</b>     |             | <b>1.11</b>  | 0.004 |
| 1_BF184_8.2                | 5.550E+08            | 1.988E-03            | 1.556E-06            | <b>4.38</b>      | <b>2.19</b>  | <b>2.19</b>  | 0.78            | <b>1.03</b>     | large error | <b>1.86</b>  | 0.001 |
| WHF2 Mn-rich wolframite    |                      |                      |                      |                  |              |              |                 |                 |             |              |       |
| 2 (average, n=12)          | 5.681E+08            | 1.989E-03            | 1.299E-06            | <b>4.47</b>      |              | <b>1.61</b>  |                 | <b>0.65</b>     |             | <b>2.86</b>  |       |
| 2_BF184_1.1                | 5.688E+08            | 1.989E-03            | 1.595E-06            | <b>4.65</b>      | <b>2.18</b>  | <b>2.47</b>  | 0.80            | <b>1.05</b>     | large error | <b>3.04</b>  | 0.003 |
| 2_BF184_1.2                | 5.637E+08            | 1.988E-03            | 1.331E-06            | <b>4.24</b>      | <b>2.20</b>  | <b>2.05</b>  | 0.66            | <b>0.95</b>     |             | <b>2.63</b>  | 0.001 |
| 2_BF184_2.1                | 5.732E+08            | 1.989E-03            | 1.373E-06            | <b>4.81</b>      | <b>2.19</b>  | <b>2.62</b>  | 0.68            | <b>0.96</b>     |             | <b>3.20</b>  | 0.002 |
| 2_BF184_2.2                | 5.724E+08            | 1.989E-03            | 1.770E-06            | <b>4.50</b>      | <b>2.18</b>  | <b>2.31</b>  | 0.88            | <b>1.11</b>     | large error | <b>2.89</b>  | 0.002 |
| 2_BF184_3.1                | 5.703E+08            | 1.988E-03            | 7.800E-07            | <b>4.06</b>      | <b>2.19</b>  | <b>1.87</b>  | 0.39            | <b>0.78</b>     |             | <b>2.45</b>  | 0.001 |
| 2_BF184_3.2                | 5.753E+08            | 1.988E-03            | 1.336E-06            | <b>4.29</b>      | <b>2.20</b>  | <b>2.10</b>  | 0.67            | <b>0.95</b>     |             | <b>2.68</b>  | 0.001 |
| 2_BF184_4.1                | 5.698E+08            | 1.988E-03            | 1.099E-06            | <b>4.12</b>      | <b>2.19</b>  | <b>1.93</b>  | 0.55            | <b>0.87</b>     |             | <b>2.51</b>  | 0.002 |
| 2_BF184_4.2                | 5.596E+08            | 1.988E-03            | 7.900E-07            | <b>4.29</b>      | <b>2.19</b>  | <b>2.10</b>  | 0.39            | <b>0.78</b>     |             | <b>2.68</b>  | 0.002 |
| 2_BF184_5.1                | 5.604E+08            | 1.990E-03            | 9.350E-07            | <b>5.15</b>      | <b>2.19</b>  | <b>2.96</b>  | 0.47            | <b>0.82</b>     |             | <b>3.54</b>  | 0.002 |
| 2_BF184_5.2                | 5.678E+08            | 1.988E-03            | 1.679E-06            | <b>4.35</b>      | <b>2.18</b>  | <b>2.17</b>  | 0.84            | <b>1.08</b>     | large error | <b>2.74</b>  | 0.003 |
| 2_BF184_6.1                | 5.721E+08            | 1.989E-03            | 1.332E-06            | <b>4.84</b>      | <b>2.19</b>  | <b>2.65</b>  | 0.66            | <b>0.95</b>     |             | <b>3.23</b>  | 0.002 |
| 2_BF184_7.1                | 5.634E+08            | 1.988E-03            | 6.210E-07            | <b>4.32</b>      |              |              | 0.31            | <b>0.75</b>     |             | <b>2.71</b>  |       |
| WHF3 Fe-rich wolframite    |                      |                      |                      |                  |              |              |                 |                 |             |              |       |
| 2 (average, n=7 out of 10) | 3.484E+08            | 1.974E-03            | 1.195E-06            | <b>-2.91</b>     |              | <b>2.38</b>  |                 | <b>0.60</b>     |             | <b>-5.29</b> |       |
| 3x_BF184_1.1               | 3.450E+08            | 1.973E-03            | 1.120E-06            | <b>-3.22</b>     | <b>-7.07</b> | <b>3.86</b>  | 0.56            | <b>0.88</b>     |             | <b>-5.60</b> | 0.850 |

|                               |                      |                      |                      |                         |                         |             |                 |             |                   |              |                  |
|-------------------------------|----------------------|----------------------|----------------------|-------------------------|-------------------------|-------------|-----------------|-------------|-------------------|--------------|------------------|
| 3x_BF184_2.1                  | 3.389E+08            | 1.974E-03            | 6.410E-07            | <b>-3.12</b>            | <b>-7.65</b>            | <b>4.53</b> | 0.32            | <b>0.75</b> |                   | <b>-5.50</b> | 0.891            |
| 3x_BF184_3.1                  | 3.604E+08            | 1.974E-03            | 2.500E-07            | <b>-2.66</b>            | <b>-6.30</b>            | <b>3.64</b> | 0.12            | <b>0.69</b> |                   | <b>-5.04</b> | 0.795            |
| <del>3x_BF184_3.2</del>       | <del>3.470E+08</del> | <del>1.979E-03</del> | <del>6.410E-07</del> | <del><b>-0.41</b></del> | <del><b>-7.19</b></del> |             | <del>0.32</del> | <b>0.75</b> | outlier; rejected |              | 0.859            |
| 3x_BF184_4.1                  | 3.605E+08            | 1.975E-03            | 6.980E-07            | <b>-2.44</b>            | <b>-6.45</b>            | <b>4.01</b> | 0.35            | <b>0.76</b> |                   | <b>-4.82</b> | 0.806            |
| 3x_BF184_4.2                  | 3.455E+08            | 1.974E-03            | 1.860E-07            | <b>-2.88</b>            | <b>-7.00</b>            | <b>4.12</b> | 0.09            | <b>0.68</b> |                   | <b>-5.26</b> | 0.845            |
| 3x_BF184_5.1                  | 3.433E+08            | 1.973E-03            | 4.050E-07            | <b>-3.24</b>            | <b>-7.01</b>            | <b>3.76</b> | 0.20            | <b>0.71</b> |                   | <b>-5.62</b> | 0.845            |
| 3x_BF184_5.2                  | 3.456E+08            | 1.974E-03            | 6.970E-07            | <b>-2.82</b>            | <b>-6.82</b>            | <b>4.00</b> | 0.35            | <b>0.76</b> |                   | <b>-5.20</b> | 0.832            |
| <del>3x_BF184_6.1</del>       | <del>3.447E+08</del> | <del>1.980E-03</del> | <del>9.010E-07</del> | <del><b>-0.01</b></del> | <del><b>-7.21</b></del> |             | <del>0.45</del> | <b>0.81</b> | outlier; rejected |              | 0.860            |
| <del>3x_BF184_7.1</del>       | <del>3.441E+08</del> | <del>1.980E-03</del> | <del>4.160E-07</del> | <del><b>0.20</b></del>  | <del><b>-6.70</b></del> |             | <del>0.21</del> | <b>0.71</b> | outlier; rejected |              | 0.824            |
| WHF11 Fe-rich wolframite      |                      |                      |                      |                         |                         |             |                 |             |                   |              |                  |
| 2 (average, n=11)             | 3.298E+08            | 1.980E-03            | 4.532E-06            | <b>0.18</b>             |                         | <b>4.70</b> |                 | <b>2.26</b> |                   | <b>-4.52</b> | <b>4.75 2.18</b> |
| 11_BF184_1.1                  | 3.166E+08            | 1.978E-03            | 6.200E-07            | <b>-0.84</b>            | <b>-5.60</b>            | <b>4.76</b> | 0.31            | <b>0.74</b> |                   | <b>-5.54</b> | 0.743            |
| 11_BF184_2.1                  | 3.833E+08            | 1.984E-03            | 3.130E-07            | <b>1.99</b>             | <b>-4.69</b>            | <b>6.68</b> | 0.16            | <b>0.70</b> |                   | <b>-2.71</b> | 0.673            |
| 11_BF184_3.1                  | 3.297E+08            | 1.978E-03            | 7.520E-07            | <b>-0.72</b>            | <b>-4.62</b>            | <b>3.91</b> | 0.38            | <b>0.77</b> |                   | <b>-5.42</b> | 0.668            |
| 11_BF184_3.2                  | 2.937E+08            | 1.978E-03            | 9.280E-07            | <b>-0.69</b>            | <b>-4.61</b>            | <b>3.92</b> | 0.46            | <b>0.82</b> |                   | <b>-5.39</b> | 0.667            |
| 11_BF184_4.1                  | 2.922E+08            | 1.978E-03            | 8.060E-07            | <b>-1.04</b>            | <b>-4.48</b>            | <b>3.44</b> | 0.40            | <b>0.79</b> |                   | <b>-5.74</b> | 0.657            |
| 11_BF184_4.2                  | 3.137E+08            | 1.978E-03            | 6.650E-07            | <b>-0.79</b>            | <b>-4.80</b>            | <b>4.01</b> | 0.33            | <b>0.75</b> |                   | <b>-5.49</b> | 0.682            |
| 11_BF184_5.1                  | 3.595E+08            | 1.983E-03            | 3.110E-07            | <b>1.45</b>             | <b>-4.30</b>            | <b>5.76</b> | 0.16            | <b>0.70</b> |                   | <b>-3.25</b> | 0.643            |
| 11_BF184_5.2                  | 3.533E+08            | 1.983E-03            | 2.190E-07            | <b>1.48</b>             | <b>-4.39</b>            | <b>5.87</b> | 0.11            | <b>0.69</b> |                   | <b>-3.22</b> | 0.650            |
| 11_BF184_6.1                  | 3.059E+08            | 1.979E-03            | 8.620E-07            | <b>-0.51</b>            | <b>-3.96</b>            | <b>3.45</b> | 0.43            | <b>0.80</b> |                   | <b>-5.21</b> | 0.615            |
| 11_BF184_7.1                  | 3.579E+08            | 1.982E-03            | 4.560E-07            | <b>1.08</b>             | <b>-4.33</b>            | <b>5.41</b> | 0.23            | <b>0.71</b> |                   | <b>-3.62</b> | 0.645            |
| 11_BF184_8.1                  | 3.223E+08            | 1.981E-03            | 1.492E-06            | <b>0.62</b>             | <b>-4.47</b>            | <b>5.09</b> | 0.74            | <b>1.01</b> | large error       | <b>-4.08</b> | 0.656            |
| WHF12 Fe-rich wolframite      |                      |                      |                      |                         |                         |             |                 |             |                   |              |                  |
| 2 (average, n=10)             | 3.246E+08            | 1.980E-03            | 5.647E-06            | <b>0.19</b>             |                         | <b>4.74</b> |                 | <b>2.82</b> |                   | <b>-4.54</b> |                  |
| 12_BF184_1.1                  | 2.796E+08            | 1.978E-03            | 5.640E-07            | <b>-0.91</b>            | <b>-4.75</b>            | <b>3.85</b> | 0.28            | <b>0.73</b> |                   | <b>-5.65</b> | 0.678            |
| 12_BF184_2.1                  | 2.829E+08            | 1.977E-03            | 5.790E-07            | <b>-1.34</b>            | <b>-4.23</b>            | <b>2.89</b> | 0.29            | <b>0.74</b> |                   | <b>-6.08</b> | 0.637            |
| 12_BF184_3.1                  | 3.689E+08            | 1.982E-03            | 5.160E-07            | <b>1.37</b>             | <b>-4.76</b>            | <b>6.12</b> | 0.26            | <b>0.72</b> |                   | <b>-3.37</b> | 0.678            |
| 12_BF184_3.2                  | 3.776E+08            | 1.984E-03            | 6.570E-07            | <b>2.00</b>             | <b>-4.75</b>            | <b>6.75</b> | 0.33            | <b>0.75</b> |                   | <b>-2.74</b> | 0.678            |
| 12_BF184_4.1                  | 3.244E+08            | 1.981E-03            | 7.530E-07            | <b>0.46</b>             | <b>-5.02</b>            | <b>5.47</b> | 0.38            | <b>0.77</b> |                   | <b>-4.28</b> | 0.699            |
| 12_BF184_4.2                  | 3.174E+08            | 1.978E-03            | 1.202E-06            | <b>-0.62</b>            | <b>-4.70</b>            | <b>4.08</b> | 0.60            | <b>0.90</b> |                   | <b>-5.36</b> | 0.674            |
| 12_BF184_5.1                  | 2.779E+08            | 1.977E-03            | 3.720E-07            | <b>-1.54</b>            | <b>-4.76</b>            | <b>3.23</b> | 0.19            | <b>0.70</b> |                   | <b>-6.28</b> | 0.679            |
| 12_BF184_5.2                  | 3.400E+08            | 1.981E-03            | 6.040E-07            | <b>0.75</b>             | <b>-4.69</b>            | <b>5.44</b> | 0.30            | <b>0.74</b> |                   | <b>-3.99</b> | 0.673            |
| 12_BF184_6.1                  | 2.968E+08            | 1.978E-03            | 1.158E-06            | <b>-0.72</b>            | <b>-4.61</b>            | <b>3.89</b> | 0.58            | <b>0.89</b> |                   | <b>-5.46</b> | 0.667            |
| 12_BF184_7.1                  | 3.810E+08            | 1.985E-03            | 6.720E-07            | <b>2.49</b>             | <b>-4.77</b>            | <b>7.26</b> | 0.34            | <b>0.76</b> |                   | <b>-2.25</b> | 0.680            |
| 24MHP212 wolframite (average, |                      |                      |                      |                         |                         |             |                 |             |                   |              |                  |
| 2 n=21 out of 23)             | 4.692E+08            | 1.982E-03            | 1.770E-06            | <b>1.23</b>             |                         | <b>0.80</b> |                 | <b>0.88</b> |                   | <b>0.43</b>  |                  |
| 212A1_BF184_1.1               | 5.111E+08            | 1.982E-03            | 5.610E-07            | <b>1.19</b>             | <b>0.43</b>             | <b>0.76</b> | 0.28            | <b>0.73</b> |                   | <b>0.41</b>  | 0.209            |
| 212A1_BF184_1.2               | 5.140E+08            | 1.983E-03            | 5.440E-07            | <b>1.66</b>             | <b>0.39</b>             | <b>1.28</b> | 0.27            | <b>0.73</b> |                   | <b>0.88</b>  | 0.214            |
| 212A1_BF184_2.1               | 5.150E+08            | 1.981E-03            | 9.130E-07            | <b>0.66</b>             | <b>0.42</b>             | <b>0.24</b> | 0.46            | <b>0.82</b> |                   | <b>-0.12</b> | 0.210            |
| 212A1_BF184_2.2               | 5.167E+08            | 1.983E-03            | 7.990E-07            | <b>1.52</b>             | <b>0.41</b>             | <b>1.11</b> | 0.40            | <b>0.79</b> |                   | <b>0.74</b>  | 0.211            |
| 212A1_BF184_3.1               | 4.742E+08            | 1.982E-03            | 5.520E-07            | <b>0.98</b>             | <b>-0.23</b>            | <b>1.21</b> | 0.28            | <b>0.73</b> |                   | <b>0.20</b>  | 0.278            |
| 212A1_BF184_3.2               | 4.973E+08            | 1.981E-03            | 6.800E-07            | <b>0.88</b>             | <b>0.05</b>             | <b>0.83</b> | 0.34            | <b>0.76</b> |                   | <b>0.10</b>  | 0.249            |
| 212A1_BF184_4.1               | 5.101E+08            | 1.981E-03            | 3.230E-07            | <b>0.59</b>             | <b>0.42</b>             | <b>0.17</b> | 0.16            | <b>0.70</b> |                   | <b>-0.19</b> | 0.210            |
| 212A1_BF184_4.2               | 5.125E+08            | 1.982E-03            | 1.532E-06            | <b>1.04</b>             | <b>0.38</b>             | <b>0.66</b> | 0.76            | <b>1.02</b> | large error       | <b>0.26</b>  | 0.214            |
| 212A1_BF184_5.1               | 4.998E+08            | 1.981E-03            | 3.230E-07            | <b>0.45</b>             | <b>0.20</b>             | <b>0.25</b> | 0.16            | <b>0.70</b> |                   | <b>-0.33</b> | 0.234            |

|                                                       |                      |                      |                      |                         |                         |             |                 |                        |                            |              |       |
|-------------------------------------------------------|----------------------|----------------------|----------------------|-------------------------|-------------------------|-------------|-----------------|------------------------|----------------------------|--------------|-------|
| 212A1_BF184_5.2                                       | 4.972E+08            | 1.982E-03            | 1.380E-07            | <b>1.17</b>             | <b>0.20</b>             | <b>0.97</b> | 0.07            | <b>0.68</b>            |                            | <b>0.39</b>  | 0.233 |
| 212A1_BF184_6.2                                       | 4.922E+08            | 1.983E-03            | 5.240E-07            | <b>1.52</b>             | <b>0.13</b>             | <b>1.38</b> | 0.26            | <b>0.73</b>            |                            | <b>0.74</b>  | 0.240 |
| <del>212A1_BF184_6.3</del>                            | <del>4.931E+08</del> | <del>1.980E-03</del> | <del>5.890E-07</del> | <del><b>0.14</b></del>  |                         |             | <del>0.29</del> | <del><b>0.74</b></del> | outlier; rejected          |              |       |
| 212BX_BF288_2.1                                       | 4.376E+08            | 1.983E-03            | 3.420E-07            | <b>1.88</b>             | <b>0.23</b>             | <b>1.65</b> | 0.17            | <b>0.70</b>            |                            | <b>1.10</b>  | 0.230 |
| 212BX_BF288_3.1                                       | 4.482E+08            | 1.983E-03            | 1.044E-06            | <b>1.89</b>             | <b>0.62</b>             | <b>1.27</b> | 0.52            | <b>0.85</b>            |                            | <b>1.11</b>  | 0.188 |
| 212BX_BF288_4.1                                       | 4.430E+08            | 1.983E-03            | 4.660E-07            | <b>1.46</b>             | <b>0.40</b>             | <b>1.07</b> | 0.23            | <b>0.72</b>            |                            | <b>0.68</b>  | 0.212 |
| 212BX_BF288_5.1                                       | 4.299E+08            | 1.982E-03            | 8.490E-07            | <b>0.98</b>             | <b>0.27</b>             | <b>0.71</b> | 0.42            | <b>0.80</b>            |                            | <b>0.20</b>  | 0.226 |
| 212BX_BF288_6.1                                       | 4.390E+08            | 1.982E-03            | 8.070E-07            | <b>1.05</b>             | <b>0.59</b>             | <b>0.45</b> | 0.40            | <b>0.79</b>            |                            | <b>0.27</b>  | 0.191 |
| 212BX_BF288_7.1                                       | 4.301E+08            | 1.982E-03            | 8.650E-07            | <b>1.33</b>             | <b>0.20</b>             | <b>1.13</b> | 0.43            | <b>0.80</b>            |                            | <b>0.55</b>  | 0.233 |
| <del>212BX_BF288_8.1</del>                            | <del>4.355E+08</del> | <del>1.984E-03</del> | <del>8.630E-07</del> | <del><b>2.13</b></del>  | <del><b>0.33</b></del>  |             | <del>0.43</del> | <del><b>0.80</b></del> | outlier; rejected          |              | 0.220 |
| 212BX_BF288_9.1                                       | 4.223E+08            | 1.981E-03            | 1.012E-06            | <b>0.89</b>             | <b>0.21</b>             | <b>0.68</b> | 0.50            | <b>0.85</b>            |                            | <b>0.11</b>  | 0.232 |
| 212BX_BF288_10.1                                      | 4.301E+08            | 1.983E-03            | 7.490E-07            | <b>1.82</b>             | <b>0.29</b>             | <b>1.53</b> | 0.37            | <b>0.77</b>            |                            | <b>1.04</b>  | 0.224 |
| 212BX_BF288_11.1                                      | 3.903E+08            | 1.981E-03            | 6.140E-07            | <b>0.88</b>             | <b>-2.09</b>            | <b>2.97</b> | 0.31            | <b>0.74</b>            | ?                          | <b>0.10</b>  | 0.455 |
| 212BX_BF288_12.1                                      | 4.419E+08            | 1.983E-03            | 1.067E-06            | <b>1.91</b>             | <b>0.45</b>             | <b>1.46</b> | 0.53            | <b>0.86</b>            |                            | <b>1.13</b>  | 0.207 |
| 24MHP225 wolframite (average, n=8 out of 9)           |                      |                      |                      |                         |                         |             |                 |                        |                            |              |       |
| 225_BF288_1.1                                         | 4.486E+08            | 1.982E-03            | 1.158E-06            | <b>1.26</b>             |                         | <b>0.88</b> |                 | <b>0.58</b>            |                            | <b>0.38</b>  |       |
| <del>225_BF288_1.1</del>                              | <del>4.879E+08</del> | <del>1.984E-03</del> | <del>5.200E-07</del> | <del><b>2.30</b></del>  | <del><b>0.17</b></del>  |             | <del>0.26</del> | <del><b>0.73</b></del> | high CPS/outlier; rejected |              | 0.237 |
| 225_BF288_2.1                                         | 4.442E+08            | 1.981E-03            | 6.580E-07            | <b>0.82</b>             | <b>0.06</b>             | <b>0.76</b> | 0.33            | <b>0.75</b>            |                            | <b>-0.06</b> | 0.248 |
| <del>225_BF288_2.2</del>                              | <del>4.472E+08</del> | <del>1.980E-03</del> | <del>4.170E-07</del> | <del><b>0.18</b></del>  | <del><b>0.08</b></del>  |             | <del>0.21</del> | <del><b>0.71</b></del> | outlier; rejected          |              | 0.246 |
| 225_BF288_3.1                                         | 4.566E+08            | 1.981E-03            | 6.680E-07            | <b>0.89</b>             | <b>0.21</b>             | <b>0.68</b> | 0.33            | <b>0.76</b>            |                            | <b>0.01</b>  | 0.232 |
| 225_BF288_4.1                                         | 4.637E+08            | 1.982E-03            | 6.270E-07            | <b>1.18</b>             | <b>0.17</b>             | <b>1.02</b> | 0.31            | <b>0.75</b>            |                            | <b>0.30</b>  | 0.237 |
| 225_BF288_5.1                                         | 4.328E+08            | 1.982E-03            | 5.930E-07            | <b>1.30</b>             | <b>-0.47</b>            | <b>1.77</b> | 0.30            | <b>0.74</b>            |                            | <b>0.42</b>  | 0.303 |
| 225_BF288_6.1                                         | 4.381E+08            | 1.983E-03            | 5.230E-07            | <b>1.44</b>             | <b>-0.34</b>            | <b>1.78</b> | 0.26            | <b>0.73</b>            |                            | <b>0.56</b>  | 0.289 |
| 225_BF288_6.2                                         | 4.377E+08            | 1.982E-03            | 1.247E-06            | <b>1.38</b>             | <b>-0.25</b>            | <b>1.63</b> | 0.62            | <b>0.92</b>            |                            | <b>0.50</b>  | 0.280 |
| 225_BF288_7.1                                         | 4.542E+08            | 1.983E-03            | 2.550E-07            | <b>1.72</b>             | <b>-0.08</b>            | <b>1.80</b> | 0.13            | <b>0.69</b>            |                            | <b>0.84</b>  | 0.263 |
| 225_BF288_8.1                                         | 4.617E+08            | 1.982E-03            | 3.720E-07            | <b>1.35</b>             | <b>0.39</b>             | <b>0.96</b> | 0.19            | <b>0.70</b>            |                            | <b>0.47</b>  | 0.213 |
| 23DHT24J Fe-rich wolframite (average, n=15 out of 17) |                      |                      |                      |                         |                         |             |                 |                        |                            |              |       |
| 24J_BF184_1.1                                         | 3.058E+08            | 1.975E-03            | 2.414E-06            | <b>-2.33</b>            |                         | <b>5.40</b> |                 | <b>1.20</b>            |                            | <b>-7.73</b> |       |
| 24J_BF184_3.1                                         | 3.326E+08            | 1.977E-03            | 6.040E-07            | <b>-1.58</b>            | <b>-7.55</b>            | <b>5.97</b> | 0.30            | <b>0.74</b>            |                            | <b>-6.98</b> | 0.884 |
| 24J_BF184_4.1                                         | 3.504E+08            | 1.977E-03            | 5.490E-07            | <b>-1.54</b>            | <b>-7.46</b>            | <b>5.92</b> | 0.27            | <b>0.73</b>            |                            | <b>-6.94</b> | 0.877 |
| 24J_BF184_4.1                                         | 3.316E+08            | 1.974E-03            | 4.550E-07            | <b>-2.68</b>            | <b>-7.71</b>            | <b>5.03</b> | 0.23            | <b>0.71</b>            |                            | <b>-8.08</b> | 0.895 |
| <del>24J_BF184_7.1</del>                              | <del>3.187E+08</del> | <del>1.973E-03</del> | <del>8.800E-07</del> | <del><b>-3.62</b></del> | <del><b>-7.80</b></del> |             | <del>0.44</del> | <del><b>0.81</b></del> | rejected                   |              | 0.901 |
| 24J_BF184_9.1                                         | 3.420E+08            | 1.975E-03            | 5.670E-07            | <b>-2.56</b>            | <b>-7.64</b>            | <b>5.09</b> | 0.28            | <b>0.73</b>            |                            | <b>-7.96</b> | 0.890 |
| 24J_BF184_10.1                                        | 3.368E+08            | 1.975E-03            | 3.670E-07            | <b>-2.46</b>            | <b>-7.38</b>            | <b>4.92</b> | 0.18            | <b>0.70</b>            |                            | <b>-7.86</b> | 0.872 |
| 24J_BF184_11.1                                        | 3.386E+08            | 1.975E-03            | 6.930E-07            | <b>-2.46</b>            | <b>-7.74</b>            | <b>5.28</b> | 0.35            | <b>0.76</b>            |                            | <b>-7.86</b> | 0.897 |
| 24J_BF184_12.1                                        | 3.221E+08            | 1.973E-03            | 3.400E-07            | <b>-3.16</b>            | <b>-7.64</b>            | <b>4.47</b> | 0.17            | <b>0.70</b>            |                            | <b>-8.56</b> | 0.890 |
| <del>24J_BF184_13.1</del>                             | <del>3.150E+08</del> | <del>1.972E-03</del> | <del>5.690E-07</del> | <del><b>-3.75</b></del> | <del><b>-7.65</b></del> |             | <del>0.28</del> | <del><b>0.73</b></del> | rejected                   |              | 0.891 |
| 24J_BF184_14.1                                        | 3.127E+08            | 1.974E-03            | 3.610E-07            | <b>-3.07</b>            | <b>-7.57</b>            | <b>4.50</b> | 0.18            | <b>0.70</b>            |                            | <b>-8.47</b> | 0.885 |
| 24J_BF288_1.1                                         | 2.770E+08            | 1.976E-03            | 6.070E-07            | <b>-1.67</b>            | <b>-7.73</b>            | <b>6.06</b> | 0.30            | <b>0.74</b>            |                            | <b>-7.07</b> | 0.897 |
| 24J_BF288_2.1                                         | 2.681E+08            | 1.974E-03            | 1.527E-06            | <b>-2.66</b>            | <b>-7.66</b>            | <b>5.00</b> | 0.76            | <b>1.02</b>            | low CPS; large error       | <b>-8.06</b> | 0.891 |
| 24J_BF288_3.1                                         | 2.955E+08            | 1.977E-03            | 4.660E-07            | <b>-1.29</b>            | <b>-7.83</b>            | <b>6.54</b> | 0.23            | <b>0.72</b>            |                            | <b>-6.69</b> | 0.903 |
| 24J_BF288_4.1                                         | 2.596E+08            | 1.975E-03            | 9.690E-07            | <b>-2.53</b>            | <b>-7.58</b>            | <b>5.06</b> | 0.48            | <b>0.83</b>            | low CPS                    | <b>-7.93</b> | 0.886 |
| 24J_BF288_4.2                                         | 2.805E+08            | 1.976E-03            | 9.150E-07            | <b>-2.08</b>            | <b>-7.49</b>            | <b>5.41</b> | 0.46            | <b>0.82</b>            |                            | <b>-7.48</b> | 0.880 |
| 24J_BF288_5.1                                         | 2.778E+08            | 1.976E-03            | 1.307E-06            | <b>-1.97</b>            | <b>-7.69</b>            | <b>5.72</b> | 0.65            | <b>0.94</b>            |                            | <b>-7.37</b> | 0.893 |
| 24J_BF288_5.2                                         | 2.622E+08            | 1.973E-03            | 1.261E-06            | <b>-3.17</b>            | <b>-7.75</b>            | <b>4.58</b> | 0.63            | <b>0.92</b>            | low CPS                    | <b>-8.57</b> | 0.897 |
| <del>24J_BF288_6.1</del>                              | <del>2.868E+08</del> | <del>1.979E-03</del> | <del>4.960E-07</del> | <del><b>-0.58</b></del> | <del><b>-7.60</b></del> |             | <del>0.25</del> | <del><b>0.72</b></del> | outlier; rejected          |              | 0.887 |

|                                                   |                      |                      |                      |                  |                  |             |      |                 |             |                   |  |  |       |
|---------------------------------------------------|----------------------|----------------------|----------------------|------------------|------------------|-------------|------|-----------------|-------------|-------------------|--|--|-------|
| 25YFDJS01 wolframite (average,<br>n=12 out of 13) | 3.854E+08            | 1.982E-03            | 2.592E-06            | <b>1.15</b>      |                  |             |      | <b>1.29</b>     |             |                   |  |  |       |
| S01_BF288_1.1                                     | <del>3.043E+08</del> | <del>1.978E-03</del> | <del>7.420E-07</del> | <del>-0.97</del> | <del>-2.76</del> |             |      | <del>0.37</del> | <b>0.77</b> | outlier; rejected |  |  | 0.515 |
| S01_BF288_2.1                                     | 4.019E+08            | 1.982E-03            | 6.090E-07            | <b>0.94</b>      | <b>-2.69</b>     | <b>3.63</b> | 0.30 | <b>0.74</b>     |             |                   |  |  | 0.509 |
| S01_BF288_3.1                                     | 3.618E+08            | 1.980E-03            | 1.038E-06            | <b>0.02</b>      | <b>-2.77</b>     | <b>2.80</b> | 0.52 | <b>0.85</b>     |             |                   |  |  | 0.516 |
| S01_BF288_5.1                                     | 3.798E+08            | 1.981E-03            | 8.760E-07            | <b>0.66</b>      | <b>-2.63</b>     | <b>3.29</b> | 0.44 | <b>0.81</b>     |             |                   |  |  | 0.504 |
| S01_BF288_8.1                                     | 4.061E+08            | 1.983E-03            | 1.137E-06            | <b>1.61</b>      | <b>-2.66</b>     | <b>4.27</b> | 0.57 | <b>0.88</b>     |             |                   |  |  | 0.506 |
| S01_BF288_9.1                                     | 3.728E+08            | 1.981E-03            | 5.440E-07            | <b>0.90</b>      | <b>-2.66</b>     | <b>3.56</b> | 0.27 | <b>0.73</b>     |             |                   |  |  | 0.506 |
| S01_BF288_10.1                                    | 4.040E+08            | 1.983E-03            | 8.420E-07            | <b>1.86</b>      | <b>-2.50</b>     | <b>4.36</b> | 0.42 | <b>0.80</b>     |             |                   |  |  | 0.492 |
| S01_BF288_13.1                                    | 4.058E+08            | 1.983E-03            | 6.890E-07            | <b>1.91</b>      | <b>-2.97</b>     | <b>4.87</b> | 0.34 | <b>0.76</b>     |             |                   |  |  | 0.532 |
| S01_BF288_14.1                                    | 3.951E+08            | 1.984E-03            | 4.720E-07            | <b>1.92</b>      | <b>-2.54</b>     | <b>4.47</b> | 0.24 | <b>0.72</b>     |             |                   |  |  | 0.496 |
| S01_BF288_16.1                                    | 3.816E+08            | 1.982E-03            | 7.670E-07            | <b>1.22</b>      | <b>-2.59</b>     | <b>3.81</b> | 0.38 | <b>0.78</b>     |             |                   |  |  | 0.500 |
| S01_BF288_17.1                                    | 3.546E+08            | 1.980E-03            | 2.800E-07            | <b>0.19</b>      | <b>-2.67</b>     | <b>2.86</b> | 0.14 | <b>0.69</b>     |             |                   |  |  | 0.507 |
| S01_BF288_18.1                                    | 3.721E+08            | 1.982E-03            | 5.090E-07            | <b>0.97</b>      | <b>-2.89</b>     | <b>3.86</b> | 0.25 | <b>0.72</b>     |             |                   |  |  | 0.526 |
| S01_BF288_20.1                                    | 3.889E+08            | 1.983E-03            | 1.365E-06            | <b>1.66</b>      | <b>-2.65</b>     | <b>4.31</b> | 0.68 | <b>0.96</b>     |             |                   |  |  | 0.506 |
